# Supplementary material for: Sport Medicine Diagnostic Coding System (SMDCS) and the Orchard Sports Injury and Illness Classification System (OSIICS): revised 2020 consensus versions
Source: HighWire-hosted journal article supplement (doi:10.1136/bjsports-2019-101921), 2020-02-29
Supplement: bjsports-2019-101921supp001_data_supplement.xlsx [file bjsports-2019-101921supp001_data_supplement.xlsx]

## Sheet: SMDCS v2.0
Region Order	Region Name	Tissue Type	Pathology Type	Description	Region code	Structure code	Diagnosis code	SMDCS Code v2	Old Code SMDC v1	ICD-9 code	ICD11	ICD10 code	ICPC-2	Mode of Onset
1	HEAD	Nervous	Brain & spinal cord injury	Concussion	HE	21	40	HE.21.40	HE.21.51	851	NA07.0	S06.0	N79	Acute - Sudden Onset
1	HEAD	Nervous	Brain & spinal cord injury	Post concussion syndrome	HE	22	40	HE.22.40	HE.21.52	851	NA07.0	S06.0	N79	Repetitive - Gradual Onset
1	HEAD	Nervous	Brain & spinal cord injury	Subdural / epidural hematoma	HE	23	40	HE.23.40	HE.21.54	349.8	NA07.1	I62.0	K90	Acute - Sudden Onset
1	HEAD	Nervous	Brain & spinal cord injury	Structural brain injury	HE	24	40	HE.24.40	HE.21.53	851	NA0	G93.1	N99	Acute - Sudden Onset
1	HEAD	Bone	Fracture	Teeth fracture	HE	32	13	HE.32.13	HE.07.13	521.9	NA02.6	S02.5	D80	Acute - Sudden Onset
1	HEAD	Bone	Bone contusion	Nasal contusion	HE	32	24	HE.32.24	HE.05.23	920	NA0	S00.3	R88	Acute - Sudden Onset
1	HEAD	Bone	Fracture	Facial fracture	HE	33	13	HE.33.13	HE.30.13	802	NA02	S02.9	N80	Acute - Sudden Onset
1	HEAD	Bone	Fracture	Skull fracture	HE	34	13	HE.34.13	HE.32.13	800	NA02	S02.9	N80	Acute - Sudden Onset
1	HEAD	Bone	Fracture	Nasal fracture	HE	35	13	HE.35.13	HE.05.13	802	NA02.3	S02.2	L76	Acute - Sudden Onset
1	HEAD	Cartilage / synovium / bursa	Synovitis / capsulitis	TMJ disorder	HE	51	30	HE.51.30	HE.51.51	524.6	NA03.3	K10.9	D82	Repetitive - Gradual Onset
1	HEAD	Superficial tissues / skin	Contusion (superficial)	Facial contusion	HE	60	24	HE.60.24	HE.02.23	910	NA05	S00.8	S16	Acute - Sudden Onset
1	HEAD	Superficial tissues / skin	Laceration	Head Laceration	HE	60	25	HE.60.25	HE.00.24	873	NA01	S00.9	S18	Acute - Sudden Onset
1	HEAD	Superficial tissues / skin	Contusion (superficial)	Cauliflower ear	HE	61	24	HE.61.24	HE.04.52	738.7	NA0	M95.1	L99	Acute - Sudden Onset
1	HEAD	Superficial tissues / skin	Laceration	Scalp laceration	HE	61	25	HE.61.25	HE.01.24	873	NA00.00	S01.0	S18	Acute - Sudden Onset
1	HEAD	Superficial tissues / skin	Abrasion	Scalp abrasion	HE	61	26	HE.61.26	HE.01.25	910	NA00.00	S00.0	S18	Acute - Sudden Onset
1	HEAD	Superficial tissues / skin	Laceration	Facial laceration	HE	62	25	HE.62.25	HE.02.24	873.4	NA0	S00.8	S18	Acute - Sudden Onset
1	HEAD	Superficial tissues / skin	Abrasion	Facial abrasion	HE	62	26	HE.62.26	HE.02.25	910	NA0	S00.8	S17	Acute - Sudden Onset
1	HEAD	Superficial tissues / skin	Laceration	Tongue laceration	HE	63	25	HE.63.25	HE.06.24	529.9	NA0	K14.9	D20	Acute - Sudden Onset
1	HEAD	Vessels	Vascular trauma	Epistaxis	HE	71	45	HE.71.45	HE.05.51	784.7	NA0	R04.0	R06	Acute - Sudden Onset
1	HEAD	Internal Organs	Injury without tissue type specified	Other eye injury	HE	80	0	HE.80.00	HE.03.00	371	NA0	S05.9	F79	Acute - Sudden Onset
1	HEAD	Internal Organs	Abrasion	Corneal abrasion	HE	80	26	HE.80.26	HE.03.25	371.8	NA0	S05.0	F79	Acute - Sudden Onset
1	HEAD	Internal Organs	Organ Trauma	Detached retina	HE	81	46	HE.81.46	HE.03.51	361	NA0	H33.2	F82	Acute - Sudden Onset
1	HEAD	Internal Organs	Organ Trauma	Lens dislocation/subluxation	HE	82	46	HE.82.46	HE.03.52	364.9	NA0	H27.1	F99	Acute - Sudden Onset
1	HEAD	Internal Organs	Organ Trauma	Tinnitus / barotrauma	HE	83	46	HE.83.46	HE.04.53	384.8	NA0	H93.1	H03	Acute - Sudden Onset
1	HEAD	Internal Organs	Organ Trauma	Traumatic perforated ear drum	HE	84	46	HE.84.46	HE.04.54	384.8	NA0A.2	S09.2	H79	Acute - Sudden Onset
1	HEAD	Non-specific	Injury without tissue type specified	Other injury to head	HE	90	0	HE.90.00	HE.00.00	784.9	NA0	S09.9	N80	Acute - Sudden Onset
1	HEAD	Non-specific	Injury without tissue type specified	Other Ear Injury	HE	91	0	HE.91.00	HE.04.00	959	NA0	S09.9	H79	Acute - Sudden Onset
1	HEAD	Non-specific	Injury without tissue type specified	Mouth /throat disorder	HE	92	0	HE.92.00	HE.06.00	528.9	NA0	K13.7	D83	Acute - Sudden Onset
1	HEAD	Non-specific	Injury without tissue type specified	Other dental injury	HE	93	0	HE.93.00	HE.07.00	521.9	NA0	K08.9	D19	Acute - Sudden Onset
2	NECK	Muscle / tendon	Muscle Injury	Cervical strain / whiplash	NE	10	7	NE.10.07	NE.10.07	723.8	NA23.4	S13.4	L79	Acute - Sudden Onset
2	NECK	Muscle / tendon	Muscle Injury	Torticolis / spasm	NE	10	8	NE.10.08	NE.10.08	723.8	NA2	G24.3	L83	Acute - Sudden Onset
2	NECK	Muscle / tendon	Muscle Injury	Trapezius strain	NE	11	7	NE.11.07	NE.11.07	723.8	NA61.0	M62.6	L19	Acute - Sudden Onset
2	NECK	Muscle / tendon	Muscle Injury	Trapezius trigger points	NE	11	8	NE.11.08	NE.11.51	723.8	NA2	M53.8	L18	Repetitive - Gradual Onset
2	NECK	Muscle / tendon	Muscle Injury	Suboccipital muscle strain	NE	12	7	NE.12.07	NE.12.07	723.8	NA61.0	M62.6	L19	Acute - Sudden Onset
2	NECK	Nervous	Peripheral nerve injury	Neck radiculopathy	NE	20	42	NE.20.42	NE.20.51	723.8	NA2	M50.1	L83	Repetitive - Gradual Onset
2	NECK	Nervous	Peripheral nerve injury	Brachial plexus syndrome (Stinger)	NE	21	39	NE.21.39	NE.21.51	353	NA41	S14.3	N81	Repetitive - Gradual Onset
2	NECK	Nervous	Brain & spinal cord injury	Cervical spinal contusion/concussion	NE	21	40	NE.21.40	NE.21.23	952	NA30	S14.1	N81	Acute - Sudden Onset
2	NECK	Nervous	Peripheral nerve injury	11th cranial nerve injury	NE	22	39	NE.22.39	NE.22.51	353	NA04	S04.7	N81	Repetitive - Gradual Onset
2	NECK	Nervous	Brain & spinal cord injury	Cervical spinal cord compression/transection	NE	22	40	NE.22.40	NE.21.10	952	NA30	S14.0	N81	Acute - Sudden Onset
2	NECK	Bone	Fracture	Cervical spine fracture	NE	31	13	NE.31.13	NE.31.13	723.8	NA22.2	S12.9	L76	Acute - Sudden Onset
2	NECK	Bone	Injury without tissue type specified	Cervical spinal stenosis	NE	31	33	NE.31.33	NE.31.53	723	FA80.3	M48.0	L83	Repetitive - Gradual Onset
2	NECK	Cartilage / synovium / bursa	Synovitis / capsulitis	Cervical facet syndrome	NE	41	30	NE.41.30	NE.41.51	723.8	NA2	M12.8	L83	Repetitive - Gradual Onset
2	NECK	Cartilage / synovium / bursa	Arthritis	Cervical facet osteoarthritis	NE	41	34	NE.41.34	NE.41.32	715.1	FA0	M12.8	L83	Repetitive - Gradual Onset
2	NECK	Cartilage / synovium / bursa	Synovitis / capsulitis	Cervical degenerative disc disease	NE	42	30	NE.42.30	NE.42.51	722.4	FA80.0	M50.3	L83	Repetitive - Gradual Onset
2	NECK	Ligament / joint capsule	Injury without tissue type specified	Cervical disc herniation	NE	42	33	NE.42.33	NE.42.52	722	FA80.1	M50.3	L83	Repetitive - Gradual Onset
2	NECK	Superficial tissues / skin	Laceration	Neck laceration	NE	60	25	NE.60.25	NE.00.24	873	NA21.2	S10.9	S18	Acute - Sudden Onset
2	NECK	Superficial tissues / skin	Abrasion	Neck abrasion	NE	60	26	NE.60.26	NE.00.25	916	NA20.0	S10.9	S17	Acute - Sudden Onset
2	NECK	Vessels	Vascular trauma	Thoracic Outlet Syndrome	NE	70	45	NE.70.45	NE.70.51	723.8	NA2	G54.0	N94	Repetitive - Gradual Onset
2	NECK	Non-specific	Injury without tissue type specified	Other neck injury	NE	90	0	NE.90.00	NE.00.00	723.8	NA2	M53.8	L84	Acute - Sudden Onset
2	NECK	Superficial tissues / skin	Contusion (superficial)	Neck / throat contusion	NE	90	24	NE.90.24	NE.00.23	920	NA2	S10.0	S16	Acute - Sudden Onset
3	SHOULDER	Muscle / tendon	Muscle Injury	Deltoid strain	SH	11	7	SH.11.07	SH.11.07	840.8	NC16	S46.8	L81	Acute - Sudden Onset
3	SHOULDER	Muscle / tendon	Muscle Injury	Rotator cuff strain	SH	12	7	SH.12.07	SH.12.07	840.4	NC16.00	S46.0	L81	Acute - Sudden Onset
3	SHOULDER	Muscle / tendon	Muscle Injury	Rotator cuff tear	SH	12	9	SH.12.09	SH.12.09	726.1	NC16.00	S46.0	L81	Acute - Sudden Onset
3	SHOULDER	Muscle / tendon	Tendinopathy	Rotator cuff tendinopathy	SH	12	28	SH.12.28	SH.12.26	840.6	NC16	M75.1	L92	Repetitive - Gradual Onset
3	SHOULDER	Muscle / tendon	Muscle Injury	Pectoralis strain	SH	13	7	SH.13.07	SH.15.07	840.8	NC16	S46.8	L81	Acute - Sudden Onset
3	SHOULDER	Muscle / tendon	Muscle Injury	Pectoralis tear / rupture	SH	13	9	SH.13.09	SH.15.09	840.8	NC16	S46.8	L81	Acute - Sudden Onset
3	SHOULDER	Muscle / tendon	Tendinopathy	Long head of biceps tendinitis	SH	13	28	SH.13.28	SH.13.26	840.8	NC16.1	M75.2	L92	Repetitive - Gradual Onset
3	SHOULDER	Muscle / tendon	Muscle Injury	Rhomboid strain	SH	14	7	SH.14.07	SH.16.07	840.8	NC16	S46.8	L81	Acute - Sudden Onset
3	SHOULDER	Muscle / tendon	Tendon Rupture	Long head of biceps rupture	SH	14	9	SH.14.09	SH.13.09	840.8	NC16.1	S46.1	L81	Acute - Sudden Onset
3	SHOULDER	Nervous	Peripheral nerve injury	Shoulder neuroma	SH	20	41	SH.20.41	SH.20.44	955.9	NC14	G56.8	N94	Repetitive - Gradual Onset
3	SHOULDER	Nervous	Peripheral nerve injury	Shoulder reflex sympathetic dystrophy	SH	20	43	SH.20.43	SH.20.41	955.9	NC14	M89.0	L99	Repetitive - Gradual Onset
3	SHOULDER	Nervous	Peripheral nerve injury	Axillary nerve Injury - Isolated	SH	21	39	SH.21.39	SH.21.51	955	NC14.3	S44.3	L81	Repetitive - Gradual Onset
3	SHOULDER	Nervous	Peripheral nerve injury	Long thoracic nerve palsy / winging scapula	SH	22	39	SH.22.39	SH.22.51	955.7	NC14	S44.8	N81	Repetitive - Gradual Onset
3	SHOULDER	Nervous	Peripheral nerve injury	Thoracodorsal nerve palsy	SH	23	39	SH.23.39	SH.23.51	955.7	NC14	S44.8	N81	Repetitive - Gradual Onset
3	SHOULDER	Nervous	Peripheral nerve injury	Suprascapular nerve entrapment	SH	24	39	SH.24.39	SH.24.51	955.7	NC14	S44.8	N81	Repetitive - Gradual Onset
3	SHOULDER	Nervous	Peripheral nerve injury	Axillary nerve Injury - With fracture or dislocation	SH	25	39	SH.25.39	SH.21.52	955	NC14	S44.3	L81	Repetitive - Gradual Onset
3	SHOULDER	Bone	Fracture	Clavicular fracture	SH	32	13	SH.32.13	SH.32.13	810	NC12.0	S42.0	L76	Acute - Sudden Onset
3	SHOULDER	Bone	Bone stress injury	Distal clavicular osteolysis	SH	32	33	SH.32.33	SH.42.53	840	NC12	M89.5	L99	Repetitive - Gradual Onset
3	SHOULDER	Bone	Fracture	Scapular fracture	SH	33	13	SH.33.13	SH.33.13	811	NC12.1	S42.1	L76	Acute - Sudden Onset
3	SHOULDER	Bone	Injury without tissue type specified	Os acrominale -symptomatic	SH	33	32	SH.33.32	SH.33.51	811	NC12	M89.8	L76	Repetitive - Gradual Onset
3	SHOULDER	Bone	Fracture	Humeral neck fracture	SH	34	13	SH.34.13	SH.34.13	812	NC12.2	S42.2	L76	Acute - Sudden Onset
3	SHOULDER	Bone	Physis injury	Humeral proximal growth plate / physeal injury	SH	34	20	SH.34.20	SH.34.20	812	NC12	S42.2	L76	Acute - Sudden Onset
3	SHOULDER	Bone	Injury without tissue type specified	Hill-Sachs Lesion	SH	34	21	SH.34.21	SH.34.51	812.2	NC12	S42.2	L76	Acute - Sudden Onset
3	SHOULDER	Cartilage / synovium / bursa	Cartilage	Chondromalacia	SH	40	21	SH.40.21	SH.40.52	715.1	NC1	M94.2	L99	Repetitive - Gradual Onset
3	SHOULDER	Cartilage / synovium / bursa	Synovitis / capsulitis	Adhesive capsulitis / frozen shoulder	SH	40	30	SH.40.30	SH.40.51	726	FB53.0	M75.0	L92	Repetitive - Gradual Onset
3	SHOULDER	Cartilage / synovium / bursa	Arthritis	Shoulder degenerative/osteoarthritis	SH	40	34	SH.40.34	SH.40.32	715.1	FA0	M19.8	L92	Repetitive - Gradual Onset
3	SHOULDER	Cartilage / synovium / bursa	Synovitis / capsulitis	Impingement syndrome/subacromial bursitis	SH	41	30	SH.41.30	SH.61.52	726.1	FB50	M75.4	L92	Repetitive - Gradual Onset
3	SHOULDER	Cartilage / synovium / bursa	Bursitis	Acute subacromial bursitis - calcific	SH	41	33	SH.41.33	SH.61.29	840.9	FB50	M75.5	L92	Repetitive - Gradual Onset
3	SHOULDER	Cartilage / synovium / bursa	Arthritis	Acromioclavicular degnerative arthritis	SH	42	34	SH.42.34	SH.42.32	840	FA0	M19.0	L91	Repetitive - Gradual Onset
3	SHOULDER	Cartilage / synovium / bursa	Cartilage	Bankart lesion	SH	44	17	SH.44.17	SH.46.51	718	NC1	M24.1	L99	Acute - Sudden Onset
3	SHOULDER	Cartilage / synovium / bursa	Cartilage	Glenoid labrum tear	SH	46	21	SH.46.21	SH.46.09	718	NC1	M24.1	L99	Acute - Sudden Onset
3	SHOULDER	Cartilage / synovium / bursa	Cartilage	SLAP lesion	SH	47	21	SH.47.21	SH.46.52	718	NC1	M24.1	L99	Acute - Sudden Onset
3	SHOULDER	Ligament / joint capsule	Joint Sprain	Sternoclavicular joint 1° sprain -acute	SH	51	1	SH.51.01	SH.41.01	840.8	NC13	S43.6	L79	Acute - Sudden Onset
3	SHOULDER	Ligament / joint capsule	Joint Sprain	Sternoclavicular joint 2° sprain -acute	SH	51	2	SH.51.02	SH.41.02	840.8	NC13	S43.6	L79	Acute - Sudden Onset
3	SHOULDER	Ligament / joint capsule	Joint Sprain	Sternoclavicular joint 3° sprain -acute	SH	51	3	SH.51.03	SH.41.03	840.8	NC13	S43.6	L79	Acute - Sudden Onset
3	SHOULDER	Ligament / joint capsule	Joint Sprain	Sternoclavicular joint 1° sprain -chronic	SH	51	4	SH.51.04	SH.41.04	840.8	NC13	S43.6	L79	Repetitive - Gradual Onset
3	SHOULDER	Ligament / joint capsule	Joint Sprain	Sternoclavicular joint 2° sprain -chronic	SH	51	5	SH.51.05	SH.41.05	840.8	NC13	S43.6	L79	Repetitive - Gradual Onset
3	SHOULDER	Ligament / joint capsule	Joint Sprain	Sternoclavicular joint 3° sprain -chronic	SH	51	6	SH.51.06	SH.41.06	840.8	NC13	S43.6	L79	Repetitive - Gradual Onset
3	SHOULDER	Ligament / joint capsule	Joint Sprain	Acromioclavicular 1° sprain -acute	SH	52	1	SH.52.01	SH.42.01	840	NC13.6	S43.5	L79	Acute - Sudden Onset
3	SHOULDER	Ligament / joint capsule	Joint Sprain	Acromioclavicular 2° sprain -acute	SH	52	2	SH.52.02	SH.42.02	840	NC13.6	S43.5	L79	Acute - Sudden Onset
3	SHOULDER	Ligament / joint capsule	Joint Sprain	Acromioclavicular 3° sprain -acute	SH	52	3	SH.52.03	SH.42.03	840	NC13.6	S43.5	L79	Acute - Sudden Onset
3	SHOULDER	Ligament / joint capsule	Joint Sprain	Acromioclavicular 1° sprain -chronic	SH	52	4	SH.52.04	SH.42.04	840	NC13.6	S43.5	L79	Repetitive - Gradual Onset
3	SHOULDER	Ligament / joint capsule	Joint Sprain	Acromioclavicular 2° sprain -chronic	SH	52	5	SH.52.05	SH.42.05	840	NC13.6	S43.5	L79	Repetitive - Gradual Onset
3	SHOULDER	Ligament / joint capsule	Joint Sprain	Acromioclavicular 3° sprain -chronic	SH	52	6	SH.52.06	SH.42.06	840	NC13.6	S43.5	L79	Repetitive - Gradual Onset
3	SHOULDER	Ligament / joint capsule	Joint Sprain	Acromioclavicular 4° to 6° (Type IV-VI) sprain -acute	SH	52	10	SH.52.10	SH.42.10	840	NC13.1	S43.5	L79	Acute - Sudden Onset
3	SHOULDER	Ligament / joint capsule	Chronic Instability	Acromioclavicular 4° to 6° (Type IV-VI) sprain -chronic	SH	52	12	SH.52.12	SH.42.12	840	NC13.1	S43.5	L79	Repetitive - Gradual Onset
3	SHOULDER	Ligament / joint capsule	Joint Sprain	Anterior dislocation (initial)	SH	53	10	SH.53.10	SH.43.10	831	NC13	S43.0	L80	Acute - Sudden Onset
3	SHOULDER	Ligament / joint capsule	Joint Sprain	Anterior subluxation (initial)	SH	53	11	SH.53.11	SH.43.11	831	NC13	S43.0	L80	Acute - Sudden Onset
3	SHOULDER	Ligament / joint capsule	Chronic Instability	Anterior recurrent dislocation/instability	SH	53	12	SH.53.12	SH.43.12	831	NC13	S43.0	L80	Repetitive - Gradual Onset
3	SHOULDER	Ligament / joint capsule	Joint Sprain	Posterior dislocation (initial)	SH	54	10	SH.54.10	SH.44.10	831	NC13	S43.0	L80	Acute - Sudden Onset
3	SHOULDER	Ligament / joint capsule	Joint Sprain	Posterior subluxation	SH	54	11	SH.54.11	SH.44.11	831	NC13	S43.0	L80	Acute - Sudden Onset
3	SHOULDER	Ligament / joint capsule	Chronic Instability	Posterior recurrent dislocation/instability	SH	54	12	SH.54.12	SH.44.12	831	NC13	S43.0	L80	Repetitive - Gradual Onset
3	SHOULDER	Ligament / joint capsule	Chronic Instability	Multi-directional laxity (multidirectional)	SH	55	12	SH.55.12	SH.45.51	831	NC13	S43.0	L80	Repetitive - Gradual Onset
3	SHOULDER	Ligament / joint capsule	Chronic Instability	Multi-directional instability (multidirectional)	SH	56	12	SH.56.12	SH.45.12	831	NC13	S43.0	L80	Repetitive - Gradual Onset
3	SHOULDER	Superficial tissues / skin	Contusion (superficial)	Shoulder Contusion	SH	60	24	SH.60.24	SH.00.23	923	NC15.0	S40.0	S16	Acute - Sudden Onset
3	SHOULDER	Superficial tissues / skin	Laceration	Shoulder laceration	SH	60	25	SH.60.25	SH.00.24	873	NC10	S41.0	S18	Acute - Sudden Onset
3	SHOULDER	Superficial tissues / skin	Abrasion	Shoulder abrasion	SH	60	26	SH.60.26	SH.00.25	916	NC10.0	S40.9	S17	Acute - Sudden Onset
3	SHOULDER	Non-specific	Injury without tissue type specified	Other shoulder injury	SH	90	0	SH.90.00	SH.00.00	840.9	NC1	M75.9	L92	Acute - Sudden Onset
3	SHOULDER	Non-specific	Injury without tissue type specified	Scapulothoracic dysfunction	SH	90	42	SH.90.42	SH.61.53	840.9	NC1	S46.9	L81	Repetitive - Gradual Onset
3	SHOULDER	Superficial tissues / skin	Stump injury	shoulder disarticulation stump hematoma	SH	91	23	SH.91.23	NE85.6	955	NC1			Acute - Sudden Onset
3	SHOULDER	Superficial tissues / skin	Stump injury	shoulder disarticulation stump contusion	SH	91	24	SH.91.24	NE85.6	955	NC1			Acute - Sudden Onset
3	SHOULDER	Superficial tissues / skin	Stump injury	shoulder disarticulation stump laceration	SH	91	25	SH.91.25	NE85.6	955	NC1			Acute - Sudden Onset
3	SHOULDER	Superficial tissues / skin	Stump injury	shoulder disarticulation stump maceration	SH	91	26	SH.91.26	NE85.6	955	NC1			Acute - Sudden Onset
3	SHOULDER	Cartilage / synovium / bursa	Stump injury	shoulder disarticulation stump bursitis	SH	91	31	SH.91.31	NE85.6	955	FB50			Repetitive - Gradual Onset
3	SHOULDER	Nervous	Stump injury	shoulder disarticulation stump neuroma	SH	91	41	SH.91.41	NE85.3	955	NC1			Repetitive - Gradual Onset
3	SHOULDER	Nervous	Stump injury	shoulder disarticulation stump pain (including phantom pain)	SH	91	42	SH.91.42	NE85.6	955	NC1			Repetitive - Gradual Onset
4	UPPER ARM	Muscle / tendon	Muscle Injury	Biceps brachii strain	AR	11	7	AR.11.07	AR.11.07	841.8	NC16.20	S46.2	L81	Acute - Sudden Onset
4	UPPER ARM	Muscle / tendon	Muscle Injury	Distal biceps rupture	AR	11	9	AR.11.09	AR.11.09	841.8	NC16	S46.2	L81	Acute - Sudden Onset
4	UPPER ARM	Muscle / tendon	Muscle Injury	Biceps brachii myositis ossificans	AR	11	33	AR.11.33	AR.11.51	841.8	NC16	M61.0	L99	Repetitive - Gradual Onset
4	UPPER ARM	Muscle / tendon	Muscle Injury	Triceps strain	AR	12	7	AR.12.07	AR.12.07	841.8	NC16.30	S46.3	L81	Acute - Sudden Onset
4	UPPER ARM	Muscle / tendon	Muscle Injury	Triceps rupture	AR	12	9	AR.12.09	AR.12.09	841.8	NC16	S46.3	L81	Acute - Sudden Onset
4	UPPER ARM	Nervous	Peripheral nerve injury	Radial nerve injury	AR	21	39	AR.21.39	AR.21.00	955.3	NC14.2	G56.3	N94	Repetitive - Gradual Onset
4	UPPER ARM	Bone	Fracture	Humeral shaft fracture	AR	32	13	AR.32.13	AR.32.13	812.2	NC12.3	S42.3	L76	Acute - Sudden Onset
4	UPPER ARM	Bone	Bone stress injury	Humeral stress fracture	AR	32	18	AR.32.18	AR.32.18	812.2	NC12	S42.3	L76	Repetitive - Gradual Onset
4	UPPER ARM	Superficial tissues / skin	Laceration	Upper arm laceration	AR	60	25	AR.60.25	AR.00.24	873	NC10	S41.1	S18	Acute - Sudden Onset
4	UPPER ARM	Superficial tissues / skin	Abrasion	Upper arm abrasion	AR	60	26	AR.60.26	AR.00.25	916	NC10.0	S40.9	S17	Acute - Sudden Onset
4	UPPER ARM	Non-specific	Injury without tissue type specified	Other arm injury	AR	90	0	AR.90.00	AR.00.00	840.8	NC1	T11.9	L81	Acute - Sudden Onset
4	UPPER ARM	Superficial tissues / skin	Contusion (superficial)	Upper Arm Contusion	AR	90	24	AR.90.24	AR.00.23	923	NC10.1	S40.0	S16	Acute - Sudden Onset
4	UPPER ARM	Superficial tissues / skin	Stump injury	trans-humeral (above-elbow) amputation stump hematoma	AR	91	23	AR.91.23	NE85.6	955	NC1			Acute - Sudden Onset
4	UPPER ARM	Superficial tissues / skin	Stump injury	trans-humeral (above-elbow) amputation stump contusion	AR	91	24	AR.91.24	NE85.6	955	NC1			Acute - Sudden Onset
4	UPPER ARM	Superficial tissues / skin	Stump injury	trans-humeral (above-elbow) amputation stump laceration	AR	91	25	AR.91.25	NE85.6	955	NC1			Acute - Sudden Onset
4	UPPER ARM	Superficial tissues / skin	Stump injury	trans-humeral (above-elbow) amputation stump maceration	AR	91	26	AR.91.26	NE85.6	955	NC1			Acute - Sudden Onset
4	UPPER ARM	Cartilage / synovium / bursa	Stump injury	trans-humeral (above-elbow) amputation stump bursitis	AR	91	31	AR.91.31	NE85.6	955	FB50			Repetitive - Gradual Onset
4	UPPER ARM	Nervous	Stump injury	trans-humeral (above-elbow) amputation stump neuroma	AR	91	41	AR.91.41	NE85.3	955	NC1			Repetitive - Gradual Onset
4	UPPER ARM	Nervous	Stump injury	trans-humeral (above-elbow) amputation stump pain (including phantom pain)	AR	91	42	AR.91.42	NE85.6	955	NC1			Repetitive - Gradual Onset
5	ELBOW	Muscle / tendon	Tendinopathy	Lateral epicondyopathy (tennis elbow)	EL	11	28	EL.11.28	EL.11.26	726.3	FB55.1	M77.1	L93	Repetitive - Gradual Onset
5	ELBOW	Muscle / tendon	Tendinopathy	Medial epicondylopathy (golfers' elbow)	EL	12	28	EL.12.28	EL.12.26	726.3	FB55.0	M77.0	L87	Repetitive - Gradual Onset
5	ELBOW	Muscle / tendon	Tendinopathy	Triceps tendinopathy	EL	13	28	EL.13.28	EL.13.26	726.3		M75.8	L92	Repetitive - Gradual Onset
5	ELBOW	Muscle / tendon	Tendinopathy	Biceps tendinopathy	EL	14	28	EL.14.28	EL.14.26	726.3		M75.2	L92	Repetitive - Gradual Onset
5	ELBOW	Nervous	Peripheral nerve injury	Elbow neuroma	EL	20	41	EL.20.41	EL.20.44	955.7	NC34	G56.8	N94	Repetitive - Gradual Onset
5	ELBOW	Nervous	Peripheral nerve injury	Elbow reflex sympathetic dystrophy	EL	20	43	EL.20.43	EL.20.41	955.7	NC34	M89.0	L99	Repetitive - Gradual Onset
5	ELBOW	Nervous	Peripheral nerve injury	Ulnar nerve subluxation	EL	21	39	EL.21.39	EL.21.11	955.2	NC34	S54.0	N81	Repetitive - Gradual Onset
5	ELBOW	Nervous	Peripheral nerve injury	Entrapment neuropathy / javelin elbow	EL	22	39	EL.22.39	EL.21.51	955.2	NC34	S54.9	N81	Repetitive - Gradual Onset
5	ELBOW	Nervous	Peripheral nerve injury	Median nerve injury	EL	23	39	EL.23.39	EL.22.00	955.1	NC14.1	S54.1	N81	Repetitive - Gradual Onset
5	ELBOW	Nervous	Peripheral nerve injury	Radial nerve injury	EL	24	39	EL.24.39	EL.23.00	955.3	NC14.2	S54.2	N81	Repetitive - Gradual Onset
5	ELBOW	Nervous	Peripheral nerve injury	Posterior interosseous nerve entraptment	EL	25	39	EL.25.39	EL.24.51	955.3	NC34	S54.8	N81	Repetitive - Gradual Onset
5	ELBOW	Bone	Fracture	Supracondylar humeral fracture	EL	32	13	EL.32.13	EL.32.13	812.4	NC12.4	S42.4	L76	Acute - Sudden Onset
5	ELBOW	Bone	Fracture	Medial epicondyle avulsion fracture	EL	33	14	EL.33.14	EL.33.14	812.4	NC12.4	S42.4	L76	Acute - Sudden Onset
5	ELBOW	Bone	Physis injury	Medial epicondyle growth plate / physeal injury	EL	33	20	EL.33.20	EL.33.20	812.4	NC12.4	S42.4	L76	Acute - Sudden Onset
5	ELBOW	Bone	Bone contusion	Medial epicondyle contusion	EL	33	24	EL.33.24	EL.12.23	726.3	NC30.1	S50.0	S16	Acute - Sudden Onset
5	ELBOW	Bone	Fracture	Lateral epicondyle avulsion fracture	EL	34	14	EL.34.14	EL.34.14	812.4	NC12.4	S42.4	L76	Acute - Sudden Onset
5	ELBOW	Bone	Physis injury	Lateral epicondyle growth plate / physeal injury	EL	34	20	EL.34.20	EL.34.20	812.4	NC12.4	S42.4	L76	Acute - Sudden Onset
5	ELBOW	Bone	Bone contusion	Lateral epicondyle contusion	EL	34	24	EL.34.24	EL.11.23	726.3	NC30.1	S50.0	S16	Acute - Sudden Onset
5	ELBOW	Bone	Fracture	Radial head fracture	EL	35	13	EL.35.13	EL.35.13	813	NC32.5	S52.1	L72	Acute - Sudden Onset
5	ELBOW	Bone	Fracture	Coronoid fracture	EL	36	13	EL.36.13	EL.36.13	813	NC12.4	S52.0	L72	Acute - Sudden Onset
5	ELBOW	Bone	Fracture	Olecranon avulsion fracture	EL	37	14	EL.37.14	EL.37.14	813	NC32.0	S52.0	L72	Acute - Sudden Onset
5	ELBOW	Cartilage / synovium / bursa	Synovitis / capsulitis	Humero-ulnar Impingement Syndrome	EL	41	30	EL.41.30	EL.41.51	841.8	NC36	S53.4	L79	Repetitive - Gradual Onset
5	ELBOW	Cartilage / synovium / bursa	Bursitis	Olecranon bursitis	EL	41	31	EL.41.31	EL.61.29	841.8	NC36.7	M70.2	L87	Repetitive - Gradual Onset
5	ELBOW	Cartilage / synovium / bursa	Arthritis	Humero-ulnar degenerative/osteoarthritis	EL	41	34	EL.41.34	EL.41.32	715.1	FA0	M19.8	L91	Repetitive - Gradual Onset
5	ELBOW	Cartilage / synovium / bursa	Arthritis	Humero-radial degenerative arthritis	EL	42	34	EL.42.34	EL.42.32	715.1	FA0	M19.8	L91	Repetitive - Gradual Onset
5	ELBOW	Cartilage / synovium / bursa	Cartilage	Little league elbow / osetochondritis dissecans	EL	42	37	EL.42.37	EL.42.40	841.8	NC36	M93.2	L94	Repetitive - Gradual Onset
5	ELBOW	Cartilage / synovium / bursa	Injury without tissue type specified	Radio-ulnar joint disorder	EL	43	0	EL.43.00	EL.43.00	841.8	ME86.4	S53.4	L79	Acute - Sudden Onset
5	ELBOW	Cartilage / synovium / bursa	Cartilage	Elbow Loose body	EL	43	21	EL.43.21	EL.43.51	718.3	NC36	M24.0	L99	Repetitive - Gradual Onset
5	ELBOW	Ligament / joint capsule	Joint Sprain	Elbow sprain -ill defined	EL	50	1	EL.50.01	EL.40.01	841.8	NC33.Z	S53.4	L79	Acute - Sudden Onset
5	ELBOW	Ligament / joint capsule	Joint Sprain	Elbow dislocation	EL	50	10	EL.50.10	EL.40.10	832	NC33.1	S53.1	L80	Acute - Sudden Onset
5	ELBOW	Ligament / joint capsule	Joint Sprain	Ulnar collateral ligament 1° sprain -acute	EL	51	1	EL.51.01	EL.51.01	841.1	NC33	S53.3	L79	Acute - Sudden Onset
5	ELBOW	Ligament / joint capsule	Joint Sprain	Ulnar collateral ligament 2° sprain -acute	EL	51	2	EL.51.02	EL.51.02	841.1	NC33	S53.3	L79	Acute - Sudden Onset
5	ELBOW	Ligament / joint capsule	Joint Sprain	Ulnar collateral ligament 3° sprain -acute	EL	51	3	EL.51.03	EL.51.03	841.1	NC33	S53.3	L79	Acute - Sudden Onset
5	ELBOW	Ligament / joint capsule	Joint Sprain	Ulnar collateral ligament 1° sprain -chronic	EL	51	4	EL.51.04	EL.51.04	841.1	NC33	S53.3	L79	Repetitive - Gradual Onset
5	ELBOW	Ligament / joint capsule	Joint Sprain	Ulnar collateral ligament 2° sprain -chronic	EL	51	5	EL.51.05	EL.51.05	841.1	NC33	S53.3	L79	Repetitive - Gradual Onset
5	ELBOW	Ligament / joint capsule	Joint Sprain	Ulnar collateral ligament 3° sprain -chronic	EL	51	6	EL.51.06	EL.51.06	841.1	NC33	S53.3	L79	Repetitive - Gradual Onset
5	ELBOW	Ligament / joint capsule	Joint Sprain	Annular ligament Injury	EL	52	1	EL.52.01	EL.52.01	841.8	NC33.Z	S53.4	L79	Acute - Sudden Onset
5	ELBOW	Superficial tissues / skin	Contusion (superficial)	Elbow contusion	EL	60	24	EL.60.24	EL.00.23	841.8	NC30.1	S50.0	S16	Acute - Sudden Onset
5	ELBOW	Superficial tissues / skin	Laceration	Elbow laceration	EL	60	25	EL.60.25	EL.00.24	873	NC30.1	S51.0	S18	Acute - Sudden Onset
5	ELBOW	Superficial tissues / skin	Abrasion	Elbow abrasion	EL	60	26	EL.60.26	EL.00.25	916	NC30.0	S50.9	S17	Acute - Sudden Onset
5	ELBOW	Non-specific	Injury without tissue type specified	Other elbow injury	EL	90	0	EL.90.00	EL.00.00	841.9	NC30.1	S59 .8	L81	Acute - Sudden Onset
5	ELBOW	Superficial tissues / skin	Stump injury	elbow disarticulation stump hematoma	EL	91	23	EL.91.23	NE85.6	955				Acute - Sudden Onset
5	ELBOW	Superficial tissues / skin	Stump injury	elbow disarticulation stump contusion	EL	91	24	EL.91.24	NE85.6	955				Acute - Sudden Onset
5	ELBOW	Superficial tissues / skin	Stump injury	elbow disarticulation stump laceration	EL	91	25	EL.91.25	NE85.6	955				Acute - Sudden Onset
5	ELBOW	Superficial tissues / skin	Stump injury	elbow disarticulation stump maceration	EL	91	26	EL.91.26	NE85.6	955				Acute - Sudden Onset
5	ELBOW	Cartilage / synovium / bursa	Stump injury	elbow disarticulation stump bursitis	EL	91	31	EL.91.31	NE85.6	955	FB50			Repetitive - Gradual Onset
5	ELBOW	Nervous	Stump injury	elbow disarticulation stump neuroma	EL	91	41	EL.91.41	NE85.3	955				Repetitive - Gradual Onset
5	ELBOW	Nervous	Stump injury	elbow disarticulation stump pain (including phantom pain)	EL	91	42	EL.91.42	NE85.6	955				Repetitive - Gradual Onset
6	FOREARM	Muscle / tendon	Muscle compartment syndrome	Forearm exertional compartment syndrome	FA	10	36	FA.10.36	FA.81.36	841.9	NC36	M62.2	L99	Repetitive - Gradual Onset
6	FOREARM	Muscle / tendon	Muscle Injury	Forearm flexor muscle strain	FA	11	7	FA.11.07	FA.11.07	841.8	NC36.20	S56.7	L81	Acute - Sudden Onset
6	FOREARM	Muscle / tendon	Muscle Injury	Forearm extensor muscle strain	FA	12	7	FA.12.07	FA.12.07	841.8	NC36.40	S56.7	L81	Acute - Sudden Onset
6	FOREARM	Muscle / tendon	Muscle Injury	Brachioradialis strain	FA	13	7	FA.13.07	FA.13.07	841.8	NC36.00	S56.2	L81	Acute - Sudden Onset
6	FOREARM	Nervous	Peripheral nerve injury	Forearm reflex sympathetic dystrophy	FA	20	43	FA.20.43	FA.20.41	841.8	NC55	M89.0	L99	Repetitive - Gradual Onset
6	FOREARM	Bone	Fracture	Radius fracture (including Colles')	FA	32	13	FA.32.13	FA.32.13	813.4	NC32.3	S52.5	L72	Acute - Sudden Onset
6	FOREARM	Bone	Fracture	Radius greenstick fracture	FA	32	19	FA.32.19	FA.32.19	813.4	NC32	S52.3	L72	Acute - Sudden Onset
6	FOREARM	Bone	Fracture	Ulnar fracture	FA	33	13	FA.33.13	FA.33.13	813.4	NC32.2	S52.2	L72	Acute - Sudden Onset
6	FOREARM	Superficial tissues / skin	Contusion (superficial)	Forearm Contusion	FA	60	24	FA.60.24	FA.00.23	923.1	NC30.3	S50.1	S16	Acute - Sudden Onset
6	FOREARM	Superficial tissues / skin	Laceration	Forearm laceration	FA	60	25	FA.60.25	FA.00.24	873	NC31	S51.9	S18	Acute - Sudden Onset
6	FOREARM	Superficial tissues / skin	Abrasion	Forearm abrasion	FA	60	26	FA.60.26	FA.00.25	916	NC30.2	S50.9	S17	Acute - Sudden Onset
6	FOREARM	Non-specific	Injury without tissue type specified	Other forearm injury	FA	90	0	FA.90.00	FA.00.00	841.9		S59.9	L81	Acute - Sudden Onset
6	FOREARM	Superficial tissues / skin	Stump injury	trans-radial (below-elbow) amputation stump hematoma	FA	91	23	FA.91.23	NE85.6	955				Acute - Sudden Onset
6	FOREARM	Superficial tissues / skin	Stump injury	trans-radial (below-elbow) amputation stump contusion	FA	91	24	FA.91.24	NE85.6	955				Acute - Sudden Onset
6	FOREARM	Superficial tissues / skin	Stump injury	trans-radial (below-elbow) amputation stump laceration	FA	91	25	FA.91.25	NE85.6	955				Acute - Sudden Onset
6	FOREARM	Superficial tissues / skin	Stump injury	trans-radial (below-elbow) amputation stump maceration	FA	91	26	FA.91.26	NE85.6	955				Acute - Sudden Onset
6	FOREARM	Cartilage / synovium / bursa	Stump injury	trans-radial (below-elbow) amputation stump bursitis	FA	91	31	FA.91.31	NE85.6	955	FB50			Repetitive - Gradual Onset
6	FOREARM	Nervous	Stump injury	trans-radial (below-elbow) amputation stump neuroma	FA	91	41	FA.91.41	NE85.3	955	NC55			Repetitive - Gradual Onset
6	FOREARM	Nervous	Stump injury	trans-radial (below-elbow) amputation stump pain (including phantom pain)	FA	91	42	FA.91.42	NE85.6	955	NC55			Repetitive - Gradual Onset
7	WRIST	Muscle / tendon	Tendinopathy	Wrist extensor tendinopathy	WR	11	28	WR.11.28	WR.11.26	842	NC36.30	M65.8	L87	Repetitive - Gradual Onset
7	WRIST	Muscle / tendon	Tendinopathy	Wrist extensor tenosynovitis	WR	11	29	WR.11.29	WR.11.27	842	FB40	M65.8	L87	Repetitive - Gradual Onset
7	WRIST	Muscle / tendon	Tendinopathy	Wirst flexor tendinopathy	WR	12	28	WR.12.28	WR.12.26	842	NC36.0	M65.8	L87	Repetitive - Gradual Onset
7	WRIST	Muscle / tendon	Tendinopathy	Wrist flexor tenosynovitis	WR	12	29	WR.12.29	WR.12.27	842	FB40	M65.8	L87	Repetitive - Gradual Onset
7	WRIST	Muscle / tendon	Tendinopathy	DeQuervain's Disease	WR	13	28	WR.13.28	WR.13.51	842	NC36.30	M65.4	L87	Repetitive - Gradual Onset
7	WRIST	Muscle / tendon	Tendinopathy	Extensor Carpi Ulnaris Subluxation	WR	14	28	WR.14.28	WR.14.11	833	NC36.30	M66.4	L99	Repetitive - Gradual Onset
7	WRIST	Nervous	Peripheral nerve injury	Wrist neuroma	WR	20	41	WR.20.41	WR.20.44	955.9	NC55	G56.8	N94	Repetitive - Gradual Onset
7	WRIST	Nervous	Peripheral nerve injury	Wrist reflex sympathetic dystrophy	WR	20	43	WR.20.43	WR.20.41	955.9	NC55	M89.0	L99	Repetitive - Gradual Onset
7	WRIST	Nervous	Peripheral nerve injury	Carpal tunnel syndrome	WR	21	39	WR.21.39	WR.21.51	354	NC55	G56.0	N93	Repetitive - Gradual Onset
7	WRIST	Nervous	Peripheral nerve injury	Ulnar nerve entrapment (Tunnel of Guyon)	WR	22	39	WR.22.39	WR.22.52	354.2	NC55	G56.8	N94	Repetitive - Gradual Onset
7	WRIST	Bone	Fracture	Scaphoid fracture	WR	32	13	WR.32.13	WR.32.13	814	NC53.0	S62.0	L74	Acute - Sudden Onset
7	WRIST	Bone	Fracture	Scaphoid fracture-non-union	WR	32	15	WR.32.15	WR.32.15	814	FB80.8	S62.0	L74	Acute - Sudden Onset
7	WRIST	Bone	Avascular necrosis	Scaphoid avascular necrosis	WR	32	35	WR.32.35	WR.32.34	814	NC53.0	M87.2	L99	Repetitive - Gradual Onset
7	WRIST	Bone	Fracture	Lunate fracture	WR	33	13	WR.33.13	WR.33.13	814	NC53.1	S62.1	L74	Acute - Sudden Onset
7	WRIST	Bone	Avascular necrosis	Kienboch's disease	WR	33	35	WR.33.35	WR.33.34	814	NC53.1	M93.1	L94	Repetitive - Gradual Onset
7	WRIST	Bone	Fracture	Triquetrium fracture	WR	34	13	WR.34.13	WR.34.13	814	NC53.1	S62.1	L74	Acute - Sudden Onset
7	WRIST	Bone	Fracture	Pisiform fracture	WR	35	13	WR.35.13	WR.35.13	814	NC53.1	S62.1	L74	Acute - Sudden Onset
7	WRIST	Bone	Fracture	Trapezium fracture	WR	36	13	WR.36.13	WR.36.13	814	NC53.1	S62.1	L74	Acute - Sudden Onset
7	WRIST	Bone	Fracture	Trapezoid fracture	WR	37	13	WR.37.13	WR.37.13	814	NC53.1	S62.1	L74	Acute - Sudden Onset
7	WRIST	Bone	Fracture	Capitate fracture	WR	38	13	WR.38.13	WR.38.13	814	NC53.1	S62.1	L74	Acute - Sudden Onset
7	WRIST	Bone	Fracture	Hamate fracture	WR	39	13	WR.39.13	WR.39.13	814	NC53.1	S62.1	L74	Acute - Sudden Onset
7	WRIST	Bone	Fracture	Hook of hamate fracture	WR	39	14	WR.39.14	WR.39.14	814	NC53.1	S62.1	L74	Acute - Sudden Onset
7	WRIST	Cartilage / synovium / bursa	Synovitis / capsulitis	Wrist capsulitis	WR	40	30	WR.40.30	WR.49.31	842		M77.9	L87	Repetitive - Gradual Onset
7	WRIST	Cartilage / synovium / bursa	Synovitis / capsulitis	Wrist impingement	WR	40	33	WR.40.33	WR.80.51	842		M77.9	L87	Repetitive - Gradual Onset
7	WRIST	Cartilage / synovium / bursa	Synovitis / capsulitis	Wrist degenerative/osteoarthritis	WR	40	34	WR.40.34	WR.40.32	715.1	FA02	M19.8	L91	Repetitive - Gradual Onset
7	WRIST	Cartilage / synovium / bursa	Synovitis / capsulitis	Dorsal wrist ganglion	WR	41	30	WR.41.30	WR.81.51	842		M67.4	L87	Repetitive - Gradual Onset
7	WRIST	Cartilage / synovium / bursa	Synovitis / capsulitis	Volar wrist ganglion	WR	42	30	WR.42.30	WR.82.51	842		M67.4	L87	Repetitive - Gradual Onset
7	WRIST	Cartilage / synovium / bursa	Cartilage	Triangular fibrocartillage complex tear	WR	48	21	WR.48.21	WR.48.09	718.8		S63.5	L79	Acute - Sudden Onset
7	WRIST	Ligament / joint capsule	Joint Sprain	Wrist sprain	WR	50	1	WR.50.01	WR.40.01	842	NC54	S63.5	L79	Acute - Sudden Onset
7	WRIST	Ligament / joint capsule	Joint Sprain	Distal radio-ulnar joint dislocation	WR	51	10	WR.51.10	WR.41.10	833	NC54.00	S63.0	L80	Acute - Sudden Onset
7	WRIST	Ligament / joint capsule	Chronic Instability	Distal radio-ulnar joint instablility	WR	51	12	WR.51.12	WR.41.12	833	NC54.00	M25.3	L99	Repetitive - Gradual Onset
7	WRIST	Ligament / joint capsule	Joint Sprain	Scapholunate dissociation	WR	52	10	WR.52.10	WR.42.10	833	NC54.02	S63.0	L80	Acute - Sudden Onset
7	WRIST	Ligament / joint capsule	Chronic Instability	Scapholunate instability	WR	52	12	WR.52.12	WR.43.12	833	NC54.02	M25.3	L99	Repetitive - Gradual Onset
7	WRIST	Ligament / joint capsule	Joint Sprain	Lunate dislocation	WR	53	10	WR.53.10	WR.44.10	833	NC54.02	S63.0	L80	Acute - Sudden Onset
7	WRIST	Ligament / joint capsule	Joint Sprain	Scapholunate DISI/VISI	WR	54	11	WR.54.11	WR.45.11	833	NC54.02	S63.0	L80	Acute - Sudden Onset
7	WRIST	Ligament / joint capsule	Joint Sprain	Pisotriquetral joint injury	WR	55	1	WR.55.01	WR.46.00	833	NC54.02	S63.0	L80	Acute - Sudden Onset
7	WRIST	Ligament / joint capsule	Chronic Instability	Mid-carpal instability	WR	56	12	WR.56.12	WR.47.12	833	NC54.02	M25.3	L99	Repetitive - Gradual Onset
7	WRIST	Superficial tissues / skin	Contusion (superficial)	Wrist contusion	WR	60	24	WR.60.24	WR.00.23	923.2	NC51.10	S60.2	S16	Acute - Sudden Onset
7	WRIST	Superficial tissues / skin	Laceration	Wrist laceration	WR	60	25	WR.60.25	WR.00.24	873	NC52.10	S61.9	S18	Acute - Sudden Onset
7	WRIST	Superficial tissues / skin	Abrasion	Wrist abrasion	WR	60	26	WR.60.26	WR.00.25	916	NC52.10	S60.9	S17	Acute - Sudden Onset
7	WRIST	Non-specific	Injury without tissue type specified	Other wrist injury	WR	90	0	WR.90.00	WR.00.00	842		S69.9	L81	Acute - Sudden Onset
7	WRIST	Superficial tissues / skin	Stump injury	wrist disarticulation stump hematoma	WR	91	23	WR.91.23	NE85.6	955				Acute - Sudden Onset
7	WRIST	Superficial tissues / skin	Stump injury	wrist disarticulation stump contusion	WR	91	24	WR.91.24	NE85.6	955				Acute - Sudden Onset
7	WRIST	Superficial tissues / skin	Stump injury	wrist disarticulation stump laceration	WR	91	25	WR.91.25	NE85.6	955				Acute - Sudden Onset
7	WRIST	Superficial tissues / skin	Stump injury	wrist disarticulation stump maceration	WR	91	26	WR.91.26	NE85.6	955				Acute - Sudden Onset
7	WRIST	Cartilage / synovium / bursa	Stump injury	wrist disarticulation stump bursitis	WR	91	31	WR.91.31	NE85.6	955	FB50			Repetitive - Gradual Onset
7	WRIST	Nervous	Stump injury	wrist disarticulation stump neuroma	WR	91	41	WR.91.41	NE85.3	955	NC55			Repetitive - Gradual Onset
7	WRIST	Nervous	Stump injury	wrist disarticulation stump pain (including phantom pain)	WR	91	42	WR.91.42	NE85.6	955	NC55			Repetitive - Gradual Onset
8	HAND	Muscle / tendon	Tendon Rupture	Extensor expansion tendon tear/rupture	HA	11	9	HA.11.09	HA.11.09	842.1	NC57.0	S63.4	L79	Acute - Sudden Onset
8	HAND	Muscle / tendon	Laceration	Extensor expansion tendon laceration	HA	11	25	HA.11.25	HA.11.24	883	NC51.00	S66.3	L81	Acute - Sudden Onset
8	HAND	Muscle / tendon	Tendon Rupture	Flexor digitorum superficialus tear/rupture	HA	12	9	HA.12.09	HA.12.09	842.1	NC57.2	M66.3	L99	Acute - Sudden Onset
8	HAND	Muscle / tendon	Tendinopathy	Trigger finger	HA	12	28	HA.12.28	HA.12.51	842.1	FB40.4	M65.3	L87	Repetitive - Gradual Onset
8	HAND	Muscle / tendon	Tendon Rupture	Flexor digitorum profundus tear/rupture	HA	13	9	HA.13.09	HA.13.09	842.1	NC57.0	M66.3	L99	Acute - Sudden Onset
8	HAND	Muscle / tendon	Tendinopathy	Dupuytren's contacture	HA	14	28	HA.14.28	HA.14.51	842.1		M72.0	L87	Repetitive - Gradual Onset
8	HAND	Muscle / tendon	Muscle Injury	Intrinsic muscle strain	HA	15	7	HA.15.07	HA.15.07	842.1	NC57	S66.8	L81	Acute - Sudden Onset
8	HAND	Nervous	Peripheral nerve injury	Hand reflex sympathetic dystrophy	HA	20	43	HA.20.43	HA.20.41	842.1	NC55	M89.0	L99	Repetitive - Gradual Onset
8	HAND	Bone	Fracture	First metacarpal fracture	HA	32	13	HA.32.13	HA.32.13	815	NC53.2	S62.2	L74	Acute - Sudden Onset
8	HAND	Bone	Fracture	First metacarpal fracture/dislocation (Bennett's)	HA	32	16	HA.32.16	HA.32.16	815	NC53.2	S62.2	L74	Acute - Sudden Onset
8	HAND	Bone	Fracture	Second metacarpal fracture	HA	33	13	HA.33.13	HA.33.13	815	NC53.3	S62.3	L74	Acute - Sudden Onset
8	HAND	Bone	Fracture	Other metacarpal fracture	HA	34	13	HA.34.13	HA.34.13	815	NC53.3	S62.8	L74	Acute - Sudden Onset
8	HAND	Bone	Fracture	Thumb phalanx fracture	HA	35	13	HA.35.13	HA.35.13	815	NC53.5	S62.5	L74	Acute - Sudden Onset
8	HAND	Bone	Fracture	Proximal phalyngeal fracture of fingers	HA	36	13	HA.36.13	HA.36.13	815	NC53.6Y	S62.6	L74	Acute - Sudden Onset
8	HAND	Bone	Fracture	Middle phalyngeal fracture of fingers	HA	37	13	HA.37.13	HA.37.13	815	NC53.6Y	S62.6	L74	Acute - Sudden Onset
8	HAND	Bone	Fracture	Distal phalyngeal fracture of fingers	HA	38	13	HA.38.13	HA.38.13	815	NC53.6Y	S62.6	L74	Acute - Sudden Onset
8	HAND	Ligament / joint capsule	Joint Sprain	Ulnar collateral ligament 1° sprain -acute (skier's thumb)	HA	51	1	HA.51.01	HA.51.01	842.1	NC54	S63.7	L79	Acute - Sudden Onset
8	HAND	Ligament / joint capsule	Joint Sprain	Ulnar collateral ligament 2° sprain -acute (skier's thumb)	HA	51	2	HA.51.02	HA.51.02	842.1	NC54	S63.7	L79	Acute - Sudden Onset
8	HAND	Ligament / joint capsule	Joint Sprain	Ulnar collateral ligament 3° sprain -acute (skier's thumb)	HA	51	3	HA.51.03	HA.51.03	842.1	NC54	S63.7	L79	Acute - Sudden Onset
8	HAND	Ligament / joint capsule	Joint Sprain	Ulnar collateral ligament 1° sprain -chronic	HA	51	4	HA.51.04	HA.51.04	842.1	NC54	S63.7	L79	Repetitive - Gradual Onset
8	HAND	Ligament / joint capsule	Joint Sprain	Ulnar collateral ligament 2° sprain -chronic	HA	51	5	HA.51.05	HA.51.05	842.1	NC54	S63.7	L79	Repetitive - Gradual Onset
8	HAND	Ligament / joint capsule	Joint Sprain	Ulnar collateral ligament 3° sprain -chronic	HA	51	6	HA.51.06	HA.51.06	842.1	NC54	S63.7	L79	Repetitive - Gradual Onset
8	HAND	Ligament / joint capsule	Joint Sprain	First metacarpophalyngeal joint dislocation	HA	51	10	HA.51.10	HA.42.10	834	NC54.20	S63.1	L80	Acute - Sudden Onset
8	HAND	Ligament / joint capsule	Joint Sprain	Other metacarpophalyngeal joint dislocation	HA	52	10	HA.52.10	HA.41.10	834	NC54.20	S63.1	L80	Acute - Sudden Onset
8	HAND	Ligament / joint capsule	Joint Sprain	Other metacarpophalyngeal joint sprain	HA	53	1	HA.53.01	HA.52.01	842.1	NC54.80	S63.6	L79	Acute - Sudden Onset
8	HAND	Ligament / joint capsule	Joint Sprain	Thumb interphalyngeal joint dislocation	HA	54	10	HA.54.10	HA.43.10	834	NC54.11	S63.1	L80	Acute - Sudden Onset
8	HAND	Ligament / joint capsule	Joint Sprain	Finger proximal interphalyngeal joint sprain	HA	55	1	HA.55.01	HA.53.01	842.1	NC54.81	S63.6	L79	Acute - Sudden Onset
8	HAND	Ligament / joint capsule	Joint Sprain	Finger proximal interphalyngeal joint dislocation	HA	55	10	HA.55.10	HA.45.10	834	NC54.21	S63.1	L80	Acute - Sudden Onset
8	HAND	Ligament / joint capsule	Joint Sprain	Finger distal interphalyngeal joint sprain	HA	56	1	HA.56.01	HA.54.01	842.1	NC54.81	S63.6	L79	Acute - Sudden Onset
8	HAND	Ligament / joint capsule	Joint Sprain	Finger distal interphalyngeal joint dislocation	HA	56	10	HA.56.10	HA.44.10	834	NC54.21	S63.1	L80	Acute - Sudden Onset
8	HAND	Superficial tissues / skin	Contusion (superficial)	Hand contusion	HA	60	24	HA.60.24	HA.00.23	923.2	NC56.4	S60.2	S16	Acute - Sudden Onset
8	HAND	Superficial tissues / skin	Laceration	Hand laceration	HA	60	25	HA.60.25	HA.00.24	873	NC52.02	S61.9	S18	Acute - Sudden Onset
8	HAND	Superficial tissues / skin	Abrasion	Hand abrasion	HA	60	26	HA.60.26	HA.00.25	916	NC51.00	S60.9	S17	Acute - Sudden Onset
8	HAND	Superficial tissues / skin	Abrasion	Hand blister	HA	60	27	HA.60.27	HA.81.45	919.2	NC51	S60.8	S17	Acute - Sudden Onset
8	HAND	Superficial tissues / skin	Abrasion	Finger blister	HA	61	27	HA.61.27	HA.82.45	919.2	NC51	S60.8	S17	Acute - Sudden Onset
8	HAND	Superficial tissues / skin	Injury without tissue type specified	Other finger nail injury	HA	62	0	HA.62.00	HA.80.54	842.1		S69.8	L81	Acute - Sudden Onset
8	HAND	Superficial tissues / skin	Injury without tissue type specified	Nail avulsion	HA	62	9	HA.62.09	HA.80.52	842.1		S69.8	L81	Acute - Sudden Onset
8	HAND	Superficial tissues / skin	Contusion (superficial)	Subungal hematoma	HA	62	24	HA.62.24	HA.80.51	842.1	NC51.01	S69.8	L81	Acute - Sudden Onset
8	HAND	Non-specific	Injury without tissue type specified	Other hand injury	HA	90	0	HA.90.00	HA.00.00	842.1		S69.9	L81	Acute - Sudden Onset
8	HAND	Superficial tissues / skin	Stump injury	partial hand amputation stump hematoma	HA	91	23	HA.91.23	NE85.6	955				Acute - Sudden Onset
8	HAND	Superficial tissues / skin	Stump injury	partial hand amputation stump contusion	HA	91	24	HA.91.24	NE85.6	955				Acute - Sudden Onset
8	HAND	Superficial tissues / skin	Stump injury	partial hand amputation stump laceration	HA	91	25	HA.91.25	NE85.6	955				Acute - Sudden Onset
8	HAND	Superficial tissues / skin	Stump injury	partial hand amputation stump maceration	HA	91	26	HA.91.26	NE85.6	955				Acute - Sudden Onset
8	HAND	Cartilage / synovium / bursa	Stump injury	partial hand amputation stump bursitis	HA	91	31	HA.91.31	NE85.6	955	FB50			Repetitive - Gradual Onset
8	HAND	Nervous	Stump injury	partial hand amputation stump neuroma	HA	91	41	HA.91.41	NE85.3	955	NC55			Repetitive - Gradual Onset
8	HAND	Nervous	Stump injury	partial hand amputation stump pain (including phantom pain)	HA	91	42	HA.91.42	NE85.6	955	NC55			Repetitive - Gradual Onset
9	CHEST	Muscle / tendon	Muscle Injury	Intercostal muscle strain	CH	11	7	CH.11.07	TR.11.07	847.1	NA83	S29.0	A81	Acute - Sudden Onset
9	CHEST	Muscle / tendon	Muscle Injury	Serratus anterior strain	CH	12	7	CH.12.07	TR.12.07	847.1	NA8	S29.0	A81	Acute - Sudden Onset
9	CHEST	Muscle / tendon	Muscle Injury	Latissimus dorsi strain	CH	13	7	CH.13.07	TR.13.07	847.1	NA8	S29.0	A81	Acute - Sudden Onset
9	CHEST	Bone	Fracture	Rib fracture	CH	32	13	CH.32.13	TR.32.13	847.1	NA82.3	S22.3	L76	Acute - Sudden Onset
9	CHEST	Bone	Bone stress injury	Rib stress fracture	CH	32	18	CH.32.18	TR.32.18	847.1	NA82	S22.3	L76	Repetitive - Gradual Onset
9	CHEST	Bone	Bone contusion	Rib contusion	CH	32	24	CH.32.24	TR.32.23	847.1	NA8	S20.2	S16	Acute - Sudden Onset
9	CHEST	Bone	Fracture	Sternum / xyphoid fracture	CH	33	13	CH.33.13	TR.33.13	847.1	NA82.2	S22.2	L76	Acute - Sudden Onset
9	CHEST	Cartilage / synovium / bursa	Synovitis / capsulitis	Rib cartilage Injury / costochondritis	CH	44	30	CH.44.30	TR.44.31	847.1	NA8	M94.0	L99	Repetitive - Gradual Onset
9	CHEST	Ligament / joint capsule	Joint Sprain	Rib anterior displacement/subluxation	CH	51	11	CH.51.11	TR.32.11	847.1	NA83	S23.2	L80	Acute - Sudden Onset
9	CHEST	Superficial tissues / skin	Contusion (superficial)	Thoracic contusion	CH	60	24	CH.60.24	TR.00.23	922.1	NA80.1	S20.2	S16	Acute - Sudden Onset
9	CHEST	Superficial tissues / skin	Laceration	Chest laceration	CH	60	25	CH.60.25	TR.00.24	873	NA81	S21.9	S18	Acute - Sudden Onset
9	CHEST	Superficial tissues / skin	Abrasion	Chest abrasion	CH	60	26	CH.60.26	TR.00.25	916	NA80.0	S20.8	S17	Acute - Sudden Onset
9	CHEST	Internal organs	Organ Trauma	Pnuemothorax - Traumatic	CH	80	46	CH.80.46	TR.00.51	512	NB31	S27.0	R88	Acute - Sudden Onset
9	CHEST	Non-specific	Injury without tissue type specified	Other chest injury	CH	90	0	CH.90.00	TR.00.00	847.1	NA8	S29.9	L81	Acute - Sudden Onset
10	THORACIC SPINE	Muscle / tendon	Muscle Injury	Postural Dysfunction	TS	10	42	TS.10.42	TR.80.51	737.2	NA8	M43.9	L85	Repetitive - Gradual Onset
10	THORACIC SPINE	Muscle / tendon	Muscle Injury	Parathoracic muscle strain	TS	11	7	TS.11.07	TR.14.07	847.1	NA8	S29.0	A81	Acute - Sudden Onset
10	THORACIC SPINE	Nervous	Peripheral nerve injury	Thoracic neuroma	TS	20	41	TS.20.41	TR.20.44	956.5	NA9	G58.0	N94	Repetitive - Gradual Onset
10	THORACIC SPINE	Nervous	Peripheral nerve injury	Thoracic reflex sympathetic dystrophy	TS	20	43	TS.20.43	TR.20.41	956.5	NA9	M89.0	L99	Repetitive - Gradual Onset
10	THORACIC SPINE	Nervous	Brain & spinal cord injury	Thoracic spinal contusion/concussion	TS	21	40	TS.21.40	TR.21.23	956.5	NA90	S20.2	S16	Acute - Sudden Onset
10	THORACIC SPINE	Nervous	Brain & spinal cord injury	Thoracic spinal cord compression/transection	TS	22	40	TS.22.40	TR.21.10	956.5	NB00	S24.0	N81	Acute - Sudden Onset
10	THORACIC SPINE	Bone	Fracture	Thoracic Spine fracture	TS	31	13	TS.31.13	TR.31.13	805.2	NA82.1	S22.0	L76	Acute - Sudden Onset
10	THORACIC SPINE	Bone	Physis injury	Scheurmann's disease	TS	31	20	TS.31.20	TR.31.20	847.1	NA8	M42.0	L94	Acute - Sudden Onset
10	THORACIC SPINE	Bone	Injury without tissue type specified	Scoliosis or Kyphosis	TS	31	38	TS.31.38	TR.31.53	737.1	FA70	M41.9	L85	Repetitive - Gradual Onset
10	THORACIC SPINE	Cartilage / synovium / bursa	Synovitis / capsulitis	Thoracic facet syndrome	TS	41	30	TS.41.30	TR.41.51	722.5	ME84.1	M47.9	L84	Repetitive - Gradual Onset
10	THORACIC SPINE	Cartilage / synovium / bursa	Synovitis / capsulitis	Costovertebral dysfunction	TS	43	30	TS.43.30	TR.43.51	722.1	NA8	M99.0	L99	Repetitive - Gradual Onset
10	THORACIC SPINE	Ligament / joint capsule	Injury without tissue type specified	Thoracic disc herniation	TS	52	33	TS.52.33	TR.42.52	722.1	FA80.5	M51.2	L84	Repetitive - Gradual Onset
10	THORACIC SPINE	Ligament / joint capsule	Injury without tissue type specified	Thoracic degenerative disc disease	TS	52	42	TS.52.42	TR.42.51	722.5	FA80.4	M47.9	L84	Repetitive - Gradual Onset
11	ABDOMEN	Muscle / tendon	Muscle Injury	Abdominal "stitch" / exercise induced diaphragmatic spasm	AB	10	8	AB.10.08	AB.10.08	789	NB	R10.4	D01	Acute - Sudden Onset
11	ABDOMEN	Muscle / tendon	Muscle Injury	Rectus Abdominus strain	AB	11	7	AB.11.07	AB.11.07	847.2	NB	S39.0	A81	Acute - Sudden Onset
11	ABDOMEN	Muscle / tendon	Muscle Injury	Diastasis Rectii	AB	11	9	AB.11.09	AB.11.51	847.2	NB	S39.8	A81	Acute - Sudden Onset
11	ABDOMEN	Muscle / tendon	Muscle Injury	Abdominal wall strain	AB	12	7	AB.12.07	AB.12.07	847.2	NB	S39.8	S16	Acute - Sudden Onset
11	ABDOMEN	Superficial tissues / skin	Laceration	Abdomen laceration	AB	60	25	AB.60.25	AB.00.24	873	NB51	S31.8	S18	Acute - Sudden Onset
11	ABDOMEN	Superficial tissues / skin	Abrasion	Abdomen abrasion	AB	60	26	AB.60.26	AB.00.25	916	NB51.0	S30.9	S17	Acute - Sudden Onset
11	ABDOMEN	Internal Organs	Organ Trauma	Liver contusion / injury	AB	81	46	AB.81.46	AB.01.23	864	NB91.1	S36.1	D80	Acute - Sudden Onset
11	ABDOMEN	Internal Organs	Organ Trauma	Spleen contusion / injury	AB	82	46	AB.82.46	AB.02.23	865	NB91.0	S36.0	B76	Acute - Sudden Onset
11	ABDOMEN	Internal Organs	Organ Trauma	Kidney Contusion	AB	83	46	AB.83.46	AB.03.23	866	NB92.0	S37.0	U80	Acute - Sudden Onset
11	ABDOMEN	Non-specific	Injury without tissue type specified	Other abdominal injury	AB	90	0	AB.90.00	AB.00.00	843.8	NB	S39.9	A80	Acute - Sudden Onset
12	LUMBOSACRAL SPINE	Muscle / tendon	Muscle Injury	Paralumbar muscle strain	LS	13	7	LS.13.07	LP.13.07	847.2	NB94.1	S33.5	L84	Acute - Sudden Onset
12	LUMBOSACRAL SPINE	Nervous	Peripheral nerve injury	Lumbar neuroma	LS	20	41	LS.20.41	LP.20.44	956.5		G56.8	N94	Repetitive - Gradual Onset
12	LUMBOSACRAL SPINE	Nervous	Peripheral nerve injury	Lumbar reflex sympathetic dystrophy	LS	20	43	LS.20.43	LP.20.41	956.5		M89.0	L99	Repetitive - Gradual Onset
12	LUMBOSACRAL SPINE	Nervous	Peripheral nerve injury	Sciatica	LS	21	39	LS.21.39	LP.21.51	956.5	ME84.3	M51.1	L86	Repetitive - Gradual Onset
12	LUMBOSACRAL SPINE	Nervous	Brain & spinal cord injury	Lumbar spinal contusion/concussion	LS	21	40	LS.21.40	LP.21.23	956.5		S30.0	S16	Acute - Sudden Onset
12	LUMBOSACRAL SPINE	Nervous	Peripheral nerve injury	Lumbar nerve root impingement	LS	22	39	LS.22.39	LP.21.52	956.5	NB70	M51.1	L86	Repetitive - Gradual Onset
12	LUMBOSACRAL SPINE	Nervous	Brain & spinal cord injury	Lumbar spinal cord compression/transection	LS	22	40	LS.22.40	LP.21.10	956.5	NB70	S34.0	N81	Acute - Sudden Onset
12	LUMBOSACRAL SPINE	Nervous	Peripheral nerve injury	Pudendal nerve injury	LS	23	39	LS.23.39	LP.22.00	956.5		S74.8	N81	Repetitive - Gradual Onset
12	LUMBOSACRAL SPINE	Nervous	Peripheral nerve injury	Perineal nerve injury	LS	24	39	LS.24.39	LP.23.00	956.5		S74.8	N81	Repetitive - Gradual Onset
12	LUMBOSACRAL SPINE	Bone	Injury without tissue type specified	Spinal stenosis	LS	31	0	LS.31.00	LP.31.55	724.8	ME93.43	M48.0	L84	Repetitive - Gradual Onset
12	LUMBOSACRAL SPINE	Bone	Fracture	Lumbar spine fracture	LS	31	13	LS.31.13	LP.31.13	724.8	NB52.0	S32.0	L76	Acute - Sudden Onset
12	LUMBOSACRAL SPINE	Bone	Bone stress injury	Pars stress fracture/ reaction	LS	31	18	LS.31.18	LP.31.18	724.8	FA72	S32.0	L76	Repetitive - Gradual Onset
12	LUMBOSACRAL SPINE	Bone	Injury without tissue type specified	Kissing spine	LS	31	33	LS.31.33	LP.31.53	724.8		M43.1	L84	Repetitive - Gradual Onset
12	LUMBOSACRAL SPINE	Bone	Fracture	Sacrum / coccyx fracture	LS	32	13	LS.32.13	LP.32.13	724.6	NB52.10	S32.2	L76	Acute - Sudden Onset
12	LUMBOSACRAL SPINE	Bone	Bone stress injury	Spondylolysis	LS	32	18	LS.32.18	LP.31.51	724.8	FA81	M47.9	L84	Repetitive - Gradual Onset
12	LUMBOSACRAL SPINE	Bone	Bone stress injury	coccydynia	LS	32	33	LS.32.33	LP.32.51	724.8		M53.3	L84	Repetitive - Gradual Onset
12	LUMBOSACRAL SPINE	Bone	Injury without tissue type specified	Spodylolisthesis	LS	33	18	LS.33.18	LP.31.52	724.8	FA84	M43.1	L84	Repetitive - Gradual Onset
12	LUMBOSACRAL SPINE	Cartilage / synovium / bursa	Synovitis / capsulitis	Lumbar facet syndrome	LS	41	30	LS.41.30	LP.41.51	724.8	ME84.2	M47.9	L84	Repetitive - Gradual Onset
12	LUMBOSACRAL SPINE	Cartilage / synovium / bursa	Arthritis	Lumbar facet osteoarthritis	LS	41	34	LS.41.34	LP.41.32	715.1	FA0	M47.9	L84	Repetitive - Gradual Onset
12	LUMBOSACRAL SPINE	Ligament / joint capsule	Injury without tissue type specified	Lumbar disc herniation	LS	42	33	LS.42.33	LP.42.52	722.1	FA81	M51.3	L86	Repetitive - Gradual Onset
12	LUMBOSACRAL SPINE	Ligament / joint capsule	Injury without tissue type specified	Lumbar degenerative disc disease	LS	42	42	LS.42.42	LP.42.51	722.5	FA80.8	M51.3	L86	Repetitive - Gradual Onset
12	LUMBOSACRAL SPINE	Cartilage / synovium / bursa	Synovitis / capsulitis	Sacroiliac asymmetry/dysfunction	LS	43	30	LS.43.30	LP.43.51	846.1		S33.6	L79	Repetitive - Gradual Onset
12	LUMBOSACRAL SPINE	Superficial tissues / skin	Laceration	Low back laceraton	LS	60	25	LS.60.25	LP.00.24	873		S31.0	S18	Acute - Sudden Onset
12	LUMBOSACRAL SPINE	Superficial tissues / skin	Abrasion	Low back abrasion	LS	60	26	LS.60.26	LP.00.25	916		S30.9	S17	Acute - Sudden Onset
12	LUMBOSACRAL SPINE	Non-specific	Injury without tissue type specified	Other Lumbar injury	LS	90	0	LS.90.00	LP.00.00	847.2		S33.5	L84	Acute - Sudden Onset
12	LUMBOSACRAL SPINE	Superficial tissues / skin	Contusion (superficial)	Low Back Contusion	LS	90	24	LS.90.24	LP.00.23	922.3	NB50.1	S30.0	S16	Acute - Sudden Onset
12	LUMBOSACRAL SPINE	Non-specific	Injury without tissue type specified	Non-specific low back pain / mechanical pain	LS	90	42	LS.90.42	LP.00.51	847.2		M54.9	L02	Repetitive - Gradual Onset
12	LUMBOSACRAL SPINE	Superficial tissues / skin	Stump injury	trans-pelvic disarticulation stump hematoma	LS	91	23	LS.91.23	NE85.6	955				Acute - Sudden Onset
12	LUMBOSACRAL SPINE	Superficial tissues / skin	Stump injury	trans-pelvic disarticulation stump contusion	LS	91	24	LS.91.24	NE85.6	955				Acute - Sudden Onset
12	LUMBOSACRAL SPINE	Superficial tissues / skin	Stump injury	trans-pelvic disarticulation stump laceration	LS	91	25	LS.91.25	NE85.6	955				Acute - Sudden Onset
12	LUMBOSACRAL SPINE	Superficial tissues / skin	Stump injury	trans-pelvic disarticulation stump maceration	LS	91	26	LS.91.26	NE85.6	955				Acute - Sudden Onset
12	LUMBOSACRAL SPINE	Cartilage / synovium / bursa	Stump injury	trans-pelvic disarticulation stump bursitis	LS	91	31	LS.91.31	NE85.6	955	FB50			Repetitive - Gradual Onset
12	LUMBOSACRAL SPINE	Nervous	Stump injury	trans-pelvic disarticulation stump neuroma	LS	91	41	LS.91.41	NE85.3	955				Repetitive - Gradual Onset
12	LUMBOSACRAL SPINE	Nervous	Stump injury	trans-pelvic disarticulation stump pain (including phantom pain)	LS	91	42	LS.91.42	NE85.6	955				Repetitive - Gradual Onset
13	HIP/GROIN	Muscle / tendon	Muscle Injury	Iliopsoas strain	HI	11	7	HI.11.07	HI.11.07	843.8	NC76.00	S76.0	L81	Acute - Sudden Onset
13	HIP/GROIN	Muscle / tendon	Muscle Injury	Gluteus maximius strain	HI	12	7	HI.12.07	HI.12.07	843.8	NC76.00	S76.3	L81	Acute - Sudden Onset
13	HIP/GROIN	Muscle / tendon	Muscle Injury	Gluteus maximius tear	HI	12	9	HI.12.09	HI.12.09	843.8	NC76.00	S76.3	L81	Acute - Sudden Onset
13	HIP/GROIN	Muscle / tendon	Muscle Injury	Gluteus medius strain	HI	13	7	HI.13.07	HI.13.07	843.8	NC76.00	S76.3	L81	Acute - Sudden Onset
13	HIP/GROIN	Muscle / tendon	Muscle Injury	Gluteus medius tear	HI	13	9	HI.13.09	HI.13.09	843.8	NC76.00	S76.3	L81	Acute - Sudden Onset
13	HIP/GROIN	Muscle / tendon	Muscle Injury	Lateral rotator strain	HI	14	7	HI.14.07	HI.14.07	843.8	NC76.00	S76.3	L81	Acute - Sudden Onset
13	HIP/GROIN	Muscle / tendon	Muscle Injury	Medial rotator strain	HI	15	7	HI.15.07	HI.15.07	843.8	NC76.00	S76.3	L81	Acute - Sudden Onset
13	HIP/GROIN	Muscle / tendon	Muscle Injury	Tensor Fasciea Latae strain	HI	16	7	HI.16.07	TH.15.07	843.8	NC76.00	S76.0	L81	Acute - Sudden Onset
13	HIP/GROIN	Muscle / tendon	Muscle Injury	Tensor fasciea latae spasm	HI	16	8	HI.16.08	TH.15.08	843.8	NC76.00	R25.2	L14	Acute - Sudden Onset
13	HIP/GROIN	Muscle / tendon	Muscle Injury	Tensor Fasciea Latae tear/rupture	HI	16	9	HI.16.09	TH.15.09	843.8	NC76.00	S76.0	L81	Acute - Sudden Onset
13	HIP/GROIN	Muscle / tendon	Muscle contusion	Tensor Fasciea Latae contusion	HI	16	24	HI.16.24	TH.15.23	843.8	NC76.00	S70.0	S16	Acute - Sudden Onset
13	HIP/GROIN	Muscle / tendon	Muscle Injury	Proximal adductor strain	HI	17	7	HI.17.07	TH.13.07	843.8	NC76.20	S76.2	L81	Acute - Sudden Onset
13	HIP/GROIN	Muscle / tendon	Muscle Injury	Proximal adductor spasm	HI	17	8	HI.17.08	TH.13.08	843.8	NC76.20	R25.2	L14	Acute - Sudden Onset
13	HIP/GROIN	Muscle / tendon	Muscle Injury	Proximal adductor tear/rupture	HI	17	9	HI.17.09	TH.13.09	843.8	NC76.20	S76.2	L81	Acute - Sudden Onset
13	HIP/GROIN	Muscle / tendon	Muscle contusion	Proximal adductor contusion	HI	17	24	HI.17.24	TH.13.23	843.8	NC76.20	S70.1	S16	Acute - Sudden Onset
13	HIP/GROIN	Muscle / tendon	Tendinopathy	Proximal adductor tendinopathy	HI	17	28	HI.17.28	TH.13.26	843.8	NC76.20	M76.8	L87	Repetitive - Gradual Onset
13	HIP/GROIN	Muscle / tendon	Muscle Injury	Sports Hernia	HI	18	7	HI.18.07	AB.13.00	553.9	NC76	K40.9	D91	Acute - Sudden Onset
13	HIP/GROIN	Nervous	Peripheral nerve injury	Ilioinguinal Nerve Entrapment	HI	20	39	HI.20.39	AB.20.51	956.5	NC74	S74.9	N81	Repetitive - Gradual Onset
13	HIP/GROIN	Nervous	Peripheral nerve injury	Hip neuroma	HI	20	41	HI.20.41	HI.20.44	956.5	NC74	G57.8	N94	Repetitive - Gradual Onset
13	HIP/GROIN	Nervous	Peripheral nerve injury	Piriformis Syndrome	HI	20	42	HI.20.42	HI.20.51	956.5	NC74	M54.3	L86	Repetitive - Gradual Onset
13	HIP/GROIN	Nervous	Peripheral nerve injury	Hip reflex sympathetic dystrophy	HI	20	43	HI.20.43	HI.20.41	956.5	NC74	M89.0	L99	Repetitive - Gradual Onset
13	HIP/GROIN	Nervous	Peripheral nerve injury	Meralgia paresthetica	HI	21	42	HI.21.42	HI.21.51	956.5	NC74	G57.1	N94	Repetitive - Gradual Onset
13	HIP/GROIN	Nervous	Peripheral nerve injury	Obturator nerve entrapment	HI	22	39	HI.22.39	HI.22.51	956.5	NC74	S74.8	N81	Repetitive - Gradual Onset
13	HIP/GROIN	Bone	Physis injury	ASIS apophysitis / avulsion	HI	32	20	HI.32.20	HI.32.20	732.6		S32.8	L76	Acute - Sudden Onset
13	HIP/GROIN	Bone	Fracture	Ilium fracture	HI	33	13	HI.33.13	LP.33.13	724.8		S32.3	L76	Acute - Sudden Onset
13	HIP/GROIN	Bone	Fracture	ASIS avulsion fracture	HI	33	14	HI.33.14	LP.33.14	724.8		S32.8	L76	Acute - Sudden Onset
13	HIP/GROIN	Bone	Physis injury	Ilium growth plate / physeal injury	HI	33	20	HI.33.20	LP.33.20	724.8		S32.8	L76	Acute - Sudden Onset
13	HIP/GROIN	Bone	Bone contusion	Hip Pointer (Iliac Crest Contusion)	HI	33	24	HI.33.24	LP.33.23	724.8		S70.0	S16	Acute - Sudden Onset
13	HIP/GROIN	Bone	Fracture	Femoral neck / head fracture	HI	34	13	HI.34.13	HI.34.13	820	NC72	S72.0	L75	Acute - Sudden Onset
13	HIP/GROIN	Bone	Bone stress injury	Femoral neck stress fracture	HI	34	18	HI.34.18	HI.34.18	820	NC72	S72.0	L75	Repetitive - Gradual Onset
13	HIP/GROIN	Bone	Physis injury	AIIS apophysitis / avulsion	HI	34	20	HI.34.20	HI.33.20	732.6		S32.8	L76	Acute - Sudden Onset
13	HIP/GROIN	Bone	Fracture	Pubic Fracture	HI	35	13	HI.35.13	LP.35.13	808.2	NB52.14	M70.7	L87	Acute - Sudden Onset
13	HIP/GROIN	Bone	Bone stress injury	Pubic stress fracture	HI	35	18	HI.35.18	LP.35.18	724.8		S32.8	L76	Repetitive - Gradual Onset
13	HIP/GROIN	Bone	Physis injury	Slipped capitus femorus	HI	35	20	HI.35.20	HI.35.20	732.2		M93.0	L94	Acute - Sudden Onset
13	HIP/GROIN	Bone	Bone stress injury	Osteitis Pubis	HI	35	32	HI.35.32	LP.35.51	724.8		S32.8	L76	Repetitive - Gradual Onset
13	HIP/GROIN	Bone	Avascular necrosis	Legg-Perthes	HI	35	35	HI.35.35	HI.35.34	732.1		M91.1	L94	Repetitive - Gradual Onset
13	HIP/GROIN	Bone	Fracture	Intertrochanteric fracture	HI	36	13	HI.36.13	HI.36.13	820.2	NC72.30	S72.1	L75	Acute - Sudden Onset
13	HIP/GROIN	Bone	Fracture	Acetabular fracture	HI	37	13	HI.37.13	HI.41.13	808	NB52.13	S32.4	L76	Acute - Sudden Onset
13	HIP/GROIN	Cartilage / synovium / bursa	Cartilage	Hip chondromalacia	HI	40	21	HI.40.21	HI.40.51	715.1		M94.2	L99	Repetitive - Gradual Onset
13	HIP/GROIN	Cartilage / synovium / bursa	Synovitis / capsulitis	Hip femoral acetabular impingement	HI	40	30	HI.40.30	HI.80.51	843.8		M25.8	L20	Repetitive - Gradual Onset
13	HIP/GROIN	Cartilage / synovium / bursa	Arthritis	Hip degenerative/osteoarthritis	HI	40	34	HI.40.34	HI.40.32	715.1	FA00.0	M16.9	L89	Repetitive - Gradual Onset
13	HIP/GROIN	Cartilage / synovium / bursa	Bursitis	Greater trochanteric bursitis / snapping hip syndrome	HI	41	31	HI.41.31	HI.61.29	843.8	FB50	M70.6	L87	Repetitive - Gradual Onset
13	HIP/GROIN	Cartilage / synovium / bursa	Bursitis	Iliopsoas bursitis	HI	42	31	HI.42.31	HI.62.29	843.8	FB50	M70.7	L87	Repetitive - Gradual Onset
13	HIP/GROIN	Cartilage / synovium / bursa	Synovitis / capsulitis	Hip capsulitis	HI	43	30	HI.43.30	HI.42.31	843.9		M77.9	L87	Repetitive - Gradual Onset
13	HIP/GROIN	Cartilage / synovium / bursa	Synovitis / capsulitis	Hip loose body	HI	44	30	HI.44.30	HI.43.51	843.9		M24.0	L99	Repetitive - Gradual Onset
13	HIP/GROIN	Cartilage / synovium / bursa	Cartilage	Hip labral tear	HI	45	21	HI.45.21	HI.45.09	843.9		M24.1	L99	Acute - Sudden Onset
13	HIP/GROIN	Ligament / joint capsule	Injury without tissue type specified	Symphysis Pubis Diastasis	HI	54	9	HI.54.09	LP.44.51	848.8		S33.4	L81	Acute - Sudden Onset
13	HIP/GROIN	Superficial tissues / skin	Contusion (superficial)	Hip Contusion	HI	60	24	HI.60.24	HI.00.23	924	NB90.6	S70.0	S16	Acute - Sudden Onset
13	HIP/GROIN	Superficial tissues / skin	Laceration	Hip laceration	HI	60	25	HI.60.25	HI.00.24	873	NC70.0	S71.0	S18	Acute - Sudden Onset
13	HIP/GROIN	Superficial tissues / skin	Abrasion	Hip abrasion	HI	60	26	HI.60.26	HI.00.25	916	NC70.0	S70.8	S17	Acute - Sudden Onset
13	HIP/GROIN	Vessels	Vascular trauma	Hip arterial injury / disorder	HI	71	45	HI.71.45	HI.71.00	843.8	NC75	S75.8	A80	Repetitive - Gradual Onset
13	HIP/GROIN	Vessels	Vascular trauma	Hip venous injury / disorder	HI	72	45	HI.72.45	HI.72.00	843.8	NC75	S75.8	A80	Repetitive - Gradual Onset
13	HIP/GROIN	Non-specific	Injury without tissue type specified	Hernia - Inguinal and Femoral	HI	80	0	HI.80.00	AB.80.00	843.8		K40.9	D91	Acute - Sudden Onset
13	HIP/GROIN	Internal Organs	Organ Trauma	Testicular Contusion	HI	80	46	HI.80.46	HI.01.23	922.4	NB93.00	S30.2	L81	Acute - Sudden Onset
13	HIP/GROIN	Non-specific	Injury without tissue type specified	Other hip injury	HI	90	0	HI.90.00	HI.00.00	959.6		S79.9	L81	Acute - Sudden Onset
13	HIP/GROIN	Superficial tissues / skin	Stump injury	hip disarticulation stump hematoma	HI	91	23	HI.91.23	NE85.6	955				Acute - Sudden Onset
13	HIP/GROIN	Superficial tissues / skin	Stump injury	hip disarticulation stump contusion	HI	91	24	HI.91.24	NE85.6	955				Acute - Sudden Onset
13	HIP/GROIN	Superficial tissues / skin	Stump injury	hip disarticulation stump laceration	HI	91	25	HI.91.25	NE85.6	955				Acute - Sudden Onset
13	HIP/GROIN	Superficial tissues / skin	Stump injury	hip disarticulation stump maceration	HI	91	26	HI.91.26	NE85.6	955				Acute - Sudden Onset
13	HIP/GROIN	Cartilage / synovium / bursa	Stump injury	hip disarticulation stump bursitis	HI	91	31	HI.91.31	NE85.6	955	FB50			Repetitive - Gradual Onset
13	HIP/GROIN	Nervous	Stump injury	hip disarticulation stump neuroma	HI	91	41	HI.91.41	NE85.3	955				Repetitive - Gradual Onset
13	HIP/GROIN	Nervous	Stump injury	hip disarticulation stump pain (including phantom pain)	HI	91	42	HI.91.42	NE85.6	955				Repetitive - Gradual Onset
14	THIGH	Muscle / tendon	Muscle compartment syndrome	Thigh acute compartment syndrome	TH	10	36	TH.10.36	TH.80.51	730	NC76.1	M62.2	L99	Acute - Sudden Onset
14	THIGH	Muscle / tendon	Muscle Injury	Quadraceps strain	TH	11	7	TH.11.07	TH.11.07	843.8	NC76.10	S76.1	L81	Acute - Sudden Onset
14	THIGH	Muscle / tendon	Muscle Injury	Quadraceps spasm	TH	11	8	TH.11.08	TH.11.08	843.8	NC76.1	R25.2	L14	Acute - Sudden Onset
14	THIGH	Muscle / tendon	Muscle Injury	Quadraceps tear/rupture	TH	11	9	TH.11.09	TH.11.09	843.8	NC76.10	S76.1	L81	Acute - Sudden Onset
14	THIGH	Muscle / tendon	Muscle contusion	Quadraceps contusion	TH	11	24	TH.11.24	TH.11.23	843.8	NC70.3	S70.1	S16	Acute - Sudden Onset
14	THIGH	Muscle / tendon	Muscle Injury	Quadraceps myositis ossificans	TH	11	33	TH.11.33	TH.11.51	843.8	NC76.1	M61.0	L99	Repetitive - Gradual Onset
14	THIGH	Muscle / tendon	Muscle compartment syndrome	Thigh exertional compartment syndrome	TH	11	36	TH.11.36	TH.80.36	730	NC76.1	M62.2	L99	Repetitive - Gradual Onset
14	THIGH	Muscle / tendon	Muscle Injury	Hamstring strain	TH	12	7	TH.12.07	TH.12.07	843.8	NC76.30	S76.3	L81	Acute - Sudden Onset
14	THIGH	Muscle / tendon	Muscle Injury	Hamstring spasm	TH	12	8	TH.12.08	TH.12.08	843.8	NC76.3	R25.2	L14	Acute - Sudden Onset
14	THIGH	Muscle / tendon	Muscle Injury	Hamstring tear/rupture	TH	12	9	TH.12.09	TH.12.09	843.8	NC76.30	S76.3	L81	Acute - Sudden Onset
14	THIGH	Muscle / tendon	Muscle contusion	Hamstring contusion	TH	12	24	TH.12.24	TH.12.23	843.8	NC76.30	S70.1	S16	Acute - Sudden Onset
14	THIGH	Muscle / tendon	Muscle Injury	Hamstring myositis ossificans	TH	12	33	TH.12.33	TH.12.51	843.8	NC76.3	M61.0	L99	Repetitive - Gradual Onset
14	THIGH	Muscle / tendon	Muscle Injury	Adductor muscle strain	TH	13	7	TH.13.07	TH.13.07	843.8	NC76.20	S76.2	L81	Acute - Sudden Onset
14	THIGH	Muscle / tendon	Muscle Injury	Adductor muscle spasm	TH	13	8	TH.13.08	TH.13.08	843.8	NC76.20	R25.2	L14	Acute - Sudden Onset
14	THIGH	Muscle / tendon	Muscle Injury	Adductor muscle tear/rupture	TH	13	9	TH.13.09	TH.13.09	843.8	NC76.20	S76.2	L81	Acute - Sudden Onset
14	THIGH	Muscle / tendon	Muscle contusion	Adductor muscle contusion	TH	13	24	TH.13.24	TH.13.23	843.8	NC76.20	S70.1	S16	Acute - Sudden Onset
14	THIGH	Muscle / tendon	Tendinopathy	Adductor tendinopathy	TH	13	28	TH.13.28	TH.13.26	843.8	NC76.20	M76.8	L87	Repetitive - Gradual Onset
14	THIGH	Muscle / tendon	Muscle Injury	Adductor myositis ossificans	TH	13	33	TH.13.33	TH.13.51	843.8	NC76.20	M61.0	L99	Repetitive - Gradual Onset
14	THIGH	Muscle / tendon	Muscle Injury	Sartorius strain	TH	14	7	TH.14.07	TH.14.07	843.8	NC76.Y	S76.0	L81	Acute - Sudden Onset
14	THIGH	Bone	Fracture	Femoral fracture	TH	32	13	TH.32.13	TH.32.13	821	NC72	S72.3	L75	Acute - Sudden Onset
14	THIGH	Bone	Fracture	Femoral avulsion fracture	TH	32	14	TH.32.14	TH.32.14	821	NC72	S72.3	L75	Acute - Sudden Onset
14	THIGH	Bone	Fracture	Femoral fracture -non-union	TH	32	15	TH.32.15	TH.32.15	821	FB80.8	S72.3	L75	Acute - Sudden Onset
14	THIGH	Bone	Bone stress injury	Femoral stress fracture	TH	32	18	TH.32.18	TH.32.18	821	NC72	S72.3	L75	Repetitive - Gradual Onset
14	THIGH	Bone	Fracture	Femoral greenstick fracture	TH	32	19	TH.32.19	TH.32.19	821	NC72	S72.3	L75	Acute - Sudden Onset
14	THIGH	Bone	Physis injury	Femoral growth plate / physeal injury	TH	32	20	TH.32.20	TH.32.20	821	NC72	S72.8	L75	Acute - Sudden Onset
14	THIGH	Bone	Bone stress injury	Femoral periostitis	TH	32	32	TH.32.32	TH.32.30	730.3	NC72	M86.9	L70	Repetitive - Gradual Onset
14	THIGH	Bone	Injury without tissue type specified	Femoral exostosis	TH	33	32	TH.33.32	TH.32.37	821	NC72	D16.9	L97	Repetitive - Gradual Onset
14	THIGH	Bone	Fracture	Ischium fracture	TH	34	13	TH.34.13	LP.34.13	724.8		S32.8	L76	Acute - Sudden Onset
14	THIGH	Bone	Fracture	Ischium avulsion fracture	TH	34	14	TH.34.14	LP.34.14	724.8		S32.8	L76	Acute - Sudden Onset
14	THIGH	Bone	Physis injury	Ischium growth plate / physeal injury	TH	34	20	TH.34.20	LP.34.20	724.8	ME80	S32.8	L76	Acute - Sudden Onset
14	THIGH	Cartilage / synovium / bursa	Cartilage	Femoral osteochondral fracture	TH	42	17	TH.42.17	TH.32.17	821	NC93.4	S72.3	L75	Acute - Sudden Onset
14	THIGH	Cartilage / synovium / bursa	Bursitis	Ischial bursitis	TH	44	31	TH.44.31	LP.34.29	727.3	FB50	M70.7	L87	Repetitive - Gradual Onset
14	THIGH	Superficial tissues / skin	Laceration	Thigh laceration	TH	60	25	TH.60.25	TH.00.24	873	NC70.2	S71.1	S18	Acute - Sudden Onset
14	THIGH	Superficial tissues / skin	Abrasion	Thigh abrasion	TH	60	26	TH.60.26	TH.00.25	916	NC70.2	S70.8	S17	Acute - Sudden Onset
14	THIGH	Non-specific	Injury without tissue type specified	Other thigh injury	TH	90	0	TH.90.00	TH.00.00	843.9		S79.9	L81	Acute - Sudden Onset
14	THIGH	Superficial tissues / skin	Stump injury	trans-femoral amputation stump hematoma	TH	91	23	TH.91.23	NE85.6	955				Acute - Sudden Onset
14	THIGH	Superficial tissues / skin	Stump injury	trans-femoral amputation stump contusion	TH	91	24	TH.91.24	NE85.6	955				Acute - Sudden Onset
14	THIGH	Superficial tissues / skin	Stump injury	trans-femoral amputation stump laceration	TH	91	25	TH.91.25	NE85.6	955				Acute - Sudden Onset
14	THIGH	Superficial tissues / skin	Stump injury	trans-femoral amputation stump maceration	TH	91	26	TH.91.26	NE85.6	955				Acute - Sudden Onset
14	THIGH	Cartilage / synovium / bursa	Stump injury	trans-femoral amputation stump bursitis	TH	91	31	TH.91.31	NE85.6	955	FB50			Repetitive - Gradual Onset
14	THIGH	Nervous	Stump injury	trans-femoral amputation stump neuroma	TH	91	41	TH.91.41	NE85.3	955				Repetitive - Gradual Onset
14	THIGH	Nervous	Stump injury	trans-femoral amputation stump pain (including phantom pain)	TH	91	42	TH.91.42	NE85.6	955				Repetitive - Gradual Onset
15	KNEE	Muscle / tendon	Tendinopathy	Biceps Femoris tendinopathy	KN	11	28	KN.11.28	KN.11.26	844.8	NC76.3	M76.9	L87	Repetitive - Gradual Onset
15	KNEE	Muscle / tendon	Tendinopathy	Pes anserine tendinopathy	KN	12	28	KN.12.28	KN.12.26	844.8	NC96	M76.9	L87	Repetitive - Gradual Onset
15	KNEE	Muscle / tendon	Tendinopathy	Iliotibial band friction syndrome	KN	13	28	KN.13.28	KN.13.31	844.8	NC76	M76.3	L87	Repetitive - Gradual Onset
15	KNEE	Muscle / tendon	Tendon Rupture	Patellar tendon tear/rupture	KN	14	9	KN.14.09	KN.14.09	844.8	NC96	S76.1	L81	Acute - Sudden Onset
15	KNEE	Muscle / tendon	Tendinopathy	Patellar tendinopathy	KN	14	28	KN.14.28	KN.14.26	844.8	NC96	M76.5	L87	Repetitive - Gradual Onset
15	KNEE	Muscle / tendon	Tendinopathy	Patellar tendon cystic degeneration	KN	14	33	KN.14.33	KN.14.51	844.8	NC96	M76.5	L87	Repetitive - Gradual Onset
15	KNEE	Muscle / tendon	Tendon Rupture	Quadriceps tendon tear/rupture	KN	15	9	KN.15.09	KN.15.09	844.8	NC76.10	S76.1	L81	Acute - Sudden Onset
15	KNEE	Muscle / tendon	Tendinopathy	Quadriceps tendinopathy	KN	15	28	KN.15.28	KN.15.26	844.8	NC76.10	M76.5	L87	Repetitive - Gradual Onset
15	KNEE	Muscle / tendon	Tendinopathy	Popliteus tendinopathy	KN	16	28	KN.16.28	KN.16.26	844.8	NC96	M76.8	L87	Repetitive - Gradual Onset
15	KNEE	Nervous	Peripheral nerve injury	Knee reflex sympathetic dystrophy	KN	20	43	KN.20.43	KN.20.41	956.5	NC94	M89.0	L99	Repetitive - Gradual Onset
15	KNEE	Nervous	Peripheral nerve injury	Saphenous neuroma	KN	21	41	KN.21.41	KN.21.44	956.5	NC94	G57.8	N94	Repetitive - Gradual Onset
15	KNEE	Bone	Fracture	Intrarticular fracture of femur	KN	32	13	KN.32.13	KN.32.13	821.2	NC72.6	S72.8	L75	Acute - Sudden Onset
15	KNEE	Bone	Fracture	Tibial plateau fracture	KN	33	13	KN.33.13	KN.33.13	823	NC92.1	S82.1	L73	Acute - Sudden Onset
15	KNEE	Bone	Fracture	Tibial spine avulsion	KN	33	14	KN.33.14	KN.33.14	823	NC92.1	S82.1	L73	Acute - Sudden Onset
15	KNEE	Bone	Physis injury	Osgood-Schlatter's Disease	KN	33	20	KN.33.20	KN.33.20	823	NC92	M92.5	L94	Acute - Sudden Onset
15	KNEE	Bone	Avascular necrosis	Femoral osteonecrosis	KN	33	35	KN.33.35	KN.43.53	732.4	NC72.6	M87.8	L99	Repetitive - Gradual Onset
15	KNEE	Bone	Fracture	Fibular head fracture	KN	34	13	KN.34.13	KN.34.13	823	NC92.4	S82.4	L73	Acute - Sudden Onset
15	KNEE	Bone	Fracture	Patellar fracture	KN	35	13	KN.35.13	KN.35.13	822	NC92.0	S82.0	L76	Acute - Sudden Onset
15	KNEE	Bone	Fracture	Patellar avulsion fracture	KN	35	14	KN.35.14	KN.35.14	822	NC92.0	S82.0	L76	Acute - Sudden Onset
15	KNEE	Bone	Physis injury	Sinding-Larson-Johanson Syndrome	KN	35	20	KN.35.20	KN.35.20	732.8	NC92.0	M92.4	L94	Acute - Sudden Onset
15	KNEE	Bone	Injury without tissue type specified	Bipartite or multipartite patella	KN	35	42	KN.35.42	KN.35.51	844.8	NC92.0	Q74.1	L82	Repetitive - Gradual Onset
15	KNEE	Bone	Injury without tissue type specified	Patella alta	KN	36	42	KN.36.42	KN.35.52	844.8	NC92.0	M22.3	L99	Repetitive - Gradual Onset
15	KNEE	Bone	Injury without tissue type specified	Patella infera	KN	37	42	KN.37.42	KN.35.53	844.8	NC92.0	M22.3	L99	Repetitive - Gradual Onset
15	KNEE	Cartilage / synovium / bursa	Cartilage	Loose body of knee	KN	40	21	KN.40.21	KN.66.51	844.8	NC93.3Y	M23.4	L99	Repetitive - Gradual Onset
15	KNEE	Cartilage / synovium / bursa	Synovitis / capsulitis	Knee synovitis	KN	40	30	KN.40.30	KN.41.28	844.8	NC96.Y	M65.9	L87	Repetitive - Gradual Onset
15	KNEE	Cartilage / synovium / bursa	Arthritis	Knee generalized osteoarthritis	KN	40	34	KN.40.34	KN.41.32	844.8	FA01.0	M17.1	L90	Repetitive - Gradual Onset
15	KNEE	Cartilage / synovium / bursa	Synovitis / capsulitis	Baker's Cyst	KN	41	23	KN.41.23	KN.41.51	844.8	NC96.5	M71.2	L87	Repetitive - Gradual Onset
15	KNEE	Cartilage / synovium / bursa	Synovitis / capsulitis	Arthrofibrosis	KN	41	30	KN.41.30	KN.41.43	844.8	NC96.Y	M25.8	L20	Repetitive - Gradual Onset
15	KNEE	Cartilage / synovium / bursa	Bursitis	Knee bursitis - prepatellar, infrapatellar, pes anserine	KN	41	31	KN.41.31	KN.63.29	844.8	FB50	M70.4	L87	Repetitive - Gradual Onset
15	KNEE	Cartilage / synovium / bursa	Cartilage	Patellofemoral chondromalacia	KN	42	21	KN.42.21	KN.42.54	717.7		M22.4	L99	Repetitive - Gradual Onset
15	KNEE	Cartilage / synovium / bursa	Cartilage	Post-traumatic patellofemoral pain	KN	42	33	KN.42.33	KN.42.53	715.1		M22.2	L99	Repetitive - Gradual Onset
15	KNEE	Cartilage / synovium / bursa	Arthritis	Patellofemoral osteoarthritis	KN	42	34	KN.42.34	KN.42.32	715.1	FA0	M17.9	L99	Repetitive - Gradual Onset
15	KNEE	Cartilage / synovium / bursa	Cartilage	Patellofemoral osteochondritis dissecans (OCD)	KN	42	37	KN.42.37	KN.42.40	715.1		M22.2	L99	Repetitive - Gradual Onset
15	KNEE	Cartilage / synovium / bursa	Cartilage	Lateral hyperpressure syndrome	KN	42	38	KN.42.38	KN.42.52	715.1		M22.3	L99	Repetitive - Gradual Onset
15	KNEE	Cartilage / synovium / bursa	Cartilage	Patellofemoral pain syndrome	KN	42	42	KN.42.42	KN.42.51	715.1		M22.4	L99	Repetitive - Gradual Onset
15	KNEE	Cartilage / synovium / bursa	Arthritis	Unicompartmental osteoarthritis	KN	43	34	KN.43.34	KN.43.32	715.1	FA0	M17.1	L90	Repetitive - Gradual Onset
15	KNEE	Cartilage / synovium / bursa	Cartilage	Femoral osteochondritis dissecans (OCD)	KN	43	37	KN.43.37	KN.43.40	732.4		M93.2	L94	Repetitive - Gradual Onset
15	KNEE	Cartilage / synovium / bursa	Arthritis	Proximal tibio-fibular degenerative arthritis	KN	44	34	KN.44.34	KN.44.32	715.1	FA01	M19.8	L91	Repetitive - Gradual Onset
15	KNEE	Cartilage / synovium / bursa	Cartilage	Patellar osteochondral fracture	KN	45	17	KN.45.17	KN.35.17	822		S82.0	L76	Acute - Sudden Onset
15	KNEE	Cartilage / synovium / bursa	Cartilage	Medial meniscal tear	KN	45	21	KN.45.21	KN.45.09	717.3	NC93.30	S83.2	L96	Acute - Sudden Onset
15	KNEE	Cartilage / synovium / bursa	Cartilage	Lateral meniscal tear	KN	46	21	KN.46.21	KN.46.09	717.4	NC93.31	S83.2	L96	Acute - Sudden Onset
15	KNEE	Cartilage / synovium / bursa	Synovitis / capsulitis	Fat pad syndrome / plica	KN	47	30	KN.47.30	KN.41.53	844.8	NC96.Y	M79.4	L99	Repetitive - Gradual Onset
15	KNEE	Ligament / joint capsule	Injury without tissue type specified	Pelligrini-Steida Syndrome	KN	50	33	KN.50.33	KN.51.51	844.1		M76.4	L87	Repetitive - Gradual Onset
15	KNEE	Ligament / joint capsule	Joint Sprain	Medial collateral ligament 1° sprain- acute	KN	51	1	KN.51.01	KN.51.01	844.1	NC93.50	S83.4	L78	Acute - Sudden Onset
15	KNEE	Ligament / joint capsule	Joint Sprain	Medial collateral ligament 2° sprain- acute	KN	51	2	KN.51.02	KN.51.02	844.1	NC93.50	S83.4	L78	Acute - Sudden Onset
15	KNEE	Ligament / joint capsule	Joint Sprain	Medial collateral ligament 3° sprain- acute	KN	51	3	KN.51.03	KN.51.03	844.1	NC93.50	S83.4	L78	Acute - Sudden Onset
15	KNEE	Ligament / joint capsule	Joint Sprain	Medial collateral ligament 1° sprain- chronic	KN	51	4	KN.51.04	KN.51.04	844.1	NC93.50	S83.4	L78	Repetitive - Gradual Onset
15	KNEE	Ligament / joint capsule	Joint Sprain	Medial collateral ligament 2° sprain- chronic	KN	51	5	KN.51.05	KN.51.05	844.1	NC93.50	S83.4	L78	Repetitive - Gradual Onset
15	KNEE	Ligament / joint capsule	Joint Sprain	Medial collateral ligament 3° sprain- chronic	KN	51	6	KN.51.06	KN.51.06	844.1	NC93.50	S83.4	L78	Repetitive - Gradual Onset
15	KNEE	Ligament / joint capsule	Joint Sprain	Lateral collateral ligament 1° sprain- acute	KN	52	1	KN.52.01	KN.52.01	844	NC93.53	S83.4	L78	Acute - Sudden Onset
15	KNEE	Ligament / joint capsule	Joint Sprain	Lateral collateral ligament 2° sprain- acute	KN	52	2	KN.52.02	KN.52.02	844	NC93.53	S83.4	L78	Acute - Sudden Onset
15	KNEE	Ligament / joint capsule	Joint Sprain	Lateral collateral ligament 3° sprain- acute	KN	52	3	KN.52.03	KN.52.03	844	NC93.53	S83.4	L78	Acute - Sudden Onset
15	KNEE	Ligament / joint capsule	Joint Sprain	Lateral collateral ligament 1° sprain- chronic	KN	52	4	KN.52.04	KN.52.04	844	NC93.53	S83.4	L78	Repetitive - Gradual Onset
15	KNEE	Ligament / joint capsule	Joint Sprain	Lateral collateral ligament 2° sprain- chronic	KN	52	5	KN.52.05	KN.52.05	844	NC93.53	S83.4	L78	Repetitive - Gradual Onset
15	KNEE	Ligament / joint capsule	Joint Sprain	Lateral collateral ligament 3° sprain- chronic	KN	52	6	KN.52.06	KN.52.06	844	NC93.53	S83.4	L78	Repetitive - Gradual Onset
15	KNEE	Ligament / joint capsule	Joint Sprain	Anterior cruciate ligament partial tear- acute	KN	53	2	KN.53.02	KN.53.02	844.2	NC93.60	S83.5	L96	Acute - Sudden Onset
15	KNEE	Ligament / joint capsule	Joint Sprain	Anterior cruciate ligament complete tear- acute	KN	53	3	KN.53.03	KN.53.03	844.2	NC93.62	S83.5	L96	Acute - Sudden Onset
15	KNEE	Ligament / joint capsule	Joint Sprain	Anterior cruciate ligament partial tear- chronic	KN	53	5	KN.53.05	KN.53.05	844.2	NC93.60	S83.5	L96	Repetitive - Gradual Onset
15	KNEE	Ligament / joint capsule	Joint Sprain	Anterior cruciate ligament complete tear- chronic	KN	53	6	KN.53.06	KN.53.06	844.2	NC93.62	S83.5	L96	Repetitive - Gradual Onset
15	KNEE	Ligament / joint capsule	Joint Sprain	Anterior cruciate ligament graft rupture	KN	53	9	KN.53.09	KN.53.09	844.2	NC93.62	S83.5	L96	Acute - Sudden Onset
15	KNEE	Ligament / joint capsule	Joint Sprain	Posterior cruciate ligament partial tear- acute	KN	54	2	KN.54.02	KN.54.02	844.2	NC93.61	S83.5	L96	Acute - Sudden Onset
15	KNEE	Ligament / joint capsule	Joint Sprain	Posterior cruciate ligament complete tear- acute	KN	54	3	KN.54.03	KN.54.03	844.2	NC93.63	S83.5	L96	Acute - Sudden Onset
15	KNEE	Ligament / joint capsule	Joint Sprain	Posterior cruciate ligament partial tear- chronic	KN	54	5	KN.54.05	KN.54.05	844.2	NC93.61	S83.5	L96	Repetitive - Gradual Onset
15	KNEE	Ligament / joint capsule	Joint Sprain	Posterior cruciate ligament complete tear- chronic	KN	54	6	KN.54.06	KN.54.06	844.2	NC93.63	S83.5	L96	Repetitive - Gradual Onset
15	KNEE	Ligament / joint capsule	Joint Sprain	Patellofemoral dislocation	KN	55	10	KN.55.10	KN.42.10	836.3	NC93.1	S83.0	L80	Acute - Sudden Onset
15	KNEE	Ligament / joint capsule	Joint Sprain	Patellofemoral subluxation	KN	55	11	KN.55.11	KN.42.11	836.3	NC93.1	S83.0	L80	Acute - Sudden Onset
15	KNEE	Ligament / joint capsule	Chronic Instability	Patellofemoral functional instability	KN	55	12	KN.55.12	KN.42.12	836.3	FA32.0	M22.2	L99	Repetitive - Gradual Onset
15	KNEE	Ligament / joint capsule	Joint Sprain	Tibial-femoral dislocation	KN	56	10	KN.56.10	KN.43.10	836.5	NC93.2	S83.1	L80	Acute - Sudden Onset
15	KNEE	Ligament / joint capsule	Chronic Instability	Tibial-femoral Functional Instability	KN	56	12	KN.56.12	KN.43.12	836.5	FA33.4	M25.3	L99	Repetitive - Gradual Onset
15	KNEE	Ligament / joint capsule	Joint Sprain	Proximal tibio-fibular dislocation	KN	57	10	KN.57.10	KN.44.10	836.5		S83.1	L80	Acute - Sudden Onset
15	KNEE	Ligament / joint capsule	Joint Sprain	Proximal tibio-fibular subluxation	KN	57	11	KN.57.11	KN.44.11	836.5		S83.1	L80	Acute - Sudden Onset
15	KNEE	Superficial tissues / skin	Contusion (superficial)	Knee contusion	KN	60	24	KN.60.24	KN.00.23	924.1	NC90.1	S80.0	S16	Acute - Sudden Onset
15	KNEE	Superficial tissues / skin	Laceration	Knee laceration	KN	60	25	KN.60.25	KN.00.24	873	NC90.0	S81.0	S18	Acute - Sudden Onset
15	KNEE	Superficial tissues / skin	Abrasion	Knee abrasion	KN	60	26	KN.60.26	KN.00.25	916	NC90.0	S80.9	S17	Acute - Sudden Onset
15	KNEE	Non-specific	Injury without tissue type specified	Other knee injury	KN	90	0	KN.90.00	KN.00.00	844.9		S83.6	L78	Acute - Sudden Onset
15	KNEE	Superficial tissues / skin	Stump injury	knee disarticulation stump hematoma	KN	91	23	KN.91.23	NE85.6	955				Acute - Sudden Onset
15	KNEE	Superficial tissues / skin	Stump injury	knee disarticulation stump contusion	KN	91	24	KN.91.24	NE85.6	955				Acute - Sudden Onset
15	KNEE	Superficial tissues / skin	Stump injury	knee disarticulation stump laceration	KN	91	25	KN.91.25	NE85.6	955				Acute - Sudden Onset
15	KNEE	Superficial tissues / skin	Stump injury	knee disarticulation stump maceration	KN	91	26	KN.91.26	NE85.6	955				Acute - Sudden Onset
15	KNEE	Cartilage / synovium / bursa	Stump injury	knee disarticulation stump bursitis	KN	91	31	KN.91.31	NE85.6	955	FB50			Repetitive - Gradual Onset
15	KNEE	Nervous	Stump injury	knee disarticulation stump neuroma	KN	91	41	KN.91.41	NE85.3	955				Repetitive - Gradual Onset
15	KNEE	Nervous	Stump injury	knee disarticulation stump pain (including phantom pain)	KN	91	42	KN.91.42	NE85.6	955				Repetitive - Gradual Onset
16	LOWER LEG	Muscle / tendon	Muscle Injury	Other leg muscle strain	LE	10	7	LE.10.07	LE.10.07	844.8	NC96	S86.9	L81	Acute - Sudden Onset
16	LOWER LEG	Muscle / tendon	Muscle compartment syndrome	Anterior exertional compartment syndrome	LE	10	36	LE.10.36	LE.81.36	844.8	NC96.20	M62.2	L99	Repetitive - Gradual Onset
16	LOWER LEG	Muscle / tendon	Muscle Injury	Gastrocnemius strain	LE	11	7	LE.11.07	LE.11.07	844.8	NC96.10	S86.1	L81	Acute - Sudden Onset
16	LOWER LEG	Muscle / tendon	Muscle Injury	Gastrocnemius spasm	LE	11	8	LE.11.08	LE.11.08	844.8	NC96.10	R25.2	L14	Acute - Sudden Onset
16	LOWER LEG	Muscle / tendon	Muscle Injury	Gastrocemius Tear/Rupture	LE	11	9	LE.11.09	LE.11.09	844.8	NC96.10	S86.1	L81	Acute - Sudden Onset
16	LOWER LEG	Muscle / tendon	Muscle Injury	Gastrocnemius cyst	LE	11	22	LE.11.22	LE.11.51	844.8	NC96.10	M62.8	L99	Repetitive - Gradual Onset
16	LOWER LEG	Muscle / tendon	Muscle compartment syndrome	Lateral exertional compartment syndrome	LE	11	36	LE.11.36	LE.82.36	844.8	NC96.10	M62.2	L99	Repetitive - Gradual Onset
16	LOWER LEG	Muscle / tendon	Muscle Injury	Soleus strain	LE	12	7	LE.12.07	LE.12.07	844.8	NC96.10	S86.1	L81	Acute - Sudden Onset
16	LOWER LEG	Muscle / tendon	Muscle Injury	Soleus spasm	LE	12	8	LE.12.08	LE.12.08	844.8	NC96.10	R25.2	L14	Acute - Sudden Onset
16	LOWER LEG	Muscle / tendon	Muscle compartment syndrome	Acute compartment syndrome	LE	12	36	LE.12.36	LE.84.51	844.8	NC96.10	T79.6	L99	Repetitive - Gradual Onset
16	LOWER LEG	Muscle / tendon	Muscle Injury	Tibialis posterior strain	LE	13	7	LE.13.07	LE.13.07	844.8	NC96.10	S86.1	L81	Acute - Sudden Onset
16	LOWER LEG	Muscle / tendon	Muscle compartment syndrome	Deep posterior exertional compartment syndrome	LE	13	36	LE.13.36	LE.84.36	844.8	NC96.10	M62.2	L99	Repetitive - Gradual Onset
16	LOWER LEG	Muscle / tendon	Muscle Injury	Tibialis anterior strain	LE	14	7	LE.14.07	LE.14.07	844.8	NC96.20	S86.2	L81	Acute - Sudden Onset
16	LOWER LEG	Muscle / tendon	Muscle Injury	Tibialis anterior tendon rupture	LE	14	9	LE.14.09	LE.14.09	844.8	NC96.20	S86.1	L81	Acute - Sudden Onset
16	LOWER LEG	Muscle / tendon	Muscle Injury	Peroneus strain	LE	15	7	LE.15.07	LE.15.07	844.8	NC96.20	S86.3	L81	Acute - Sudden Onset
16	LOWER LEG	Muscle / tendon	Tendon Rupture	Achilles tendon rupture	LE	16	9	LE.16.09	LE.16.09	844.8	NC96.02	S86.0	L81	Acute - Sudden Onset
16	LOWER LEG	Muscle / tendon	Tendinopathy	Achilles tendinopathy	LE	16	28	LE.16.28	LE.16.26	844.8	NC96.0	M76.6	L87	Repetitive - Gradual Onset
16	LOWER LEG	Muscle / tendon	Tendinopathy	Achilles tenosynovitis	LE	16	29	LE.16.29	LE.16.27	844.8	FB40	M65.8	L87	Repetitive - Gradual Onset
16	LOWER LEG	Muscle / tendon	Tendinopathy	Achilles tendon cystic degeneration	LE	16	33	LE.16.33	LE.16.51	844.8	NC96.0	M76.8	L87	Repetitive - Gradual Onset
16	LOWER LEG	Muscle / tendon	Muscle compartment syndrome	Superficial posterior exertional compartment syndrome	LE	17	36	LE.17.36	LE.83.36	844.8	NC96.10	M62.2	L99	Repetitive - Gradual Onset
16	LOWER LEG	Nervous	Peripheral nerve injury	Leg reflex sympathetic dystrophy	LE	20	43	LE.20.43	LE.20.41	956.3	NC94	M89.0	L99	Repetitive - Gradual Onset
16	LOWER LEG	Nervous	Peripheral nerve injury	Common peroneal nerve injury	LE	21	39	LE.21.39	LE.21.51	956.3	NC94	G57.3	N94	Repetitive - Gradual Onset
16	LOWER LEG	Nervous	Peripheral nerve injury	Superficial peroneal nerve injury/Entrapment	LE	22	39	LE.22.39	LE.22.51	956.3	NC94	G57.3	N94	Repetitive - Gradual Onset
16	LOWER LEG	Nervous	Peripheral nerve injury	Deep peroneal nerve injury	LE	23	39	LE.23.39	LE.23.51	956.3	NC94	G57.3	N94	Repetitive - Gradual Onset
16	LOWER LEG	Nervous	Peripheral nerve injury	Sural nerve entrapment	LE	24	39	LE.24.39	LE.24.51	956.3	NC94	G57.8	N94	Repetitive - Gradual Onset
16	LOWER LEG	Bone	Fracture	Tibial fracture	LE	32	13	LE.32.13	LE.32.13	823.2	NC92.1Z	S82.2	L73	Acute - Sudden Onset
16	LOWER LEG	Bone	Fracture	Tibial fracture- non-union	LE	32	15	LE.32.15	LE.32.15	823.2	FB80.8	S82.2	L73	Acute - Sudden Onset
16	LOWER LEG	Bone	Bone stress injury	Tibial stress fracture	LE	32	18	LE.32.18	LE.32.18	823.2	NC92.2	S82.2	L73	Repetitive - Gradual Onset
16	LOWER LEG	Bone	Fracture	Tibial greenstick fracture	LE	32	19	LE.32.19	LE.32.19	823.2	NC92.8	S82.2	L73	Acute - Sudden Onset
16	LOWER LEG	Bone	Bone stress injury	Tibial periostitis	LE	32	32	LE.32.32	LE.32.30	823.2	NC92.2	S82.2	L73	Repetitive - Gradual Onset
16	LOWER LEG	Bone	Bone stress injury	Medial tibial stress syndrome	LE	32	42	LE.32.42	LE.32.51	823.2	NC92.2	M76.8	L87	Repetitive - Gradual Onset
16	LOWER LEG	Bone	Fracture	Fibular fracture	LE	33	13	LE.33.13	LE.33.13	823.2	NC92.4	S82.4	L73	Acute - Sudden Onset
16	LOWER LEG	Bone	Bone stress injury	Fibular stress fracture	LE	33	18	LE.33.18	LE.33.18	823.2	NC92.4	S82.4	L73	Repetitive - Gradual Onset
16	LOWER LEG	Bone	Fracture	Fibular greenstick fracture	LE	33	19	LE.33.19	LE.33.19	823.2	NC92.4	S82.4	L73	Acute - Sudden Onset
16	LOWER LEG	Bone	Bone stress injury	Fibular periostitis	LE	33	32	LE.33.32	LE.33.30	823.2	NC92.4	M86.9	L70	Repetitive - Gradual Onset
16	LOWER LEG	Superficial tissues / skin	Contusion (superficial)	Leg contusion	LE	60	24	LE.60.24	LE.00.23	924.1	NC95.0	S80.1	S16	Acute - Sudden Onset
16	LOWER LEG	Superficial tissues / skin	Laceration	Leg laceration	LE	60	25	LE.60.25	LE.00.24	873	NC91.2	S81.9	S18	Acute - Sudden Onset
16	LOWER LEG	Superficial tissues / skin	Abrasion	Leg abrasion	LE	60	26	LE.60.26	LE.00.25	916	NC90.2	S80.8	S17	Acute - Sudden Onset
16	LOWER LEG	Vessels	Vascular trauma	Popliteal artery entrapment	LE	71	45	LE.71.45	LE.71.51	904.4	NC95.0Y	S85.0	A80	Repetitive - Gradual Onset
16	LOWER LEG	Non-specific	Injury without tissue type specified	Other leg injury	LE	90	0	LE.90.00	LE.00.00	844.9		S89.9	L81	Acute - Sudden Onset
16	LOWER LEG	Superficial tissues / skin	Stump injury	trans-tibial (below knee) amputation stump hematoma	LE	91	23	LE.91.23	NE85.6	955				Acute - Sudden Onset
16	LOWER LEG	Superficial tissues / skin	Stump injury	trans-tibial (below knee) amputation stump contusion	LE	91	24	LE.91.24	NE85.6	955				Acute - Sudden Onset
16	LOWER LEG	Superficial tissues / skin	Stump injury	trans-tibial (below knee) amputation stump laceration	LE	91	25	LE.91.25	NE85.6	955				Acute - Sudden Onset
16	LOWER LEG	Superficial tissues / skin	Stump injury	trans-tibial (below knee) amputation stump maceration	LE	91	26	LE.91.26	NE85.6	955				Acute - Sudden Onset
16	LOWER LEG	Cartilage / synovium / bursa	Stump injury	trans-tibial (below knee) amputation stump bursitis	LE	91	31	LE.91.31	NE85.6	955	FB50			Repetitive - Gradual Onset
16	LOWER LEG	Nervous	Stump injury	trans-tibial (below knee) amputation stump neuroma	LE	91	41	LE.91.41	NE85.3	955				Repetitive - Gradual Onset
16	LOWER LEG	Nervous	Stump injury	trans-tibial (below knee) amputation stump pain (including phantom pain)	LE	91	42	LE.91.42	NE85.6	955				Repetitive - Gradual Onset
17	ANKLE	Muscle / tendon	Tendon Rupture	Ankle extensor tendon rupture	AN	11	9	AN.11.09	AN.11.09	845		S86.2	L81	Acute - Sudden Onset
17	ANKLE	Muscle / tendon	Tendinopathy	Ankle extensor tendinopathy	AN	11	28	AN.11.28	AN.11.26	845		M77.5	L87	Repetitive - Gradual Onset
17	ANKLE	Muscle / tendon	Tendinopathy	Ankle extensor tenonsynovitis (including lace bite)	AN	11	29	AN.11.29	AN.11.27	845		M77.5	L87	Repetitive - Gradual Onset
17	ANKLE	Muscle / tendon	Tendinopathy	Flexor hallucis longus tendinopathy	AN	12	28	AN.12.28	AN.12.26	845		M77.5	L87	Repetitive - Gradual Onset
17	ANKLE	Muscle / tendon	Tendon Rupture	Tibialis posterior tendon rupture	AN	13	9	AN.13.09	AN.13.09	845		S86.1	L81	Acute - Sudden Onset
17	ANKLE	Muscle / tendon	Tendinopathy	Tibialis posterior tendinopathy	AN	13	28	AN.13.28	AN.13.26	845		M76.8	L87	Repetitive - Gradual Onset
17	ANKLE	Muscle / tendon	Tendinopathy	Tibialis anterior tendinopathy	AN	14	28	AN.14.28	AN.14.26	845		M76.8	L87	Repetitive - Gradual Onset
17	ANKLE	Muscle / tendon	Tendon Rupture	Peroneus tendon rupture	AN	15	9	AN.15.09	AN.15.09	845		S86.3	L81	Acute - Sudden Onset
17	ANKLE	Muscle / tendon	Tendinopathy	Peroneus tendon subluxation	AN	15	11	AN.15.11	AN.15.11	845		S86.3	L81	Acute - Sudden Onset
17	ANKLE	Muscle / tendon	Tendinopathy	Peroneus tendinopathy	AN	15	28	AN.15.28	AN.15.26	845		M76.7	L87	Repetitive - Gradual Onset
17	ANKLE	Nervous	Peripheral nerve injury	Ankle neuroma	AN	20	41	AN.20.41	AN.20.44	956.5	ND15	G57.9	N94	Repetitive - Gradual Onset
17	ANKLE	Nervous	Peripheral nerve injury	Ankle reflex sympathetic dystrophy	AN	20	43	AN.20.43	AN.20.41	956.5	ND15	M89.0	L99	Repetitive - Gradual Onset
17	ANKLE	Nervous	Peripheral nerve injury	Tarsal tunnel syndrome	AN	21	39	AN.21.39	AN.21.51	355.5	ND15	G57.5	N94	Repetitive - Gradual Onset
17	ANKLE	Bone	Fracture	Ankle fracture -Misc	AN	30	13	AN.30.13	AN.30.13	824.8	NC92	S82.8	L73	Acute - Sudden Onset
17	ANKLE	Bone	Fracture	Medial Malleolus fracture	AN	32	13	AN.32.13	AN.32.13	824	NC92.5	S82.5	L73	Acute - Sudden Onset
17	ANKLE	Bone	Fracture	Medial Malleolus avulsion fracture	AN	32	14	AN.32.14	AN.32.14	824	ND14.7	S82.5	L73	Acute - Sudden Onset
17	ANKLE	Bone	Physis injury	Medial Malleolus growth plate / physeal injury	AN	32	20	AN.32.20	AN.32.20	824	NC92.5	S85.2	L73	Acute - Sudden Onset
17	ANKLE	Bone	Bone contusion	Medial Malleolus contusion	AN	32	24	AN.32.24	AN.32.23	824	ND11.1	S90.0	S16	Acute - Sudden Onset
17	ANKLE	Bone	Fracture	Lateral Malleolus fracture	AN	33	13	AN.33.13	AN.33.13	824.2	NC92.6	S82.6	L73	Acute - Sudden Onset
17	ANKLE	Bone	Fracture	Lateral Malleolus avulsion fracture	AN	33	14	AN.33.14	AN.33.14	824.2	NC92.6	S82.6	L73	Acute - Sudden Onset
17	ANKLE	Bone	Physis injury	Lateral Malleolus growth plate / physeal injury	AN	33	20	AN.33.20	AN.33.20	824.2	NC92.6	S85.2	L73	Acute - Sudden Onset
17	ANKLE	Bone	Bone contusion	Lateral Malleolus contusion	AN	33	24	AN.33.24	AN.33.23	824.2	ND11.1	S90.0	S16	Acute - Sudden Onset
17	ANKLE	Bone	Fracture	Talus fracture	AN	34	13	AN.34.13	AN.34.13	825.2	ND13.1	S92.1	L74	Acute - Sudden Onset
17	ANKLE	Bone	Bone stress injury	Talus stress fracture	AN	34	18	AN.34.18	AN.34.18	825.2	ND13.1	S92.1	L74	Repetitive - Gradual Onset
17	ANKLE	Bone	Bone contusion	Talar dome contusion	AN	34	24	AN.34.24	AN.34.23	825.2	ND13	S92.1	L74	Acute - Sudden Onset
17	ANKLE	Bone	Bone stress injury	Os Trigonum / Steida process syndrome	AN	34	33	AN.34.33	AN.34.51	825.2	ND13	Q68.8	L82	Repetitive - Gradual Onset
17	ANKLE	Bone	Avascular necrosis	Talus avascular necrosis	AN	34	35	AN.34.35	AN.34.34	825.2	ME86.0	M87.8	L99	Repetitive - Gradual Onset
17	ANKLE	Cartilage / synovium / bursa	Arthritis	Ankle degenerative/ostoearthritis	AN	40	34	AN.40.34	AN.40.32	715.1	FA0	M19.8	L91	Repetitive - Gradual Onset
17	ANKLE	Cartilage / synovium / bursa	Cartilage	Talus osteochondral fracture	AN	41	17	AN.41.17	AN.34.17	825.2	ND13	S92.1	L74	Acute - Sudden Onset
17	ANKLE	Cartilage / synovium / bursa	Synovitis / capsulitis	Anterior ankle impingement	AN	42	30	AN.42.30	AN.40.51	715.1	ND14	S99.8	L81	Repetitive - Gradual Onset
17	ANKLE	Cartilage / synovium / bursa	Synovitis / capsulitis	Posterior ankle impingement	AN	43	30	AN.43.30	AN.40.52	715.1	ND14	S99.8	L81	Repetitive - Gradual Onset
17	ANKLE	Cartilage / synovium / bursa	Bursitis	Medial malleolus Bursitis	AN	44	31	AN.44.31	AN.61.29	845	FB50	M71.9	L87	Repetitive - Gradual Onset
17	ANKLE	Cartilage / synovium / bursa	Bursitis	Lateral malleolus Bursitis	AN	45	31	AN.45.31	AN.62.29	845	FB50	M71.9	L87	Repetitive - Gradual Onset
17	ANKLE	Ligament / joint capsule	Chronic Instability	Ankle functional instability	AN	50	12	AN.50.12	AN.40.12	715.1	ND14	M25.3	L99	Repetitive - Gradual Onset
17	ANKLE	Ligament / joint capsule	Joint Sprain	Deltoid ligament 1° sprain -acute	AN	51	1	AN.51.01	AN.51.01	845	ND14.71	S93.4	L77	Acute - Sudden Onset
17	ANKLE	Ligament / joint capsule	Joint Sprain	Deltoid ligament 2° sprain -acute	AN	51	2	AN.51.02	AN.51.02	845	ND14.71	S93.4	L77	Acute - Sudden Onset
17	ANKLE	Ligament / joint capsule	Joint Sprain	Deltoid ligament 3° sprain -acute	AN	51	3	AN.51.03	AN.51.03	845	ND14.71	S93.4	L77	Acute - Sudden Onset
17	ANKLE	Ligament / joint capsule	Joint Sprain	Deltoid ligament 1° sprain -chronic	AN	51	4	AN.51.04	AN.51.04	845	ND14.71	S93.4	L77	Repetitive - Gradual Onset
17	ANKLE	Ligament / joint capsule	Joint Sprain	Deltoid ligament 2° sprain -chronic	AN	51	5	AN.51.05	AN.51.05	845	ND14.71	S93.4	L77	Repetitive - Gradual Onset
17	ANKLE	Ligament / joint capsule	Joint Sprain	Deltoid ligament 3° sprain -chronic	AN	51	6	AN.51.06	AN.51.06	845	ND14.71	S93.4	L77	Repetitive - Gradual Onset
17	ANKLE	Ligament / joint capsule	Joint Sprain	Lateral ligament complex 1° sprain -acute	AN	52	1	AN.52.01	AN.52.01	845	ND14.70	S93.4	L77	Acute - Sudden Onset
17	ANKLE	Ligament / joint capsule	Joint Sprain	Lateral ligament complex 2° sprain -acute	AN	52	2	AN.52.02	AN.52.02	845	ND14.70	S93.4	L77	Acute - Sudden Onset
17	ANKLE	Ligament / joint capsule	Joint Sprain	Lateral ligament complex 3° sprain -acute	AN	52	3	AN.52.03	AN.52.03	845	ND14.70	S93.4	L77	Acute - Sudden Onset
17	ANKLE	Ligament / joint capsule	Joint Sprain	Lateral ligament complex 1° sprain -chronic	AN	52	4	AN.52.04	AN.52.04	845	ND14.70	S93.4	L77	Repetitive - Gradual Onset
17	ANKLE	Ligament / joint capsule	Joint Sprain	Lateral ligament complex 2° sprain -chronic	AN	52	5	AN.52.05	AN.52.05	845	ND14.70	S93.4	L77	Repetitive - Gradual Onset
17	ANKLE	Ligament / joint capsule	Joint Sprain	Lateral ligament complex 3° sprain -chronic	AN	52	6	AN.52.06	AN.52.06	845	ND14.70	S93.4	L77	Repetitive - Gradual Onset
17	ANKLE	Ligament / joint capsule	Joint Sprain	Anterior talofibular ligament 1° sprain -acute	AN	53	1	AN.53.01	AN.53.01	845	ND14.73	S93.4	L77	Acute - Sudden Onset
17	ANKLE	Ligament / joint capsule	Joint Sprain	Anterior talofibular ligament 2° sprain -acute	AN	53	2	AN.53.02	AN.53.02	845	ND14.73	S93.4	L77	Acute - Sudden Onset
17	ANKLE	Ligament / joint capsule	Joint Sprain	Anterior talofibular ligament 3° sprain -acute	AN	53	3	AN.53.03	AN.53.03	845	ND14.73	S93.4	L77	Acute - Sudden Onset
17	ANKLE	Ligament / joint capsule	Joint Sprain	Anterior talofibular ligament 1° sprain -chronic	AN	53	4	AN.53.04	AN.53.04	845	ND14.73	S93.4	L77	Repetitive - Gradual Onset
17	ANKLE	Ligament / joint capsule	Joint Sprain	Anterior talofibular ligament 2° sprain -chronic	AN	53	5	AN.53.05	AN.53.05	845	ND14.73	S93.4	L77	Repetitive - Gradual Onset
17	ANKLE	Ligament / joint capsule	Joint Sprain	Anterior talofibular ligament 3° sprain -chronic	AN	53	6	AN.53.06	AN.53.06	845	ND14.73	S93.4	L77	Repetitive - Gradual Onset
17	ANKLE	Ligament / joint capsule	Joint Sprain	Calcaneofibular ligament 1° sprain -acute	AN	54	1	AN.54.01	AN.54.01	845	ND14.70	S93.4	L77	Acute - Sudden Onset
17	ANKLE	Ligament / joint capsule	Joint Sprain	Calcaneofibular ligament 2° sprain -acute	AN	54	2	AN.54.02	AN.54.02	845	ND14.70	S93.4	L77	Acute - Sudden Onset
17	ANKLE	Ligament / joint capsule	Joint Sprain	Calcaneofibular ligament 3° sprain -acute	AN	54	3	AN.54.03	AN.54.03	845	ND14.70	S93.4	L77	Acute - Sudden Onset
17	ANKLE	Ligament / joint capsule	Joint Sprain	Calcaneofibular ligament 1° sprain -chronic	AN	54	4	AN.54.04	AN.54.04	845	ND14.70	S93.4	L77	Repetitive - Gradual Onset
17	ANKLE	Ligament / joint capsule	Joint Sprain	Calcaneofibular ligament 2° sprain -chronic	AN	54	5	AN.54.05	AN.54.05	845	ND14.70	S93.4	L77	Repetitive - Gradual Onset
17	ANKLE	Ligament / joint capsule	Joint Sprain	Calcaneofibular ligament 3° sprain -chronic	AN	54	6	AN.54.06	AN.54.06	845	ND14.70	S93.4	L77	Repetitive - Gradual Onset
17	ANKLE	Ligament / joint capsule	Joint Sprain	Posterior talofibular ligament 1° sprain -acute	AN	55	1	AN.55.01	AN.55.01	845	ND14.73	S93.4	L77	Acute - Sudden Onset
17	ANKLE	Ligament / joint capsule	Joint Sprain	Posterior talofibular ligament 2° sprain -acute	AN	55	2	AN.55.02	AN.55.02	845	ND14.73	S93.4	L77	Acute - Sudden Onset
17	ANKLE	Ligament / joint capsule	Joint Sprain	Posterior talofibular ligament 3° sprain -acute	AN	55	3	AN.55.03	AN.55.03	845	ND14.73	S93.4	L77	Acute - Sudden Onset
17	ANKLE	Ligament / joint capsule	Joint Sprain	Posterior talofibular ligament 1° sprain -chronic	AN	55	4	AN.55.04	AN.55.04	845	ND14.73	S93.4	L77	Repetitive - Gradual Onset
17	ANKLE	Ligament / joint capsule	Joint Sprain	Posterior talofibular ligament 2° sprain -chronic	AN	55	5	AN.55.05	AN.55.05	845	ND14.73	S93.4	L77	Repetitive - Gradual Onset
17	ANKLE	Ligament / joint capsule	Joint Sprain	Posterior talofibular ligament 3° sprain -chronic	AN	55	6	AN.55.06	AN.55.06	845	ND14.73	S93.4	L77	Repetitive - Gradual Onset
17	ANKLE	Ligament / joint capsule	Joint Sprain	Tibiofibular ligament syndesmosis (high ankle) 1° sprain -acute	AN	56	1	AN.56.01	AN.56.01	845	ND14.72	S93.4	L77	Acute - Sudden Onset
17	ANKLE	Ligament / joint capsule	Joint Sprain	Tibiofibular ligament syndesmosis (high ankle) 2° sprain -acute	AN	56	2	AN.56.02	AN.56.02	845	ND14.72	S93.4	L77	Acute - Sudden Onset
17	ANKLE	Ligament / joint capsule	Joint Sprain	Tibiofibular Diastasis	AN	56	9	AN.56.09	AN.56.51	845	ND14.72	S93.4	L77	Acute - Sudden Onset
17	ANKLE	Superficial tissues / skin	Laceration	Ankle laceration	AN	60	25	AN.60.25	AN.00.24	873	ND11.0	S91.3	S18	Acute - Sudden Onset
17	ANKLE	Superficial tissues / skin	Abrasion	Ankle abrasion	AN	60	26	AN.60.26	AN.00.25	916	ND11.0	S90.8	S17	Acute - Sudden Onset
17	ANKLE	Non-specific	Injury without tissue type specified	Other ankle injury	AN	90	0	AN.90.00	AN.00.00	845	ME86.0	S99.9	L81	Acute - Sudden Onset
17	ANKLE	Superficial tissues / skin	Contusion (superficial)	Ankle contusion	AN	90	24	AN.90.24	AN.00.23	824	ND11.1	S90.0	S16	Acute - Sudden Onset
17	ANKLE	Superficial tissues / skin	Stump injury	ankle disarticulation stump hematoma	AN	91	23	AN.91.23	NE85.6	955				Acute - Sudden Onset
17	ANKLE	Superficial tissues / skin	Stump injury	ankle disarticulation stump contusion	AN	91	24	AN.91.24	NE85.6	955				Acute - Sudden Onset
17	ANKLE	Superficial tissues / skin	Stump injury	ankle disarticulation stump laceration	AN	91	25	AN.91.25	NE85.6	955				Acute - Sudden Onset
17	ANKLE	Superficial tissues / skin	Stump injury	ankle disarticulation stump maceration	AN	91	26	AN.91.26	NE85.6	955				Acute - Sudden Onset
17	ANKLE	Cartilage / synovium / bursa	Stump injury	ankle disarticulation stump bursitis	AN	91	31	AN.91.31	NE85.6	955	FB50			Repetitive - Gradual Onset
17	ANKLE	Nervous	Stump injury	ankle disarticulation stump neuroma	AN	91	41	AN.91.41	NE85.3	955				Repetitive - Gradual Onset
17	ANKLE	Nervous	Stump injury	ankle disarticulation stump pain (including phantom pain)	AN	91	42	AN.91.42	NE85.6	955				Repetitive - Gradual Onset
18	FOOT	Muscle / tendon	Muscle Injury	Extensor digitorum brevis strain	FO	11	7	FO.11.07	FO.11.07	845.1		S96.1	L81	Acute - Sudden Onset
18	FOOT	Muscle / tendon	Muscle contusion	Extensor digitorum brevis contusion	FO	11	24	FO.11.24	FO.11.23	845.1		S96.1	L81	Acute - Sudden Onset
18	FOOT	Muscle / tendon	Muscle Injury	Intrinsic plantar muscle strain	FO	12	7	FO.12.07	FO.12.07	845.1		S96.8	L81	Acute - Sudden Onset
18	FOOT	Muscle / tendon	Tendinopathy	Plantar fasciitis	FO	13	33	FO.13.33	FO.51.31	845.1	FB40.1	M72.2	L87	Repetitive - Gradual Onset
18	FOOT	Nervous	Peripheral nerve injury	Morton's neuroma / interdigital neuroma	FO	21	41	FO.21.41	FO.21.44	956.5	ND15	G57.6	N94	Repetitive - Gradual Onset
18	FOOT	Nervous	Peripheral nerve injury	Plantar nerve injury	FO	22	39	FO.22.39	FO.22.51	355.6	FA31.4	S94.0	N81	Repetitive - Gradual Onset
18	FOOT	Bone	Fracture	Calcaneal fracture	FO	31	13	FO.31.13	FO.31.13	825	ND13.0	S92.0	L74	Acute - Sudden Onset
18	FOOT	Bone	Bone stress injury	Calcaneal stress fracture	FO	31	18	FO.31.18	FO.31.18	825	ND13.0	S92.0	L74	Repetitive - Gradual Onset
18	FOOT	Bone	Physis injury	Calcaneal apohysitis/ Sever's disease	FO	31	20	FO.31.20	FO.31.20	825	ND13.0	M92.6	L94	Acute - Sudden Onset
18	FOOT	Bone	Bone stress injury	Pump bumps	FO	31	32	FO.31.32	FO.31.51	845.1	ND13	M92.6	L94	Repetitive - Gradual Onset
18	FOOT	Bone	Bone stress injury	Heel spur	FO	31	33	FO.31.33	FO.31.37	825	ND13	M77.3	L87	Repetitive - Gradual Onset
18	FOOT	Bone	Fracture	Cuboid fracture	FO	32	13	FO.32.13	FO.32.13	825.2	ND13.7	S92.2	L74	Acute - Sudden Onset
18	FOOT	Bone	Bone stress injury	Cuboid stress fracture	FO	32	18	FO.32.18	FO.32.18	825.2	ND13.7	S92.2	L74	Repetitive - Gradual Onset
18	FOOT	Bone	Fracture	Navicular fracture	FO	33	13	FO.33.13	FO.33.13	825.2	ND13.B	S92.2	L74	Acute - Sudden Onset
18	FOOT	Bone	Fracture	Navicular fracture- non-union	FO	33	15	FO.33.15	FO.33.15	825.2	FB80.8	S92.2	L74	Acute - Sudden Onset
18	FOOT	Bone	Bone stress injury	Navicular stress fracture	FO	33	18	FO.33.18	FO.33.18	825.2	ND13.B	S92.2	L74	Repetitive - Gradual Onset
18	FOOT	Bone	Injury without tissue type specified	Accessory navicular	FO	33	23	FO.33.23	FO.33.51	825.2	ND13	Q68.8	L82	Repetitive - Gradual Onset
18	FOOT	Bone	Avascular necrosis	Navicular avascular necrosis	FO	33	35	FO.33.35	FO.33.34	825.2	ND13.B	M87.9	L99	Repetitive - Gradual Onset
18	FOOT	Bone	Fracture	Cuneiform fracture	FO	34	13	FO.34.13	FO.34.13	825.2	ND13.8	S92.2	L74	Acute - Sudden Onset
18	FOOT	Bone	Bone stress injury	Cuneiform stress fracture	FO	34	18	FO.34.18	FO.34.18	825.2	ND13	S92.2	L74	Repetitive - Gradual Onset
18	FOOT	Bone	Fracture	First metatarsal fracture	FO	35	13	FO.35.13	FO.35.13	825.2	ND13.3	S92.3	L74	Acute - Sudden Onset
18	FOOT	Bone	Fracture	Metatarsal fracture (2-4)	FO	36	13	FO.36.13	FO.36.13	825.2	ND13.3	S92.3	L74	Acute - Sudden Onset
18	FOOT	Bone	Bone stress injury	Metatarsal stress fracture	FO	36	18	FO.36.18	FO.36.18	825.2	ND13.3	S92.3	L74	Repetitive - Gradual Onset
18	FOOT	Bone	Avascular necrosis	Freiberg's infarction	FO	36	35	FO.36.35	FO.36.34	825.2	ND13	M92.7	L94	Repetitive - Gradual Onset
18	FOOT	Bone	Fracture	5th metatarsal fracture/ Jones' fracture	FO	37	13	FO.37.13	FO.37.13	825.2	ND13.3	S92.3	L74	Acute - Sudden Onset
18	FOOT	Bone	Fracture	Styloid process avulsion fracture	FO	37	14	FO.37.14	FO.37.14	825.2	NC92	S92.3	L74	Acute - Sudden Onset
18	FOOT	Bone	Fracture	Sesmoid fracture	FO	38	13	FO.38.13	FO.38.13	825.2	ND13	S92.9	L74	Acute - Sudden Onset
18	FOOT	Bone	Bone stress injury	Sesmoid stress fracture	FO	38	18	FO.38.18	FO.38.18	825.2	ND13	S92.9	L74	Repetitive - Gradual Onset
18	FOOT	Bone	Bone stress injury	Sesamoiditis	FO	38	33	FO.38.33	FO.38.31	825.2	ND13	S92.9	L74	Repetitive - Gradual Onset
18	FOOT	Bone	Bone stress injury	Bipartite sesmoids	FO	38	42	FO.38.42	FO.38.51	825.2	ND13	Q68.8	L82	Repetitive - Gradual Onset
18	FOOT	Bone	Fracture	Phalyngeal fracture- toes	FO	39	13	FO.39.13	FO.39.13	826	ND13.5	S92.5	L74	Acute - Sudden Onset
18	FOOT	Cartilage / synovium / bursa	Synovitis / capsulitis	Tarsal Coalition	FO	41	30	FO.41.30	FO.41.43	845.1	ND14	Q66.8	L82	Repetitive - Gradual Onset
18	FOOT	Cartilage / synovium / bursa	Synovitis / capsulitis	Fat pad contusion	FO	42	24	FO.42.24	FO.82.23	845.1	ND14	S99.8	L81	Acute - Sudden Onset
18	FOOT	Cartilage / synovium / bursa	Synovitis / capsulitis	Tarsal-metatarsal hypomobility	FO	42	30	FO.42.30	FO.42.43	845.1	ND14	M25.6	L20	Repetitive - Gradual Onset
18	FOOT	Cartilage / synovium / bursa	Synovitis / capsulitis	Hallux rigidus	FO	43	30	FO.43.30	FO.43.43	845.1	ND14.9	M20.2	L98	Repetitive - Gradual Onset
18	FOOT	Cartilage / synovium / bursa	Synovitis / capsulitis	Turf toe	FO	44	30	FO.44.30	FO.43.31	845.1	ND14.9	S93.5	L79	Repetitive - Gradual Onset
18	FOOT	Cartilage / synovium / bursa	Arthritis	Metatarsophalangeal joint osteoarthritis	FO	45	34	FO.45.34	FO.43.32	715.1	FA0	M19.8	L91	Repetitive - Gradual Onset
18	FOOT	Cartilage / synovium / bursa	Cartilage	Osteochondritis / Kohler's disease	FO	46	37	FO.46.37	FO.33.40	825.2	ND14	M92.6	L94	Acute - Sudden Onset
18	FOOT	Ligament / joint capsule	Joint Sprain	Subtalar dislocation	FO	51	10	FO.51.10	FO.41.10	845.1	ND14.3	S93.0	L80	Acute - Sudden Onset
18	FOOT	Ligament / joint capsule	Joint Sprain	Cuboid subluxation	FO	52	11	FO.52.11	FO.41.11	845.1	ND14.3	S93.3	L80	Acute - Sudden Onset
18	FOOT	Ligament / joint capsule	Joint Sprain	First MTP joint dislocation	FO	53	10	FO.53.10	FO.43.10	838	ND14.10	S93.5	L79	Acute - Sudden Onset
18	FOOT	Ligament / joint capsule	Joint Sprain	2nd, 3, 4, 5th MTP joint disolcation	FO	54	10	FO.54.10	FO.44.10	838	ND14.20	S93.6	L79	Acute - Sudden Onset
18	FOOT	Ligament / joint capsule	Joint Sprain	Midfoot sprain	FO	55	1	FO.55.01	FO.45.01	845.1	ND14.AY	S93.6	L79	Acute - Sudden Onset
18	FOOT	Ligament / joint capsule	Joint Sprain	Lisfranc injury	FO	56	3	FO.56.03	FO.45.03	845.1	ND14.4	S93.3	L79	Acute - Sudden Onset
18	FOOT	Superficial tissues / skin	Contusion (superficial)	Foot contusion	FO	60	24	FO.60.24	FO.00.23	845.1	ND16.0	S99.8	S16	Acute - Sudden Onset
18	FOOT	Superficial tissues / skin	Laceration	Foot laceration	FO	60	25	FO.60.25	FO.00.24	873	ND12.60	S91.3	S18	Acute - Sudden Onset
18	FOOT	Superficial tissues / skin	Abrasion	Foot abrasion	FO	60	26	FO.60.26	FO.00.25	916	ND11.7	S90.8	S17	Acute - Sudden Onset
18	FOOT	Superficial tissues / skin	Injury without tissue type specified	Other toe nail injury	FO	80	0	FO.80.00	FO.80.52	842.1	ND10	S90.9	S16	Acute - Sudden Onset
18	FOOT	Superficial tissues / skin	Contusion (superficial)	Subungal hematoma	FO	80	24	FO.80.24	FO.80.51	842.1	ND11.6	S90.2	S16	Acute - Sudden Onset
18	FOOT	Superficial tissues / skin	Injury without tissue type specified	Ingrown Toenail	FO	80	33	FO.80.33	FO.80.53	703.1	ND10	L60.0	S94	Repetitive - Gradual Onset
18	FOOT	Superficial tissues / skin	Abrasion	Lace syndrome	FO	81	33	FO.81.33	FO.81.31	845.1	ND11	S99.8	L81	Repetitive - Gradual Onset
18	FOOT	Superficial tissues / skin	Abrasion	Foot blister	FO	83	27	FO.83.27	FO.83.45	912.2	ND11.5	R21	S06	Acute - Sudden Onset
18	FOOT	Superficial tissues / skin	Abrasion	Great toe blister	FO	84	27	FO.84.27	FO.84.45	912.2	ND11.5	R21	S06	Acute - Sudden Onset
18	FOOT	Superficial tissues / skin	Abrasion	Other toe blister	FO	85	27	FO.85.27	FO.85.45	912.2	ND11.5	R21	S06	Acute - Sudden Onset
18	FOOT	Non-specific	Injury without tissue type specified	Other foot injury	FO	90	0	FO.90.00	FO.00.00	845.1		S99.9	L81	Acute - Sudden Onset
18	FOOT	Non-specific	Injury without tissue type specified	Metatarsalgia	FO	90	42	FO.90.42	FO.52.51	845.1		M77.4	L17	Repetitive - Gradual Onset
18	FOOT	Superficial tissues / skin	Stump injury	partial foot amputation stump hematoma	FO	91	23	FO.91.23	NE85.6	955				Acute - Sudden Onset
18	FOOT	Superficial tissues / skin	Stump injury	partial foot amputation stump contusion	FO	91	24	FO.91.24	NE85.6	955				Acute - Sudden Onset
18	FOOT	Superficial tissues / skin	Stump injury	partial foot amputation stump laceration	FO	91	25	FO.91.25	NE85.6	955				Acute - Sudden Onset
18	FOOT	Superficial tissues / skin	Stump injury	partial foot amputation stump maceration	FO	91	26	FO.91.26	NE85.6	955				Acute - Sudden Onset
18	FOOT	Cartilage / synovium / bursa	Stump injury	partial foot amputation stump bursitis	FO	91	31	FO.91.31	NE85.6	955	FB50			Repetitive - Gradual Onset
18	FOOT	Nervous	Stump injury	partial foot amputation stump neuroma	FO	91	41	FO.91.41	NE85.3	955				Repetitive - Gradual Onset
18	FOOT	Nervous	Stump injury	partial foot amputation stump pain (including phantom pain)	FO	91	42	FO.91.42	NE85.6	955	ND14		L82	Repetitive - Gradual Onset
18	FOOT	Non-specific	Injury without tissue type specified	Hyperpronation / pes planus	FO	91	42	FO.91.42	FO.41.51	734	ND14			Repetitive - Gradual Onset
18	FOOT	Non-specific	Injury without tissue type specified	Excessive supination / pes cavus	FO	92	42	FO.92.42	FO.41.52	845.1	ND14	Q66.7	L82	Repetitive - Gradual Onset
18	FOOT	Non-specific	Injury without tissue type specified	Sinus Tarsi Syndrome	FO	93	42	FO.93.42	FO.41.53	845.1		M25.5	L20	Repetitive - Gradual Onset
18	FOOT	Non-specific	Injury without tissue type specified	Fat pad Syndrome	FO	94	42	FO.94.42	FO.82.51	845.1		S99.8	L81	Repetitive - Gradual Onset
18	FOOT	Non-specific	Injury without tissue type specified	Hallux valgus / bunion	FO	95	42	FO.95.42	FO.43.52	845.1	FA30.0	M20.1	L98	Repetitive - Gradual Onset
18	FOOT	Non-specific	Injury without tissue type specified	5th MTP bunionette	FO	96	42	FO.96.42	FO.44.51	845.1	ND13	M20.5	L98	Repetitive - Gradual Onset
19	NON-SPECIFIC INJURY	Superficial tissues / skin	Contusion (superficial)	Contusion	OO	60	24	OO.60.24	MS.00.23	845.1	ND56.5	R29.8	L29	Acute - Sudden Onset
19	NON-SPECIFIC INJURY	Superficial tissues / skin	Laceration	Skin laceration - other	OO	60	25	OO.60.25	MS.00.24	873	ND31	R29.8	L29	Acute - Sudden Onset
19	NON-SPECIFIC INJURY	Superficial tissues / skin	Abrasion	Skin abrasion	OO	60	26	OO.60.26	MS.00.25	916		R29.8	L29	Acute - Sudden Onset
19	NON-SPECIFIC INJURY	Superficial tissues / skin	Abrasion	Callus, corn	OO	60	27	OO.60.27	DE.01.53	700	ME66.6	L84	S20	Acute - Sudden Onset
19	NON-SPECIFIC INJURY	Internal Organs	Organ Trauma	Drowning	OO	80	1	OO.80.01			NF08.1			Acute - Sudden Onset
19	NON-SPECIFIC INJURY	Non-specific	Injury without tissue type specified	Non-Specific Injury	OO	90	0	OO.90.00	MS.00.00	781.9		R29.8	L29	Acute - Sudden Onset
19	NON-SPECIFIC INJURY	Non-specific	Injury without tissue type specified	Multiple trauma (major)	OO	91	0	OO.91.00	MS.00.51	781.9		T06.3	A81	Acute - Sudden Onset
19	NON-SPECIFIC INJURY	Non-specific	Stump injury	Upper extremity stump injury	OO	91	44	OO.91.44	NE85.6					Acute - Sudden Onset
19	NON-SPECIFIC INJURY	Non-specific	Injury without tissue type specified	Multiple MSK injuries	OO	92	0	OO.92.00	MS.00.52	781.9		T06.3	A81	Acute - Sudden Onset
19	NON-SPECIFIC INJURY	Non-specific	Stump injury	Lower extremity stump injury	OO	92	44	OO.92.44	NE85.6					Acute - Sudden Onset
20	CARDIOVASCULAR	Illness	Immunological / Inflammatory	Myocarditis	CV	1	74	CV.01.74	CV.02.53	422		I51.4	K84	Illness
20	CARDIOVASCULAR	Illness	Thrombotic / hemorrhagic	Cephalic venous insufficiency	CV	1	78	CV.01.78	SH.72.52	900.9		I87.2	K95	Illness
20	CARDIOVASCULAR	Illness	Degenerative or chronic	Hypertrophic and other cardiomyopathy	CV	1	79	CV.01.79	CV.02.52	425.4		I42.2	K84	Illness
20	CARDIOVASCULAR	Illness	Unknown or not specified	Other cardiovascular illness / disorder	CV	1	83	CV.01.83	CV.00.00	429.2		I51.6	K84	Illness
20	CARDIOVASCULAR	Illness	Immunological / Inflammatory	Pericarditis	CV	2	74	CV.02.74	CV.02.54	420		I30.9	K70	Illness
20	CARDIOVASCULAR	Illness	Thrombotic / hemorrhagic	Deep vein thrombosis	CV	2	78	CV.02.78	CV.05.54	671		I82.9	K94	Illness
20	CARDIOVASCULAR	Illness	Degenerative or chronic	Angina Syndrome	CV	2	79	CV.02.79	CV.05.51	413		I20.9	K74	Illness
20	CARDIOVASCULAR	Illness	Unknown or not specified	Sudden Cardiac Death	CV	2	83	CV.02.83	CV.01.51	429.8		I46.1	K84	Illness
20	CARDIOVASCULAR	Illness	Thrombotic / hemorrhagic	Leg thrombosis/atherosclerosis	CV	3	78	CV.03.78	LE.71.52	904.4		I74.3	K92	Illness
20	CARDIOVASCULAR	Illness	Degenerative or chronic	Hypertension	CV	3	79	CV.03.79	CV.05.53	401		I10	K86	Illness
20	CARDIOVASCULAR	Illness	Unknown or not specified	Athletic Heart Syndrome	CV	3	83	CV.03.83	CV.02.51	429.8		I46.1	K84	Illness
20	CARDIOVASCULAR	Illness	Thrombotic / hemorrhagic	Varicose veins - leg	CV	4	78	CV.04.78	LE.72.51	904.4	MC88	I83.9	K95	Illness
20	CARDIOVASCULAR	Illness	Unknown or not specified	Arrythmia - Dysrythmia	CV	4	83	CV.04.83	CV.03.51	427.8	MC81	I49.9	K80	Illness
20	CARDIOVASCULAR	Illness	Thrombotic / hemorrhagic	Leg deep vein thrombosis	CV	5	78	CV.05.78	LE.72.52	904.4		I80.2	K94	Illness
20	CARDIOVASCULAR	Illness	Unknown or not specified	Autonomic Dysfunction (syncope)	CV	5	83	CV.05.83	CV.03.55	780.2		R55	N99	Illness
20	CARDIOVASCULAR	Illness	Thrombotic / hemorrhagic	Axillary artery thrombosis	CV	6	78	CV.06.78	SH.71.51	903		I74.2	K92	Illness
20	CARDIOVASCULAR	Illness	Thrombotic / hemorrhagic	Leg venous insufficiency	CV	8	78	CV.06.78	LE.72.53	904.4		I74.2	K95	Illness
20	CARDIOVASCULAR	Illness	Unknown or not specified	Aortic Valve disease	CV	6	83	CV.06.83	CV.04.51	424.1	MC83	I35.9	K83	Illness
20	CARDIOVASCULAR	Illness	Thrombotic / hemorrhagic	Infarction/Stenosis	CV	9	78	CV.07.78	CV.05.52	410		I82.8	K75	Illness
20	CARDIOVASCULAR	Illness	Thrombotic / hemorrhagic	Cephalic venous thrombosis	CV	7	78	CV.07.78	SH.72.51	900.9		I82.8	K94	Illness
20	CARDIOVASCULAR	Illness	Unknown or not specified	Pulmonary Valve Disease	CV	7	83	CV.07.83	CV.04.52	424.3	MC83	I37.9	K83	Illness
20	CARDIOVASCULAR	Illness	Unknown or not specified	Tricuspid Valve Disease	CV	8	83	CV.08.83	CV.04.53	424.2	MC83	I36.9	K83	Illness
20	CARDIOVASCULAR	Illness	Unknown or not specified	Mitral Valve Disease	CV	9	83	CV.09.83	CV.04.54	424.4	MC83	I34.9	K83	Illness
21	DERMATOLOGICAL	Illness	Unknown or not specified	Other dermatologic illness / disorder	DE	0	83	DE.00.83	DE.00.00	709.8		L98.8	S99	Illness
21	DERMATOLOGICAL	Illness	Allergic	Allergic reaction - Hives	DE	1	71	DE.01.71	DE.07.53	702.8		L50.9	S98	Illness
21	DERMATOLOGICAL	Illness	Environmental - non exercise	Burn	DE	1	73	DE.01.73	DE.01.51	949		T30.0	S14	Illness
21	DERMATOLOGICAL	Illness	Immunological / Inflammatory	Contact dermatitis	DE	1	74	DE.01.74	DE.07.52	692.8		L25.9	S88	Illness
21	DERMATOLOGICAL	Illness	Infection	Tinea pedis (athlete's foot), cruris (jock itch) or ringworm	DE	1	75	DE.01.75	DE.03.51	709.8		B35.3	S74	Illness
21	DERMATOLOGICAL	Illness	Neoplasm	Irregular mole / skin lesion	DE	1	76	DE.01.76	DE.07.55	216.9		D48.5	S79	Illness
21	DERMATOLOGICAL	Illness	Unknown or not specified	Skin ulcer	DE	1	83	DE.01.83	DE.02.51	707	ME66.6	L89.9	S97	Illness
21	DERMATOLOGICAL	Illness	Immunological / Inflammatory	Eczema	DE	2	74	DE.02.74	DE.07.51	701.8		L20.9	S87	Illness
21	DERMATOLOGICAL	Illness	Infection	Scabies or 'Pediculosis (lice)	DE	2	75	DE.02.75	DE.04.51	133		B86	S72	Illness
21	DERMATOLOGICAL	Illness	Neoplasm	Skin Neoplasm	DE	2	76	DE.02.76	DE.00.42	173		D48.5	S79	Illness
21	DERMATOLOGICAL	Illness	Unknown or not specified	Black heel (Talon noir)	DE	2	83	DE.02.83	DE.02.52	700	ME66.6	R23.3	S29	Illness
21	DERMATOLOGICAL	Illness	Immunological / Inflammatory	Acne vulgaris	DE	3	74	DE.03.74	DE.06.56	686	ME66.6	L70.9	S96	Illness
21	DERMATOLOGICAL	Illness	Infection	Herpes gladiatorum or Herpes simplex / genitalis	DE	3	75	DE.03.75	DE.05.52	54		B00.9	S71	Illness
21	DERMATOLOGICAL	Illness	Unknown or not specified	Pityriasis Rosea	DE	3	83	DE.03.83	DE.07.54	696.3	ME66.6	L42	S90	Illness
21	DERMATOLOGICAL	Illness	Infection	Molluscum contagiosum	DE	4	75	DE.04.75	DE.05.53	78		B08.1	S95	Illness
21	DERMATOLOGICAL	Illness	Unknown or not specified	Systemic disease of nail	DE	4	83	DE.04.83	HA.80.53	842.1		L60.9	L81	Illness
21	DERMATOLOGICAL	Illness	Infection	Warts	DE	5	75	DE.05.75	DE.05.54	686.8		B07	S03	Illness
21	DERMATOLOGICAL	Illness	Infection	Cellulitis or Folliculitis	DE	6	75	DE.06.75	DE.06.51	682.9		R23.8	S29	Illness
21	DERMATOLOGICAL	Illness	Infection	Boil, Abcess, Furuncle (bacterial)	DE	7	75	DE.07.75	DE.06.53	686		L73.9	S99	Illness
21	DERMATOLOGICAL	Illness	Infection	Impetigo / staphylococcal skin infection	DE	8	75	DE.08.75	DE.06.54	694.9		L01.0	S84	Illness
21	DERMATOLOGICAL	Illness	Infection	Methicillin Resistant Staphylococcus Aureus (MRSA)	DE	9	75	DE.09.75	DE.06.55	686.9		A49.0	A78	Illness
22	DENTAL	Illness	Infection	Dental carries	DT	1	75	DT.01.75		521		K02		Illness
22	DENTAL	Illness	Infection	Periodontitis	DT	2	75	DT.02.75		523.8		K05.6		Illness
23	ENDOCRINOLOGICAL	Illness	Unknown or not specified	Other endocrinologic illness / disorder	EN	0	83	EN.00.83	EN.00.00	259.8		E88.9	T99	Illness
23	ENDOCRINOLOGICAL	Illness	Neoplasm	Ovarian Cyst	EN	1	76	EN.01.76	EN.01.22	259.8		N83.2	X99	Illness
23	ENDOCRINOLOGICAL	Illness	Metabolic / nutritional	Hypoglycemia	EN	1	77	EN.01.77	EN.02.52	251.2		E16.2	T87	Illness
23	ENDOCRINOLOGICAL	Illness	Degenerative or chronic	Obesity / overweight	EN	1	79	EN.01.79	EN.01.58	259.8		E66.9	T82	Illness
23	ENDOCRINOLOGICAL	Illness	Multiple	Pituitary stress syndrome	EN	1	82	EN.01.82	EN.01.52	259.8		E11.9	T90	Illness
23	ENDOCRINOLOGICAL	Illness	Neoplasm	Pituitary Neoplasm	EN	2	76	EN.02.76	EN.01.42	194		D48.9	A99	Illness
23	ENDOCRINOLOGICAL	Illness	Metabolic / nutritional	Anabolic Steroid Related	EN	2	77	EN.02.77	EN.01.59	259.8		F55	P18	Illness
23	ENDOCRINOLOGICAL	Illness	Multiple	Short luteal Phase / Anovulation	EN	2	82	EN.02.82	EN.01.53	259.8		N95.2	X11	Illness
23	ENDOCRINOLOGICAL	Illness	Metabolic / nutritional	Hypercholesterolemia	EN	3	77	EN.03.77	EN.02.51	272.4		E78.5	T93	Illness
23	ENDOCRINOLOGICAL	Illness	Multiple	Amenorrhea / Oligomenorrhea	EN	3	82	EN.03.82	EN.01.54	259.8		N91.1	X05	Illness
23	ENDOCRINOLOGICAL	Illness	Multiple	Dysmenorrhea / Menorrhagia	EN	4	82	EN.04.82	EN.01.55	259.8		N92.0	X07	Illness
23	ENDOCRINOLOGICAL	Illness	Multiple	Delayed menarche	EN	5	82	EN.05.82	EN.01.56	259.8		E30.0	T99	Illness
23	ENDOCRINOLOGICAL	Illness	Multiple	Cushing's syndrome	EN	6	82	EN.06.82	EN.01.57	259.8		E24.9	T99	Illness
23	ENDOCRINOLOGICAL	Illness	Multiple	Hyperthyroid	EN	7	82	EN.07.82	EN.02.53	246		E05.9	T85	Illness
23	ENDOCRINOLOGICAL	Illness	Multiple	Hypothyroid	EN	8	82	EN.08.82	EN.02.54	246		E03.9	T86	Illness
23	ENDOCRINOLOGICAL	Illness	Multiple	Acromegaly	EN	9	82	EN.09.82	EN.02.55	253		E22.0	T99	Illness
24	GASTROINTESTINAL	Illness	Unknown or not specified	Other gastrointestinal illness / disorder	GI	0	83	GI.00.83	GI.00.00	558.9		K92.9	D99	Illness
24	GASTROINTESTINAL	Illness	Infection	Traveller’s Diarrhea	GI	1	75	GI.01.75	GI.05.38	787.9	ME05.1	A09.0	D73	Illness
24	GASTROINTESTINAL	Illness	Neoplasm	Gastrointestinal Neoplasm	GI	1	76	GI.01.76	GI.00.42	159		D13.9	D78	Illness
24	GASTROINTESTINAL	Illness	Metabolic / nutritional	Celiac Disease	GI	1	77	GI.01.77	GI.05.52	579		K90.0	D99	Illness
24	GASTROINTESTINAL	Illness	Thrombotic / hemorrhagic	Hemorrhoids	GI	1	78	GI.01.78	GI.07.51	455		K64.9	D95	Illness
24	GASTROINTESTINAL	Illness	Unknown or not specified	Gastroesophageal Reflux (GERD)	GI	1	83	GI.01.83	GI.01.51	530		K21.9	D84	Illness
24	GASTROINTESTINAL	Illness	Infection	Runner’s Diarrhea	GI	2	75	GI.02.75	GI.06.38	787.9		K59.1	D11	Illness
24	GASTROINTESTINAL	Illness	Metabolic / nutritional	Malabsorbtion Syndrome	GI	2	77	GI.02.77	GI.05.54	579		K90.9	D99	Illness
24	GASTROINTESTINAL	Illness	Unknown or not specified	Stomach Ulcer	GI	2	83	GI.02.83	GI.02.51	536.8		K27.9	D86	Illness
24	GASTROINTESTINAL	Illness	Immunological / Inflammatory	Gastritis	GI	3	74	GI.03.74	GI.01.52	530		K29.7	D87	Illness
24	GASTROINTESTINAL	Illness	Infection	Other Colon Infection	GI	3	75	GI.03.75	GI.06.51	558.9		A09.0	D73	Illness
24	GASTROINTESTINAL	Illness	Metabolic / nutritional	Irritable Bowel Syndrome	GI	3	77	GI.03.77	GI.00.51	564.1		K58.9	D93	Illness
24	GASTROINTESTINAL	Illness	Unknown or not specified	Superior Mesenteric Disease	GI	3	83	GI.03.83	GI.06.54	558.9		K55.1	D99	Illness
24	GASTROINTESTINAL	Illness	Infection	Appendicitis	GI	4	75	GI.04.75	GI.06.52	541		K37	D88	Illness
24	GASTROINTESTINAL	Illness	Metabolic / nutritional	Crohn’s Disease	GI	4	77	GI.04.77	GI.05.53	558.9		K50.9	D94	Illness
24	GASTROINTESTINAL	Illness	Unknown or not specified	Abdominal pain / illness -Misc	GI	4	83	GI.04.83	AB.00.51	789		R10.4	D01	Illness
24	GASTROINTESTINAL	Illness	Infection	Gastroenteritis	GI	5	75	GI.05.75	GI.07.38	558		A09.9	D73	Illness
24	GASTROINTESTINAL	Illness	Unknown or not specified	Gall Stones	GI	5	83	GI.05.83	GI.03.51	574		K80.8	D98	Illness
24	GASTROINTESTINAL	Illness	Infection	Duodeual Ulcer	GI	6	75	GI.06.75	GI.05.51	532		K26.9	D85	Illness
24	GASTROINTESTINAL	Illness	Unknown or not specified	Pancreatic Disease	GI	6	83	GI.06.83	GI.04.51	577		K86.9	D99	Illness
24	GASTROINTESTINAL	Illness	Allergic	Allergy Syndrome	GI	7	71	GI.07.71	GI.00.52	564.1		T78.4	A92	Illness
24	GASTROINTESTINAL	Illness	Infection	Hepatitis	GI	7	75	GI.07.75	GI.03.52	573		K75.9	D97	Illness
24	GASTROINTESTINAL	Illness	Unknown or not specified	Ulcerative Colitis	GI	7	83	GI.07.83	GI.06.53	558.9		K51.9	D94	Illness
24	GASTROINTESTINAL	Illness	Unknown or not specified	Anal Fissure	GI	8	83	GI.08.83	GI.07.52	565		K60.2	D95	Illness
24	GASTROINTESTINAL	Illness	Unknown or not specified	Stitch	GI	9	83	GI.09.83	GI.00.53	536		R10.4	D01	Illness
25	GENITOURINARY	Illness	Unknown or not specified	Other GU illness / disorder	GU	0	83	GU.00.83	GU.00.00	599.9		N36.9	U99	Illness
25	GENITOURINARY	Illness	Environmental - exercise related	Exercise Induced Hematuria	GU	1	72	GU.01.72	GU.01.51	599.7	MF50.4	R31	U06	Illness
25	GENITOURINARY	Illness	Infection	Pyelonephritis	GU	1	75	GU.01.75	GU.01.38	590.8		N12	U70	Illness
25	GENITOURINARY	Illness	Neoplasm	Genitourinary Neoplasm	GU	1	76	GU.01.76	GU.00.42	179		D48.9	A99	Illness
25	GENITOURINARY	Illness	Unknown or not specified	Polycyctic Ovaries	GU	1	83	GU.01.83	GU.06.51	753		E28.2	T99	Illness
25	GENITOURINARY	Illness	Environmental - exercise related	Myoglobinuria (Rhabdomyolysis)	GU	2	72	GU.02.72	GU.00.51	791.3		M62.8	L99	Illness
25	GENITOURINARY	Illness	Infection	Urinary Tract Infection	GU	2	75	GU.02.75	GU.02.38	595		N39.0	U71	Illness
25	GENITOURINARY	Illness	Neoplasm	Testicle Neoplasm	GU	2	76	GU.02.76	GU.05.42	186		C62.9	Y79	Illness
25	GENITOURINARY	Illness	Unknown or not specified	Renal Stone	GU	2	83	GU.02.83	GU.01.52	788		N20.0	U95	Illness
25	GENITOURINARY	Illness	Infection	Cystitis	GU	3	75	GU.03.75	GU.03.38	595		N39.0	U71	Illness
25	GENITOURINARY	Illness	Neoplasm	Ovary Neoplasm	GU	3	76	GU.03.76	GU.06.42	183		D39.1	X81	Illness
25	GENITOURINARY	Illness	Unknown or not specified	Testicle Torsion	GU	3	83	GU.03.83	GU.05.52	608.2		N44	Y99	Illness
25	GENITOURINARY	Illness	Infection	Sexually Transmitted Disease	GU	4	75	GU.04.75	GU.04.38	99		A64	A78	Illness
25	GENITOURINARY	Illness	Unknown or not specified	Ovarian Failure	GU	4	83	GU.04.83	GU.06.52	256		E28.3	T99	Illness
25	GENITOURINARY	Illness	Infection	Epididymitis	GU	5	75	GU.05.75	GU.05.51	604		N45.9	Y74	Illness
25	GENITOURINARY	Illness	Unknown or not specified	Athletic Pseudonephritis	GU	5	83	GU.05.83	GU.01.53	590.9		R82.8	U98	Illness
25	GENITOURINARY	Illness	Unknown or not specified	Pregnancy	GU	6	83	GU.06.83	GU.06.53	599.9		Z33	W78	Illness
25	GENITOURINARY	Illness	Unknown or not specified	Renal Failure	GU	7	83	GU.07.83	GU.01.54	593		N19	U99	Illness
25	GENITOURINARY	Illness	Unknown or not specified	Vaginal Discharge	GU	8	83	GU.08.83	GU.06.54	616.1		N89.8	X14	Illness
26	HAEMATOLOGIC	Illness	Unknown or not specified	Other hematologic illness / disorder	BL	0	83	BL.00.83	BL.00.00	289.9		D75.9	B99	Illness
26	HAEMATOLOGIC	Illness	Neoplasm	Hemotologic Neoplasm	BL	1	76	BL.01.76	BL.00.42	208		C95.9	B73	Illness
26	HAEMATOLOGIC	Illness	Metabolic / nutritional	Iron deficiency anemia	BL	1	77	BL.01.77	BL.01.51	281.9		D50.9	B80	Illness
26	HAEMATOLOGIC	Illness	Thrombotic / hemorrhagic	Platelet Disorder	BL	1	78	BL.01.78	BL.03.51	287.9		D69.9	B83	Illness
26	HAEMATOLOGIC	Illness	Unknown or not specified	Splenomegaly	BL	1	83	BL.01.83	BL.04.51	789.2		R16.1	B87	Illness
26	HAEMATOLOGIC	Illness	Neoplasm	Hodgkin's Lymphoma	BL	2	76	BL.02.76	BL.06.42	202.8		C81.9	B72	Illness
26	HAEMATOLOGIC	Illness	Metabolic / nutritional	non-Iron deficiency anemia	BL	2	77	BL.02.77	BL.01.52	281.9		D64.9	B82	Illness
26	HAEMATOLOGIC	Illness	Thrombotic / hemorrhagic	Clotting Disorder	BL	2	78	BL.02.78	BL.03.52	287.9		D69.9	B83	Illness
26	HAEMATOLOGIC	Illness	Neoplasm	Non-Hodgkin's Lymphoma	BL	3	76	BL.03.76	BL.07.42	202.8		C85.9	B72	Illness
26	HAEMATOLOGIC	Illness	Metabolic / nutritional	Vitamin B12 Deficiency	BL	3	77	BL.03.77	BL.01.53	281.1		E53.8	T91	Illness
26	HAEMATOLOGIC	Illness	Thrombotic / hemorrhagic	Sickle cell trait / disorder	BL	3	78	BL.03.78	BL.05.51	282.6		D57.8	B78	Illness
26	HAEMATOLOGIC	Illness	Metabolic / nutritional	Pre-latent iron deficiency	BL	4	77	BL.04.77	BL.02.51	281.9		D50.8	B80	Illness
26	HAEMATOLOGIC	Illness	Metabolic / nutritional	Latent iron deficiency	BL	5	77	BL.05.77	BL.02.52	281.9		D50.8	B80	Illness
27	MUSCULOSKELETAL	Illness	Multiple	Fibromyalgia	MS	0	82	MS.00.82	RM.06.51	729		M79.7	L18	Illness
27	MUSCULOSKELETAL	Illness	Environmental - exercise related	Non-Specific Cramps	MS	1	72	MS.01.72	MS.00.08	845.1	NF06.3	R29.8	L29	Illness
27	MUSCULOSKELETAL	Illness	Immunological / Inflammatory	Other Rheumatic illness / disorder	MS	1	74	MS.01.74	RM.00.00	716.8		M13.9	L91	Illness
27	MUSCULOSKELETAL	Illness	Infection	MSK sepsis	MS	1	75	MS.01.75	FO.00.38	845.1		A41.9	A78	Illness
27	MUSCULOSKELETAL	Illness	Degenerative or chronic	Osteoporosis	MS	1	79	MS.01.79	RM.01.51	733		M81.9	L95	Illness
27	MUSCULOSKELETAL	Illness	Multiple	Marfan Syndrome	MS	1	82	MS.01.82	RM.05.57	759.8		Q87.4	A90	Illness
27	MUSCULOSKELETAL	Illness	Unknown or not specified	Regional Pain Syndrome	MS	1	83	MS.01.83	RM.03.51	716.8		M89.0	L99	Illness
27	MUSCULOSKELETAL	Illness	Immunological / Inflammatory	Gout	MS	2	74	MS.02.74	RM.02.51	716.8	FA25	M10.0	T92	Illness
27	MUSCULOSKELETAL	Illness	Infection	Osteomyelitis	MS	2	75	MS.02.75	TH.32.39	730		M86.9	L70	Illness
27	MUSCULOSKELETAL	Illness	Unknown or not specified	Exostosis	MS	2	83	MS.02.83	LE.32.37	823.2		D16.9	L97	Illness
27	MUSCULOSKELETAL	Illness	Immunological / Inflammatory	Pseudogout / Chondrocalcinosis	MS	3	74	MS.03.74	RM.02.52	716.8		M11.2	T92	Illness
27	MUSCULOSKELETAL	Illness	Infection	Brodie's abscess	MS	3	75	MS.03.75	TH.32.35	821		M86.8	L70	Illness
27	MUSCULOSKELETAL	Illness	Multiple	Ehlers-Danlos Syndrome	MS	3	82	MS.03.82	RM.05.58	729.9		Q79.6	L82	Illness
27	MUSCULOSKELETAL	Illness	Immunological / Inflammatory	Ankylosing spondylitis	MS	4	74	MS.04.74	RM.05.51	720		M45	L88	Illness
27	MUSCULOSKELETAL	Illness	Infection	Fibular osteomyelitis	MS	4	75	MS.04.75	LE.33.39	823.2		M86.9	L70	Illness
27	MUSCULOSKELETAL	Illness	Metabolic / nutritional	McArdle's Syndrome	MS	4	77	MS.04.77	RM.04.51	716.8		E74.0	T99	Illness
27	MUSCULOSKELETAL	Illness	Multiple	Sjogren's Syndrome	MS	4	82	MS.04.82	RM.05.59	710.2		M35.0	L99	Illness
27	MUSCULOSKELETAL	Illness	Immunological / Inflammatory	Reiter's Syndrome	MS	5	74	MS.05.74	RM.05.52	714.8		M02.3	L99	Illness
27	MUSCULOSKELETAL	Illness	Infection	Joint sepsis	MS	5	75	MS.05.75	EL.40.38	841.8	FA1	A41.9	A78	Illness
27	MUSCULOSKELETAL	Illness	Immunological / Inflammatory	Other Seronegative Spondarthropathies	MS	6	74	MS.06.74	RM.05.54	710.8		M06.0	L88	Illness
27	MUSCULOSKELETAL	Illness	Infection	Septic bursitis	MS	6	75	MS.06.75	EL.61.38	841.8	NC36.7	S53.4	L79	Illness
27	MUSCULOSKELETAL	Illness	Immunological / Inflammatory	Rheumatoid Arthritis	MS	7	74	MS.07.74	RM.05.55	714	FA20	M06.9	L88	Illness
27	MUSCULOSKELETAL	Illness	Infection	Palm infection	MS	7	75	MS.07.75	HA.90.38	842.1		A49.9	A78	Illness
27	MUSCULOSKELETAL	Illness	Immunological / Inflammatory	Lupus	MS	8	74	MS.08.74	RM.05.56	695.4		L93.0	S99	Illness
27	MUSCULOSKELETAL	Illness	Infection	Upper extremity stump iinfection	MS	8	75	MS.08.75	NE85.4	54				Illness
27	MUSCULOSKELETAL	Illness	Immunological / Inflammatory	Myositis	MS	9	74	MS.09.74	RM.07.51	729		M60.9	L18	Illness
27	MUSCULOSKELETAL	Illness	Infection	Lower extremity stump iinfection	MS	9	75	MS.09.75	NE85.4	54				Illness
28	NEUROLOGICAL	Illness	Neoplasm	Neurologic Neoplasm	NS	0	76	NS.00.76	NS.00.42	195		D36.1	N75	Illness
28	NEUROLOGICAL	Illness	Unknown or not specified	Other nervous system illness / disorder	NS	0	83	NS.00.83	NS.00.00	349.9		D36.1	N75	Illness
28	NEUROLOGICAL	Illness	Immunological / Inflammatory	Idiopathic brachial neuritis	NS	1	74	NS.01.74	NS.24.51	955.7		M54.1	L99	Illness
28	NEUROLOGICAL	Illness	Infection	Meningitis	NS	1	75	NS.01.75	NS.23.38	322.9		G00.9	N71	Illness
28	NEUROLOGICAL	Illness	Thrombotic / hemorrhagic	Stroke	NS	1	78	NS.01.78	NS.22.52	349.8		I64	K90	Illness
28	NEUROLOGICAL	Illness	Unknown or not specified	Peripheral neuropathy	NS	1	83	NS.01.83	NS.01.51	349.8		G62.9	N94	Illness
28	NEUROLOGICAL	Illness	Infection	Herpes Zoster / Shingles	NS	2	75	NS.02.75	TR.21.51	956.5		B02.9	S70	Illness
28	NEUROLOGICAL	Illness	Unknown or not specified	Multiple sclerosis	NS	2	83	NS.02.83	NS.01.54	349.8		G35	N86	Illness
28	NEUROLOGICAL	Illness	Unknown or not specified	Headache	NS	3	83	NS.03.83	NS.01.52	784		R51	N01	Illness
28	NEUROLOGICAL	Illness	Unknown or not specified	Migraine	NS	5	83	NS.05.83	NS.01.53	346		G43.9	N89	Illness
28	NEUROLOGICAL	Illness	Unknown or not specified	Convulsive disorder / epilepsy	NS	6	83	NS.06.83	NS.01.55	345		G40.9	N88	Illness
28	NEUROLOGICAL	Illness	Unknown or not specified	Vertigo / Menier's disease	NS	7	83	NS.07.83	NS.01.56	780.4		H81.0	H82	Illness
28	NEUROLOGICAL	Illness	Unknown or not specified	Polyneuritis / Guillan-Barre Syndrome	NS	8	83	NS.08.83	NS.01.57	349.8		G61.0	N94	Illness
28	NEUROLOGICAL	Illness	Unknown or not specified	Post-polio Syndrome	NS	9	83	NS.09.83	NS.01.58	349.8		G14	N70	Illness
29	OPTHALMOLOGICAL	Illness	Infection	Stye	OP	1	75	OP.01.75	HE.03.53	374.8		H00.0	F72	Illness
29	OPTHALMOLOGICAL	Illness	Infection	Conjunctivitis	OP	2	75	OP.02.75	HE.03.54	372		H10.9	F70	Illness
30	OTOLOGICAL	Illness	Infection	Otitis media	OT	1	75	OT.01.75	HE.04.38	382.9		H66.9	H71	Illness
30	OTOLOGICAL	Illness	Unknown or not specified	Dizziness/ Vertigo	OT	1	83	OT.01.83	HE.04.55	384.8		R42	N17	Illness
30	OTOLOGICAL	Illness	Infection	Otitis externa = swimmer's ear	OT	2	75	OT.02.75	HE.04.51	380.2		H60.9	H70	Illness
30	OTOLOGICAL	Illness	Unknown or not specified	Labyrinthitis	OT	2	83	OT.02.83	HE.04.56	379.5		H83.0	H82	Illness
31	PSYCHIATRIC / PSYCHOLOGICAL	Illness	Unknown or not specified	Other psychiatric illness / disorder	PS	0	83	PS.00.83	PS.00.00	349.9		F32.9	P76	Illness
31	PSYCHIATRIC / PSYCHOLOGICAL	Illness	Metabolic / nutritional	Anorexia nervosa / bulemia	PS	1	77	PS.01.77	PS.00.53	783.9	MG43.7	F50.0	P86	Illness
31	PSYCHIATRIC / PSYCHOLOGICAL	Illness	Developmental	Attention deficit hyperactivity disorder	PS	1	80	PS.01.80	PS.00.55	314		F90.9	P81	Illness
31	PSYCHIATRIC / PSYCHOLOGICAL	Illness	Unknown or not specified	Depression /bipolar disorder	PS	1	83	PS.01.83	PS.00.51	349.8	MB24.5	F32.9	P76	Illness
31	PSYCHIATRIC / PSYCHOLOGICAL	Illness	Unknown or not specified	Anxiety	PS	2	83	PS.02.83	PS.00.52	300.9	MB24.3	F41.9	P74	Illness
31	PSYCHIATRIC / PSYCHOLOGICAL	Illness	Unknown or not specified	Insomnia, jet lag and sleep disturbance	PS	3	83	PS.03.83	PS.00.54	349.8		G47.0	P06	Illness
31	PSYCHIATRIC / PSYCHOLOGICAL	Illness	Unknown or not specified	Overtraining syndrome	PS	4	83	PS.04.83	PS.01.51	780.7		Z73.0	P29	Illness
31	PSYCHIATRIC / PSYCHOLOGICAL	Illness	Unknown or not specified	Burn-out, fatigue syndrome	PS	5	83	PS.05.83	PS.02.52	780.7		Z73.0	P29	Illness
31	PSYCHIATRIC / PSYCHOLOGICAL	Illness	Unknown or not specified	Sexual assault	PS	6	83	PS.06.83	PS.02.52	780.7		Z73.0	P29	Illness
32	RESPIRATORY	Illness	Unknown or not specified	Other respiratory illness / disorder	RE	0	83	RE.00.83	RE.00.00	519.9		J98.9	R99	Illness
32	RESPIRATORY	Illness	Allergic	Hayfever	RE	1	71	RE.01.71	RE.05.53	995.3		J30.1	R97	Illness
32	RESPIRATORY	Illness	Immunological / Inflammatory	Exercise Induced Asthma (EIA/EIB)	RE	1	74	RE.01.74	RE.05.51	493.9		J45.1	R96	Illness
32	RESPIRATORY	Illness	Infection	Upper Respiratory Tract Infection - Viral	RE	1	75	RE.01.75	RE.01.38	465.9		J06.9	R74	Illness
32	RESPIRATORY	Illness	Neoplasm	Respiratory neoplasm	RE	1	76	RE.01.76	RE.00.42	162		D38.6	R92	Illness
32	RESPIRATORY	Illness	Unknown or not specified	Pneumothorax - Spontaneous	RE	1	83	RE.01.83	RE.06.52	512	NB32.0	J93.1	R99	Illness
32	RESPIRATORY	Illness	Immunological / Inflammatory	Asthma	RE	2	74	RE.02.74	RE.05.52	493.1		J45.9	R96	Illness
32	RESPIRATORY	Illness	Infection	Tonsilitis	RE	2	75	RE.02.75	RE.02.38	463		J03.9	R76	Illness
32	RESPIRATORY	Illness	Unknown or not specified	Cystic fibrosis	RE	2	83	RE.02.83	RE.06.53	786.9		E84.9	T99	Illness
32	RESPIRATORY	Illness	Infection	Quinsy (Peritonsillar Abscess)	RE	3	75	RE.03.75	RE.03.38	786.9		J36	R76	Illness
32	RESPIRATORY	Illness	Unknown or not specified	COPD- Chronic Obstrucitve Pulmonary Disease	RE	3	83	RE.03.83	RE.06.54	786.9		J44.9	R95	Illness
32	RESPIRATORY	Illness	Infection	Pharyngitis	RE	4	75	RE.04.75	RE.04.38	462		J02.9	R74	Illness
32	RESPIRATORY	Illness	Unknown or not specified	Chronic rhinitis	RE	4	83	RE.04.83	HE.05.53	784.9		J31.0	R83	Illness
32	RESPIRATORY	Illness	Infection	Bronchitis / lower respiratory tract infection	RE	5	75	RE.05.75	RE.05.38	490		J40	R78	Illness
32	RESPIRATORY	Illness	Infection	Pneumonia	RE	6	75	RE.06.75	RE.06.55	481		J18.9	R81	Illness
32	RESPIRATORY	Illness	Infection	Sinusitis	RE	7	75	RE.07.75	RE.05.52	473.9			R75	Illness
33	THERMOREGULATORY	Illness	Environmental - exercise related	Hypothermia	TR	1	72	TR.01.72	EV.01.51	995.8	NF02	T68	A88	Illness
33	THERMOREGULATORY	Illness	Environmental - exercise related	Hyperthermia / Heat illness (exhaustion, syncope, stroke)	TR	2	72	TR.02.72	EV.01.53	995.8	NF01	T67.0	A03	Illness
33	THERMOREGULATORY	Illness	Environmental - exercise related	Heat cramps	TR	3	72	TR.03.72	EV.01.54	995.8	NF01	T67.2	A88	Illness
34	MULTIPLE OR NOS	Illness	Environmental - non exercise	Other environmental illness / disorder	MO	0	73	MO.00.73	EV.00.00	995.8		T67.8	A88	Illness
34	MULTIPLE OR NOS	Illness	Infection	Other infectious illness / disorder	MO	0	75	MO.00.75	ID.00.00	136.8		B99	A78	Illness
34	MULTIPLE OR NOS	Illness	Metabolic / nutritional	Other fluid and electrolyte illness / disorder	MO	0	77	MO.00.77	FE.00.00	796.9		E87.8	T99	Illness
34	MULTIPLE OR NOS	Illness	Environmental - exercise related	Altitude / mountain sickness	MO	1	72	MO.01.72	EV.02.51	995.8		T70.2	A88	Illness
34	MULTIPLE OR NOS	Illness	Environmental - non exercise	Frostbite	MO	1	73	MO.01.73	EV.01.52	995.8		T69.8	A88	Illness
34	MULTIPLE OR NOS	Illness	Infection	Non-specific viral Illness	MO	1	75	MO.01.75	ID.01.51	491.9		B99	A78	Illness
34	MULTIPLE OR NOS	Illness	Environmental - exercise related	High Altitude Pulmonary or Cerebral Edema	MO	2	72	MO.02.72	EV.02.52	959		T70.2	R99	Illness
34	MULTIPLE OR NOS	Illness	Environmental - non exercise	Sunburn	MO	2	73	MO.02.73	EV.01.55	995.8		T55	A86	Illness
34	MULTIPLE OR NOS	Illness	Infection	Influenza	MO	2	75	MO.02.75	ID.01.52	487.1		J11.1	R80	Illness
34	MULTIPLE OR NOS	Illness	Environmental - exercise related	Nitrogen narcosis	MO	3	72	MO.03.72	EV.03.51	995.8		T70.3	A88	Illness
34	MULTIPLE OR NOS	Illness	Infection	Mononucleosis (EBV) / CMV	MO	3	75	MO.03.75	ID.01.53	136.8		B27.9	A75	Illness
34	MULTIPLE OR NOS	Illness	Environmental - exercise related	Decompression sickness	MO	4	72	MO.04.72	EV.03.52	995.8		T70.3	A88	Illness
34	MULTIPLE OR NOS	Illness	Environmental - non exercise	Diving reflex / sudden death	MO	4	73	MO.04.73	EV.03.54	995.8		R99	A96	Illness
34	MULTIPLE OR NOS	Illness	Infection	Shingles (herpes zoster) - non trunk	MO	4	75	MO.04.75	ID.01.54	53.9		B02.9	S70	Illness
34	MULTIPLE OR NOS	Illness	Environmental - exercise related	Hyponatremia	MO	5	72	MO.05.72	FE.01.51	796.9		E87.1	T99	Illness
34	MULTIPLE OR NOS	Illness	Infection	Lymphadenitis / lymphangitis	MO	5	75	MO.05.75	ID.01.55	136.9		I89.1	B99	Illness
34	MULTIPLE OR NOS	Illness	Environmental - exercise related	Hypernatremia	MO	6	72	MO.06.72	FE.01.52	796.9		E87.0	T99	Illness
34	MULTIPLE OR NOS	Illness	Infection	Post Viral Fatigue	MO	6	75	MO.06.75	ID.01.56	780.7		G93.3	A04	Illness
34	MULTIPLE OR NOS	Illness	Environmental - exercise related	Dehydration	MO	7	72	MO.07.72	FE.01.53	796.9	NF06.2	E86	T11	Illness
34	MULTIPLE OR NOS	Illness	Infection	Varicella	MO	7	75	MO.07.75	ID.01.57	52.9		G93.3	A04	Illness
34	MULTIPLE OR NOS	Illness	Infection	HIV related	MO	8	75	MO.08.75	ID.02.51	42		B24	B90	Illness
35	UNKNOWN OR NOT SPECIFIED	Illness	Neoplasm	Head neoplasm	UO	91	76	UO.91.76	HE.00.42	195		C76.0	A79	Illness
35	UNKNOWN OR NOT SPECIFIED	Illness	Neoplasm	Neck Neoplasm	UO	92	76	UO.92.76	NE.00.42	195		D48.9	A99	Illness
35	UNKNOWN OR NOT SPECIFIED	Illness	Neoplasm	Upper extremity neoplasm	UO	93	76	UO.93.76	SH.00.42	840.9		D48.9	A99	Illness
35	UNKNOWN OR NOT SPECIFIED	Illness	Neoplasm	Lower extremity neoplasm	UO	94	76	UO.94.76	AR.00.42	840.8		D48.9	A99	Illness
35	UNKNOWN OR NOT SPECIFIED	Illness	Neoplasm	Thoracic neoplasm	UO	95	76	UO.95.76	TR.00.42	847.1		D48.9	A99	Illness
35	UNKNOWN OR NOT SPECIFIED	Illness	Neoplasm	Abdominal Neoplasm	UO	96	76	UO.96.76	AB.00.42	159		D48.9	A99	Illness
35	UNKNOWN OR NOT SPECIFIED	Illness	Neoplasm	Lumbar neoplasm	UO	97	76	UO.97.76	LP.00.42	847.2		D48.9	A99	Illness

## Sheet: Coding Key
									CALGARY SPORT MEDICINE DIAGNOSTIC CODING SYSTEM KEY:
		XX.00.00
		â	â	â
		â	â	Pathology type, where:		.00 to .50 = injury type across all tissues
		â	â			.70 to .99 = illness etiology
		â	â			.51 to .69 are reserved for future use			.00 Non-specific Injury
		â	â						Trauma			Inflammatory	Other	Illness Etiology
		â	Tissue code						.01 1° sprain -acute	.10 dislocation	.19 fracture-greenstick	.28 tendonitis/ tendinopathy	.35 avascular necrosis	.71 Allergic
		â	Where:	.00.00 = illness/non-MSK					.02 2° sprain -acute	.11 subluxation	.20 physis injury / apophysitis	.29 tenosynovitis	.36 exertional compartment syndrome	.72 Environmental – exercise-related
		â		.10.00 = muscle (including tendon)					.03 3° sprain -acute	.12 instability	.21 chondral / meniscal injury	.30 synovitis / capsultis	.37 osteochondritis (dissecans)	.73 Environmental – non exercise
		â		.20.00 = nervous					.04 1° sprain -chronic	.13 fracture- acute	.22 effusion	.31 bursitis	.38 hypomobility	.74 Immunological / Inflammatory
		â		.30.00 = bone (.31 = vertebrae)					.05 2° sprain -chronic	.14 fracture- avulsion	.23 swelling	.32 periostitis	.39 nerve injury	.75 Infection
		â		.40.00 = joint (including cartilage, synovium, bursa)					.06 3° sprain -chronic	.15 fracture- non-union	.24 contusion	.33 inflammation	.40 brain or spinal cord injury	.76 Neoplasm
		â		.50.00 = ligament (including capsule)					.07 strain	.16 fracture+dislocation	.25 laceration	.34 post traumatic osteoarthritis	.41 neuroma	.77 Metabolic / nutritional
		â		.60.00 = superficial tissues, skin					.08 spasm	.17 fracture-osteochondral	.26 abrasion		.42 misc. pain condition	.78 Thrombotic / Haemorrhagic
		â		.70.00 = vessels					.09 tear/rupture	.18 stress fracture	.27 blister		.43 CPRS (RSD)	.79 Degenerative or chronic
		â		.80.00 = internal organs									.44 stump injury	.80 Developmental
		â		.90.00 = non-specific (.91 = stump)									.45 vessel injury	.81 Drug-related / poisoning
		â											.46 organ trauma	.82 Multiple
	Region code											2		.83 Unknown or not specified
	Trauma region is:				System or Illness "Region"
	1	HE = head			20	CV = cardiovascular
	2	NE = neck			21	DE = dermatological
	3	SH = shoulder			22	DT = dental
	4	AR = upper arm			23	EN = endocrinological
	5	EL = elbow			24	GI = gastrointestinal
	6	FA = forearm			25	GU = genitourinary
	7	WR = wrist			26	BL = haematologic
	8	HA = hand			27	MS = musculoskeletal
	9	CH = chest			28	NS = neurological
	10	TS = thoracic spine			29	OP = opthamological
	11	AB = abdomen			30	OT = otological
	12	LS = lumbosacral spine			31	PS = psychiatric/pyschological
	13	HI = hip / groin			32	RE = respiritory
	14	TH = thigh			33	TR = thermoregulatory
	15	KN = knee			34	MO = multiple systems
	16	LE = lower leg			35	UO - unknown or not specifed
	17	AN = ankle
	18	FO = foot
	19	OO = non specific injury

## Sheet: Explanatory Note
	Calgary Sport Medicine Diagnostic Coding System (SMDCS)
	EXPLANATORY NOTE
	Please feel free to use this a copy of the UofC Sport Medicine Diagnotic Coding System (SMDCS). It is designed to be flexible, permit easy retrieval, and may be easily expanded. We only ask that you reference this system appropriately in any publications.
	It follows a systematic anatomical design, first listing the area (00.), then structure(.00.), and then the type of injury(.00). Ideally, a system using this should be set up to enter more than one diagnostic code to allow accurate entry of combination injuries, such as ACL/MCL/Medial meniscus tears.
	The basic design permits easy retrieval of data. Any area, structure or injury type may be used for sorting or data extraction. The first digit of the structure code (00.00.00) is standardized to permit one to analyze the injuries by muscle, ligament, bone, etc. regardless of the area of the body.
	Since the last two digits (00.00.00) are also standardized (see "common diagnostic codes"), injuries/illnesses of that type can be scanned without the need to search each region of the body separately.
	Numbers .00 to .50 are injury codes while .70 to .99 are illness codes ommon acrosss all tissue types / systems. Codes .51-.69 are unique reserved for future use.
	Future modifications or additions to the system will be coordinated through a set of master records to retain a consistent list of diagnostic codes over time.
	WHM

## Sheet: IOC Consensus Categories
Table # Recommended categories of body regions and areas for injuries.
Region	Body area	SMDCS	Notes
Head and neck	Head	HE	Includes facial, brain (concussion), eyes, ears, teeth
	Neck	NE	Cervical spine, throat
Upper limb	Shoulder	SH	Includes clavicle, scapula, rotator cuff, biceps tendon origin
	Upper arm	AR
	Elbow	EL	Ligaments, insertional biceps and triceps tendon
	Forearm	FA	Includes non-articular radius & ulna injuries
	Wrist	WR	Carpus
	Hand	HA	Includes finger, thumb
Trunk	Chest	CH	Sternum, ribs, chest organs
	Thoracic spine	TS	Thoracic spine, costovertebral joints
	Lumbosacral	LS	Includes lumbar spine, sacroiliac joints, sacrum, coccyx, buttock
	Abdomen	AB	Below diaphragm and above inguinal canal, includes abdominal organs
Lower limb	Hip/groin	HI	Hip and anterior musculoskeletal structures (e.g. pubic symphysis, proximal adductors, iliopsoas)27
	Thigh	TH	Includes femur, hamstrings (including ischial tuberosity), quadriceps, mid-distal adductors
	Knee	KN	Includes patella, patellar tendon, pes anserinus
	Lower leg	LE	Includes non-articular tibia & fibular injuries, calf and Achilles tendon
	Ankle	AN	Includes syndesmosis, talocrural and subtalar joints
	Foot	FO	Includes toes, calcaneus, plantar fascia
Unspecified	Region unspecified	OO
Multiple regions	Single injury crossing two or more regions	OO
Table # Recommended categories of tissue and pathology types for injuries.
Tissue	Pathology type	Tissue SMDCS	Notes
Muscle/tendon	Muscle injury	10.07-10.09	Includes strain, tear, rupture, intramuscular tendon
	Muscle contusion	10.24
	Muscle compartment syndrome	10.36
	Tendinopathy	10.28-10.29	Includes paratenon, related bursa, fasciopathy, partial tear, tendon subluxation (all non-rupture), enthesopathy
	Tendon rupture	10.09	Complete/full thickness injury; Partial tendon injuries considered to be tendinopathy
Nervous	Brain & spinal cord injury	20.4	Includes concussion and all forms of brain injury, and spinal cord
	Peripheral nerve Injury	20.39, 20.41-20.42	Includes neuroma
Bone	Fracture	30.13-30.16, 30.19	Traumatic, includes avulsion fracture, teeth
	Bone stress injury	30.18, 30.32	Includes bone marrow edema, stress fracture, periostitis
	Bone contusion	30.24	Acute bony traumatic injury without fracture. Osteochondral injuries are considered ‘Joint cartilage’
	Avascular necrosis	30.35
	Physis injury	30.2	Includes apophysis
Cartilage/synovium/bursa	Cartilage	40.17, 40.21, 40.37	Includes meniscal, labral injuries and articular cartilage, osteochondral injuries
	Arthritis	40.33-40.34	Post traumatic osteoarthritis
	Synovitis / capsulitis	40.22, 40.34	Includes joint impingement
	Bursitis	40.31	Includes calcific bursitis, traumatic bursitis
Ligament/joint capsule	Joint sprain (ligament tear or acute instability episode)	50.01-50.11	Includes partial and complete tears plus injuries to non-specific ligaments and joint capsule; includes joint dislocations / subluxations
	Chronic instability	50.12
Superficial tissues/skin	Contusion (superficial)	60.24	Contusion, bruise, vascular damage
	Laceration	60.25
	Abrasion	60.26-60.27
Vessels	Vascular trauma	70.45
Stump	Stump injury	91.44	In amputees
Internal organs	Organ trauma	80.46	Includes trauma to any organ (excluding concussion), drowning, relevant for all specialized organs not mentioned elsewhere (lungs, abdominal and pelvic organs, thyroid, breast)
Non-specific	Injury without tissue type specified	0.0, 0.23, 0.38, 0.42	No specific tissue pathology diagnosed
Table # Recommended categories of organ system/region for illnesses.
Organ system/Region	ICD-11	SMDC	Notes
Cardiovascular	11	CV
Dermatological	14	DE
Dental	-13	DT
Endocrinological	5	EN
Gastrointestinal	-13	GI
Genitourinary	16	GU	Includes renal, obstetrical, gynecological
Hematologic	3	BL
Musculoskeletal	15	MS	Includes rheumatological conditions
Neurological	8	NS
Opthalmological	9	OP
Otological	10	OT	Ear only
Psychiatric/psychological	6	PS
Respiratory	12	RE	Includes nose and throat
Thermoregulatory	-22	TR
Multiple systems		MO
Unknown or not specified		UO
Table # Recommended categories for etiology of illnesses.
Etiology	ICD-11	SMDC	Notes
Allergic	-22	71
Environmental–exercise-related	-23	72	Heat illness, hypothermia, hyponatraemia, dehydration
Environmental – non-exercise	(22/7)	73	Includes sleep/wake, sunburn
Immunological/inflammatory	-4	74
Infection	1	75	Viral, bacterial, parasitic
Neoplasm	2	76
Metabolic/nutritional	5	77
Thrombotic/haemorrhagic	(11/03)	78
Degenerative or chronic condition	-	79	Chronic acquired conditions
Developmental anomaly	20	80	Includes congenital conditions
Drug-related/poisoning	22	81	Includes pharma, illicit
Multiple		82
Unknown, or not specified		83

## Sheet: ICD11 sports codes to SMDCS2
ICD11_Code	ICD11_Title	ICD11_ChapterNo	SMDCS Region	SMDCS Structure	SMDCS Diagnosis	SMDCS 2 Code
0	Diseases of the musculoskeletal system or connective tissue	15	OO
0	- Arthropathies	15	OO	40	34	OO.40.34
0	- - Osteoarthritis	15	OO	40	34	OO.40.34
FA00	- - - Osteoarthritis of hip	15	HI	40	34
FA00.0	- - - - Primary osteoarthritis of hip	15	HI	40	34	HI.40.34
FA00.1	- - - - Post traumatic osteoarthritis of hip	15	HI	40	34	HI.40.34
FA00.2	- - - - Other secondary osteoarthritis of hip	15	HI	40	34	HI.40.34
FA00.Z	- - - - Osteoarthritis of hip, unspecified	15	HI	40	34	HI.40.34
FA01	- - - Osteoarthritis of knee	15	KN	40	34
FA01.0	- - - - Primary osteoarthritis of knee	15	KN	40	34	KN.40.34
FA01.1	- - - - Post traumatic osteoarthritis of knee	15	KN	40	34	KN.40.34
FA01.2	- - - - Other secondary osteoarthritis of knee	15	KN	40	34	KN.40.34
FA01.Z	- - - - Osteoarthritis of knee, unspecified	15	KN	40	34	KN.40.34
FA02	- - - Osteoarthritis of wrist and hand	15	WR	40	34
FA02.0	- - - - Primary osteoarthritis of wrist and hand	15	WR/HA	40	34
FA02.1	- - - - Post traumatic osteoarthritis of wrist and hand	15	WR/HA	40	34
FA02.2	- - - - Other secondary osteoarthritis of wrist and hand	15	WR/HA	40	34
FA02.Z	- - - - Osteoarthritis of wrist and hand, unspecified	15	WR/HA	40	34
FA03	- - - Osteoarthritis of other specified joint	15	OO	40	34
FA03.0	- - - - Primary osteoarthritis of other specified joint	15	OO	40	34	OO.40.34
FA03.1	- - - - Post traumatic osteoarthritis of other specified joint	15	OO	40	34	OO.40.34
FA03.2	- - - - Other secondary osteoarthritis of other specified joint	15	OO	40	34	OO.40.34
FA03.Z	- - - - Osteoarthritis of other specified joint, unspecified	15	OO	40	34	OO.40.34
FA04	- - - Oligoosteoarthritis	15	OO	40	34	OO.40.34
FA05	- - - Polyosteoarthritis	15	OO	40	34	OO.40.34
FA0Z	- - - Osteoarthritis, unspecified	15	OO	40	34	OO.40.34
0	- - Infection related arthropathies	15	OO
FA10	- - - Direct infections of joint	15	OO
FA10.0	- - - - Bacterial infection of joint	15	OO
FA10.1	- - - - Viral infection of joint	15	OO
FA10.2	- - - - Fungal infection of joint	15	OO
FA10.Z	- - - - Direct infections of joint, unspecified	15	OO
FA11	- - - Reactive arthropathies	15	OO
FA11.0	- - - - Arthropathy following intestinal bypass	15	OO	40	34	OO.40.34
FA11.1	- - - - Arthropathy following vaccination	15	OO
FA11.2	- - - - Arthropathy following genitourinary infection	15	OO
FA11.Y	- - - - Other specified reactive arthropathies	15	OO
FA11.Z	- - - - Reactive arthropathies, unspecified	15	OO
FA12	- - - Postinfectious arthropathies	15	OO
FA12.0	- - - - Bacterial postinfectious arthropathy	15	OO
FA12.1	- - - - Viral postinfectious arthropathies	15	OO
FA12.2	- - - - Fungal postinfectious arthropathies	15	OO
FA12.3	- - - - Parasitic postinfectious arthropathies	15	OO
FA12.Y	- - - - Other specified postinfectious arthropathies	15	OO
FA12.Z	- - - - Postinfectious arthropathies, unspecified	15	OO
FA13	- - - Infectious spondyloarthritis	15	OO
FA1Y	- - - Other specified infection related arthropathies	15	OO
FA1Z	- - - Infection related arthropathies, unspecified	15	OO
0	- - Inflammatory arthropathies	15	OO
FA20	- - - Rheumatoid arthritis	15	OO	40	34
FA20.0	- - - - Seropositive rheumatoid arthritis	15	OO	40	34	OO.40.34
FA20.1	- - - - Seronegative rheumatoid arthritis	15	OO	40	34	OO.40.34
FA20.Z	- - - - Rheumatoid arthritis, serology unspecified	15	OO	40	34	OO.40.34
FA21	- - - Psoriatic arthritis	15	OO	40	34
FA21.0	- - - - Psoriatic spondyloarthritis	15	OO	40	34
FA21.Y	- - - - Other specified psoriatic arthritis	15	OO	40	34	OO.40.34
FA21.Z	- - - - Psoriatic arthritis, unspecified	15	OO	40	34	OO.40.34
FA22	- - - Polymyalgia rheumatica	15	OO	40	34
FA23	- - - Adult-onset Still disease	15	OO	40	34
FA24	- - - Juvenile idiopathic arthritis	15	OO
FA24.0	- - - - Juvenile idiopathic oligoarthritis	15	OO
FA24.00	- - - - - Juvenile idiopathic oligoarthritis, onset persistent	15	OO
FA24.01	- - - - - Juvenile idiopathic oligoarthritis, onset extended	15	OO
FA24.0Z	- - - - - Juvenile idiopathic oligoarthritis, onset unspecified	15	OO
FA24.1	- - - - Juvenile idiopathic polyarthritis	15	OO
FA24.2	- - - - Juvenile psoriatic arthritis	15	OO
FA24.3	- - - - Juvenile enthesitis related arthritis	15	OO
FA24.4	- - - - Juvenile systemic arthritis	15	OO
FA24.Y	- - - - Other specified juvenile idiopathic arthritis	15	OO
FA24.Z	- - - - Juvenile idiopathic arthritis, unspecified	15	OO
FA25	- - - Gout	15	OO
FA25.0	- - - - Primary gout	15	OO
FA25.1	- - - - Secondary gout	15	OO
FA25.10	- - - - - Lead-induced gout	15	OO
FA25.11	- - - - - Drug-induced gout	15	OO
FA25.12	- - - - - Gouty arthropathy due to enzyme defects or other inherited disorders	15	OO
FA25.1Y	- - - - - Other specified secondary gout	15	OO
FA25.1Z	- - - - - Secondary gout, unspecified	15	OO
FA25.2	- - - - Gout without specification whether primary or secondary	15	OO
FA25.20	- - - - - Tophaceous gout	15	OO
FA25.2Y	- - - - - Other specified gout without specification whether primary or secondary	15	OO
FA25.2Z	- - - - - Gout, unspecified	15	OO
FA26	- - - Certain specified crystal arthropathies	15	OO
FA26.0	- - - - Calcium pyrophosphate dehydrate deposition disease	15	OO
FA26.1	- - - - Hydroxyapatite deposition disease	15	OO
FA26.2	- - - - Chondrocalcinosis	15	OO
FA26.Y	- - - - Other specified crystal arthropathies	15	OO
FA26.Z	- - - - Crystal arthropathies, unspecified	15	OO
FA27	- - - Certain specified inflammatory arthropathies	15	OO
FA27.0	- - - - Kashin-Beck disease	15	OO
FA27.1	- - - - Pigmented villonodular synovitis	15	OO	40	30
FA27.2	- - - - Palindromic rheumatism	15	OO
FA27.3	- - - - Transient synovitis	15	OO	40	30	OO.40.30
FA27.4	- - - - Intermittent hydrarthrosis	15	OO
FA27.Y	- - - - Other specified inflammatory arthropathies	15	OO
FA27.Z	- - - - Inflammatory arthropathies, unspecified	15	OO
FA2Z	- - - Inflammatory arthropathies, unspecified	15	OO
0	- - Certain specified joint disorders or deformities of limbs	15	OO	83	83	OO.83.83
FA30	- - - Acquired deformities of fingers or toes	15	HA/FO	83	83
FA30.0	- - - - Acquired hallux valgus	15	FO	40	34
FA30.1	- - - - Hallux rigidus	15	FO	40	34	FO.40.34
FA30.2	- - - - Acquired hammer toe	15	FO	40	34	FO.40.34
FA30.Y	- - - - Other specified acquired deformities of fingers or toes	15	HA/FO	83	83
FA30.Z	- - - - Acquired deformities of fingers or toes, unspecified	15	HA/FO	83	83
FA31	- - - Other acquired deformities of limbs	15	OO	83	83	OO.83.83
FA31.0	- - - - Valgus deformity, not elsewhere classified	15	OO	83	83	OO.83.83
FA31.1	- - - - Varus deformity, not elsewhere classified	15	OO	83	83	OO.83.83
FA31.2	- - - - Flexion deformity	15	OO	83	83	OO.83.83
FA31.3	- - - - Acquired wrist drop	15	WR	20	40
FA31.4	- - - - Acquired foot drop	15	FO	20	40
FA31.5	- - - - Acquired pes planus	15	FO	83	83	FO.83.83
FA31.6	- - - - Acquired clawhand or clubhand	15	HA	40	34	HA.40.34
FA31.7	- - - - Acquired clawfoot or clubfoot	15	FO	40	34	FO.40.34
FA31.8	- - - - Acquired unequal limb length	15	OO	83	83
FA31.Y	- - - - Other specified acquired deformities of limbs	15	OO	83	83	OO.83.83
FA31.Z	- - - - Acquired deformities of limbs, unspecified	15	OO	83	83	OO.83.83
FA32	- - - Disorders of patella	15	KN	83	83	KN.83.83
FA32.0	- - - - Recurrent instability of patella	15	KN	50	0
FA32.1	- - - - Patellofemoral disorders	15	KN	83	83
FA32.Y	- - - - Other specified disorders of patella	15	KN	83	83	KN.83.83
FA32.Z	- - - - Disorders of patella, unspecified	15	KN	83	83	KN.83.83
FA33	- - - Internal derangement of knee	15	KN	83	83	KN.83.83
FA33.0	- - - - Cystic meniscus	15	KN	83	83
FA33.1	- - - - Discoid meniscus	15	KN	83	83
FA33.2	- - - - Derangement of meniscus due to old tear or injury	15	KN	83	83	KN.83.83
FA33.3	- - - - Loose body in knee	15	KN	83	83
FA33.4	- - - - Chronic instability of knee	15	KN	50	0
FA33.40	- - - - - Chronic instability of knee, medial collateral ligament or other and unspecified medial meniscus	15	KN	83	83	KN.83.83
FA33.4Y	- - - - - Other specified chronic instability of knee	15	KN	83	83	KN.83.83
FA33.4Z	- - - - - Chronic instability of knee, unspecified	15	KN	83	83	KN.83.83
FA33.Y	- - - - Other specified internal derangement of knee	15	KN	83	83	KN.83.83
FA33.Z	- - - - Internal derangement of knee, unspecified	15	KN	83	83	KN.83.83
FA34	- - - Certain specified joint derangements	15	KN	83	83	KN.83.83
FA34.0	- - - - Loose body in joint	15	OO	83	83
FA34.1	- - - - Disorder of ligament	15	OO
FA34.2	- - - - Recurrent instability of joint	15	OO	50	0	OO.50.0
FA34.3	- - - - Contracture of joint	15	OO	83	83	OO.83.83
FA34.4	- - - - Ankylosis of joint	15	OO	83	83	OO.83.83
FA34.5	- - - - Impingement syndrome of hip	15	OO	83	83	OO.83.83
FA34.Y	- - - - Other joint derangements	15	OO	83	83	OO.83.83
FA35	- - - Wear of articular bearing surface of joint prosthesis	15	OO
FA35.0	- - - - Wear of articular bearing surface of joint prosthesis of hip	15	HI
FA35.1	- - - - Wear of articular bearing surface of joint prosthesis of knee	15	KN	83	83
FA35.2	- - - - Wear of articular bearing surface of joint prosthesis of other joint	15	OO
FA35.Z	- - - - Wear of articular bearing surface of joint prosthesis of unspecified joint	15	OO
FA36	- - - Effusion of joint	15	OO	83	83
FA36.0	- - - - Effusion of joint containing blood	15	OO	83	83	OO.83.83
FA36.Y	- - - - Other specified effusion of joint	15	OO	83	83	OO.83.83
FA36.Z	- - - - Effusion of joint, unspecified	15	OO	83	83	OO.83.83
FA37	- - - Certain joint disorders, not elsewhere classified	15	OO	83	83	OO.83.83
FA37.0	- - - - Osteophyte	15	OO	83	83	OO.83.83
FA37.Y	- - - - Other specified certain joint disorders, not elsewhere classified	15	OO	83	83	OO.83.83
FA37.Z	- - - - Certain joint disorders, not elsewhere classified, unspecified	15	OO	83	83	OO.83.83
FA38	- - - Arthropathy in diseases classified elsewhere	15	OO	40	34	OO.40.34
FA38.0	- - - - Diabetic arthropathy	15	OO	40	34	OO.40.34
FA38.1	- - - - Neuropathic arthropathy	15	OO	40	34	OO.40.34
FA38.10	- - - - - Diabetic Charcot arthropathy	15	OO	40	34	OO.40.34
FA38.1Y	- - - - - Other specified neuropathic arthropathy	15	OO	40	34	OO.40.34
FA38.1Z	- - - - - Neuropathic arthropathy, unspecified	15	OO	40	34	OO.40.34
FA38.2	- - - - Arthropathy in hypersensitivity reactions classified elsewhere	15	OO	40	34	OO.40.34
FA38.3	- - - - Haemophilic arthropathy	15	OO	40	34	OO.40.34
FA38.Y	- - - - Other specified arthropathy in diseases classified elsewhere	15	OO	40	34	OO.40.34
FA38.Z	- - - - Unspecified arthropathy in diseases classifed elsewhere	15	OO	40	34	OO.40.34
FA3Z	- - - Unspecified joint disorders and deformities of limbs	15	OO	40	34	OO.40.34
FA5Y	- - Other specified arthropathies	15	OO	40	34	OO.40.34
FA5Z	- - Arthropathies, unspecified	15	OO	40	34	OO.40.34
0	- Conditions associated with the spine	15	NE/TS/LS	83	83
0	- - Structural disorders of spine	15	NE/TS/LS	83	83
FA70	- - - Spinal deformities	15	NE/TS/LS	83	83
FA70.0	- - - - Kyphosis	15	TS
FA70.1	- - - - Scoliosis	15
FA70.2	- - - - Lordosis	15	LS	83	83
FA70.Z	- - - - Spinal deformities, unspecified	15	NE/TS/LS	83	83
FA71	- - - Torticollis	15	NE	83	83	NE.83.83
FA72	- - - Disorders of vertebra	15	NE/TS/LS	83	83
FA72.0	- - - - Ankylosing hyperostosis	15	NE/TS/LS	83	83
FA72.1	- - - - Kissing spine	15	NE/TS/LS	83	83
FA72.2	- - - - Traumatic spondylopathy	15	NE/TS/LS	83	83
FA72.3	- - - - Fatigue fracture of vertebra	15	NE/TS/LS	30	18
FA72.4	- - - - Collapsed vertebra, not elsewhere classified	15	NE/TS/LS	83	83
FA72.Y	- - - - Other specified disorders of vertebra	15	NE/TS/LS	83	83
FA7Y	- - - Other specified structural disorders of spine	15	NE/TS/LS	83	83
FA7Z	- - - Structural disorders of spine, unspecified	15	NE/TS/LS	83	83
0	- - Degenerative condition of spine	15
FA80	- - - Intervertebral disc degeneration	15
FA80.0	- - - - Intervertebral disc degeneration of cervical spine without prolapsed disc	15	NE	40	21
FA80.1	- - - - Intervertebral disc degeneration of cervical spine with prolapsed disc	15	NE	40	21
FA80.2	- - - - Intervertebral disc degeneration of cervical spine with bony spur at the vertebra	15	NE	40	21
FA80.3	- - - - Intervertebral disc degeneration of cervical spine with nervous system involvement	15	NE	20	40
FA80.4	- - - - Intervertebral disc degeneration of thoracic spine without prolapsed disc	15	TS
FA80.5	- - - - Intervertebral disc degeneration of thoracic spine with prolapsed disc	15	TS	40	21
FA80.6	- - - - Intervertebral disc degeneration of thoracic spine with bony spur at the vertebra	15	TS
FA80.7	- - - - Intervertebral disc degeneration of thoracic spine with nervous system involvement	15	TS
FA80.8	- - - - Intervertebral disc degeneration of lumbar spine without prolapsed disc	15	LS	40	21
FA80.9	- - - - Intervertebral disc degeneration of lumbar spine with prolapsed disc	15	LS	40	21
FA80.A	- - - - Intervertebral disc degeneration of lumbar spine with bony spur at the vertebra	15	LS	40	21
FA80.B	- - - - Intervertebral disc degeneration of lumbar spine with nervous system involvement	15	LS	40	21
FA80.Y	- - - - Other specified intervertebral disc degeneration	15
FA80.Z	- - - - Intervertebral disc degeneration, unspecified	15
FA81	- - - Spondylolysis	15	LS	30	18
FA81.0	- - - - Spondylolysis with slippage	15	LS	30	18
FA81.1	- - - - Spondylolysis without slippage	15	LS	30	18
FA81.Z	- - - - Spondylolysis, unspecified	15	LS	30	18
FA82	- - - Spinal stenosis	15	NE/TS/LS	83	83
FA83	- - - Ossification of spinal ligaments	15	NE/TS/LS	83	83
FA84	- - - Spondylolisthesis	15	LS	50	0
FA84.0	- - - - Spondylolisthesis with pars defect	15	LS	50	0
FA84.1	- - - - Spondylolisthesis without pars defect	15	LS	50	0
FA84.Z	- - - - Spondylolisthesis, unspecified	15	LS	50	0
FA85	- - - Spinal endplate defects	15	NE/TS/LS	30	20
FA85.0	- - - - Spinal epiphysiopathy with no determinant	15	NE/TS/LS	30	20
FA85.1	- - - - Spinal epiphysiopathy with determinants	15	NE/TS/LS	30	20
FA85.10	- - - - - Localised central endplate defect	15	NE/TS/LS	30	20
FA85.11	- - - - - Multiple anterior endplate defect	15	NE/TS/LS	30	20
FA85.12	- - - - - Separation of ring apophysis	15	NE/TS/LS	30	20
FA85.1Y	- - - - - Other specified spinal epiphysiopathy with determinants	15	NE/TS/LS	30	20
FA85.1Z	- - - - - Spinal epiphysiopathy with determinants, unspecified	15	NE/TS/LS	30	20
FA85.Y	- - - - Other specified spinal endplate defects	15	NE/TS/LS	30	20
FA85.Z	- - - - Spinal endplate defects, unspecified	15	NE/TS/LS	30	20
FA8Y	- - - Other specified degenerative condition of spine	15
FA8Z	- - - Degenerative condition of spine, unspecified	15
0	- - Inflammation of spine	15
FA90	- - - Infection of vertebra	15
FA90.0	- - - - Infection of vertebra with no determinant	15
FA90.1	- - - - Infection of vertebra with determinants	15
FA90.Y	- - - - Other specified infection of vertebra	15
FA90.Z	- - - - Infection of vertebra, unspecified	15
FA91	- - - Infection of intervertebral disc	15
FA92	- - - Inflammatory spondyloarthritis	15
FA92.0	- - - - Axial spondyloarthritis	15	NE/TS/LS	40	34
FA92.00	- - - - - Spinal enthesitis	15	NE/TS/LS	83	83
FA92.01	- - - - - Sacroiliitis, not elsewhere classified	15	LS	83	83
FA92.0Y	- - - - - Other specified axial spondyloarthritis	15	NE/TS/LS	83	83
FA92.0Z	- - - - - Axial spondyloarthritis, unspecified	15	NE/TS/LS	83	83
FA92.1	- - - - Peripheral spondyloarthritis	15	NE/TS/LS	83	83
FA92.Y	- - - - Other specified inflammatory spondyloarthritis	15
FA92.Z	- - - - Inflammatory spondyloarthritis, unspecified	15
FA9Y	- - - Other specified inflammation of spine	15
FA9Z	- - - Inflammation of spine, unspecified	15
0	- - Spondylopathies	15	NE/TS/LS	83	83
FB00	- - - Ankylosis of spinal joint	15	NE/TS/LS	83	83
FB0Y	- - - Other specified spondylopathies	15	NE/TS/LS	83	83
FB0Z	- - - Spondylopathies, unspecified	15	NE/TS/LS	83	83
FB10	- - Spinal instabilities	15	NE/TS/LS	83	83
FB1Y	- - Other specified conditions associated with the spine	15	NE/TS/LS	83	83
FB1Z	- - Conditions associated with the spine, unspecified	15	NE/TS/LS	83	83
0	- Soft tissue disorders	15	OO	83	83	OO.83.83
0	- - Disorders of muscles	15	OO	83	83	OO.83.83
FB30	- - - Infectious myositis	15	OO
FB31	- - - Calcification or ossification of muscle	15	OO	83	83
FB31.0	- - - - Progressive osseous heteroplasia	15	OO	83	83	OO.83.83
FB31.1	- - - - Fibrodysplasia ossificans progressiva	15	OO	83	83	OO.83.83
FB31.Y	- - - - Other specified calcification or ossification of muscle	15	OO	83	83	OO.83.83
FB31.Z	- - - - Calcification or ossification of muscle, unspecified	15	OO	83	83	OO.83.83
FB32	- - - Certain specified disorders of muscle	15	OO	83	83	OO.83.83
FB32.0	- - - - Diastasis of muscle	15	OO	83	83	OO.83.83
FB32.1	- - - - Spontaneous rupture of muscle	15	OO	83	83	OO.83.83
FB32.2	- - - - Ischaemic infarction of muscle	15	OO	83	83	OO.83.83
FB32.20	- - - - - Idiopathic rhabdomyolysis	15	OO
FB32.2Y	- - - - - Other specified ischaemic infarction of muscle	15	OO	83	83	OO.83.83
FB32.2Z	- - - - - Ischaemic infarction of muscle, unspecified	15	OO	83	83	OO.83.83
FB32.3	- - - - Immobility syndrome	15	OO	83	83	OO.83.83
FB32.4	- - - - Contracture of muscle	15	OO	83	83	OO.83.83
FB32.5	- - - - Muscle strain or sprain	15	OO	10	01-07
FB32.Y	- - - - Other specified disorders of muscles	15	OO	83	83	OO.83.83
FB33	- - - Secondary disorders of muscle	15	OO	83	83	OO.83.83
FB3Z	- - - Disorders of muscles, unspecified	15	OO	83	83	OO.83.83
0	- - Disorders of synovium or tendon	15	OO	83	83	OO.83.83
FB40	- - - Tenosynovitis	15	OO	40	30
FB40.0	- - - - Infectious tenosynovitis	15	OO
FB40.1	- - - - Plantar fasciitis	15	FO	10	28
FB40.2	- - - - Posterior tibial tendonitis	15	LE	83	83
FB40.3	- - - - Calcific tendinitis	15	OO	10	28
FB40.4	- - - - Trigger finger	15	HA	83	83
FB40.5	- - - - Radial styloid tenosynovitis	15	WR	40	30
FB40.Y	- - - - Other specified tenosynovitis	15	OO	40	30	OO.40.30
FB40.Z	- - - - Tenosynovitis, unspecified	15	OO	40	30	OO.40.30
FB41	- - - Spontaneous rupture of synovium or tendon	15	OO	83	83	OO.83.83
FB41.0	- - - - Spontaneous rupture of popliteal cyst	15	KN	83	83
FB41.1	- - - - Spontaneous rupture of synovium	15	OO	40	30	OO.40.30
FB41.2	- - - - Spontaneous rupture of tendon	15	OO	10	09
FB41.Y	- - - - Other specified spontaneous rupture of synovium or tendon	15	OO	83	83	OO.83.83
FB41.Z	- - - - Spontaneous rupture of synovium or tendon, unspecified	15	OO	83	83	OO.83.83
FB42	- - - Certain specified disorders of synovium or tendon	15	OO	83	83	OO.83.83
FB42.0	- - - - Acquired short Achilles tendon	15	AN	83	83	AN.83.83
FB42.1	- - - - Contracture of tendon sheath	15	OO	83	83	OO.83.83
FB42.2	- - - - Ganglion	15	OO	83	83
FB42.3	- - - - Synovial hypertrophy, not elsewhere classified	15	OO	83	83	OO.83.83
FB43	- - - Secondary disorders of synovium or tendon	15	OO	83	83	OO.83.83
FB4Y	- - - Other specified disorders of synovium or tendon	15	OO	83	83	OO.83.83
FB4Z	- - - Disorders of synovium or tendon, unspecified	15	OO	83	83	OO.83.83
0	- - Miscellaneous specified soft tissue disorders	15	OO	83	83	OO.83.83
FB50	- - - Bursitis	15	OO	40	31
FB50.0	- - - - Infectious bursitis	15	OO
FB50.1	- - - - Bursitis related to use, overuse or pressure	15	OO	40	31	OO.40.31
FB50.2	- - - - Synovial cyst of popliteal space	15	OO	40	30	OO.40.30
FB50.3	- - - - Calcium deposit in bursa	15	OO	83	83
FB50.Y	- - - - Other specified bursitis	15	OO	40	31	OO.40.31
FB50.Z	- - - - Bursitis, unspecified	15	OO	40	31	OO.40.31
FB51	- - - Fibroblastic disorders	15	OO	83	83	OO.83.83
FB51.0	- - - - Palmar fascial fibromatosis	15	HA	83	83	HA.83.83
FB51.1	- - - - Knuckle pads	15	HA	83	83	HA.83.83
FB51.2	- - - - Pseudosarcomatous fibromatosis	15	OO	83	83	OO.83.83
FB51.3	- - - - Fibroblastic rheumatism	15	OO
FB51.4	- - - - Retroperitoneal fibrosis	15	OO	83	83	OO.83.83
FB51.40	- - - - - Primary retroperitoneal fibrosis	15	OO	83	83	OO.83.83
FB51.4Y	- - - - - Other specified retroperitoneal fibrosis	15	OO	83	83	OO.83.83
FB51.Y	- - - - Other specified fibroblastic disorders	15	OO	83	83	OO.83.83
FB51.Z	- - - - Fibroblastic disorders, unspecified	15	OO
FB52	- - - Soft tissue disorders in diseases classified elsewhere	15	OO	83	83	OO.83.83
FB53	- - - Shoulder lesions	15	SH	83	83	SH.83.83
FB53.0	- - - - Adhesive capsulitis of shoulder	15	SH	40	30
FB53.1	- - - - Rotator cuff syndrome	15	SH	40	30
FB53.2	- - - - Impingement syndrome of shoulder	15	SH	40	30
FB53.Y	- - - - Other specified shoulder lesions	15	SH	83	83	SH.83.83
FB53.Z	- - - - Shoulder lesions, unspecified	15	SH	83	83	SH.83.83
FB54	- - - Enthesopathies of lower limb	15	HI/TH/KN/LE/AN	83	83
FB54.0	- - - - Iliac crest spur	15	LS	83	83
FB54.1	- - - - Iliotibial band syndrome	15	TH/KN	83	83
FB54.2	- - - - Tibial collateral bursitis	15	LE	40	31
FB54.3	- - - - Calcaneal spur	15	FO	83	83
FB54.4	- - - - Metatarsalgia	15	FO	83	83
FB54.Y	- - - - Other specified enthesopathies of lower limb	15	HI/TH/KN/LE/AN	83	83
FB54.Z	- - - - Enthesopathies of lower limb, unspecified	15	HI/TH/KN/LE/AN	83	83
FB55	- - - Certain specified enthesopathies	15	OO	83	83
FB55.0	- - - - Medial epicondylitis of elbow	15	EL	10	28
FB55.1	- - - - Lateral epicondylitis of elbow	15	EL	10	28
FB55.2	- - - - Periarthritis of wrist	15	WR	40	34
FB55.Z	- - - - Enthesopathies, unspecified	15	OO	83	83
FB56	- - - Specified soft tissue disorders, not elsewhere classified	15	OO	83	83
FB56.0	- - - - Foreign body granuloma of soft tissue, not elsewhere classified	15	OO	83	83	OO.83.83
FB56.1	- - - - Residual foreign body in soft tissue	15	OO	83	83
FB56.2	- - - - Myalgia	15	OO	83	83	OO.83.83
FB56.3	- - - - Hypertrophy of infrapatellar fat pad	15	KN	83	83	KN.83.83
FB56.4	- - - - Pain in limb	15	OO
FB56.5	- - - - Algoneurodystrophy	15	OO
FB56.6	- - - - Other specified soft tissue disorders	15	OO	83	83	OO.83.83
FB6Z	- - Soft tissue disorders, unspecified	15	OO	83	83	OO.83.83
0	- Osteopathies or chondropathies	15	OO
FB80	- - Certain specified disorders of bone density or structure	15	OO
FB80.0	- - - Fibrous dysplasia of bone	15	OO
FB80.1	- - - Skeletal fluorosis	15	OO	83	83	OO.83.83
FB80.2	- - - Osteitis condensans	15	OO	83	83	OO.83.83
FB80.3	- - - Hyperostosis of skull	15	OO	83	83	OO.83.83
FB80.4	- - - Osteosclerosis	15	OO
FB80.5	- - - Solitary bone cyst	15	OO
FB80.6	- - - Aneurysmal bone cyst	15	OO
FB80.7	- - - Malunion of fracture	15	OO	30	13-17,19
FB80.8	- - - Nonunion of fracture	15	OO	30	13-17,19
FB80.9	- - - Delayed union of fracture	15	OO	30	13-17,19
FB80.A	- - - Stress fracture, not elsewhere classified	15	OO	30	18
FB80.B	- - - Pathological fracture, not elsewhere classified	15	OO	30	13-17,19
FB80.Y	- - - Other specified disorders of bone density and structure	15	OO
FB80.Z	- - - Disorder of bone density and structure, unspecified	15	OO
FB81	- - Osteonecrosis	15	OO
FB81.0	- - - Idiopathic aseptic osteonecrosis	15	OO
FB81.1	- - - Osteonecrosis due to dialysis	15	OO
FB81.2	- - - Drug-induced osteonecrosis	15	OO
FB81.3	- - - Osteonecrosis due to trauma	15	OO
FB81.4	- - - Osteonecrosis due to haemoglobinopathy	15	OO
FB81.5	- - - Osteonecrosis due to ionizing radiation	15	OO
FB81.Y	- - - Other specified osteonecrosis	15	OO
FB81.Z	- - - Osteonecrosis, unspecified	15	OO
FB82	- - Chondropathies	15	OO	40	21	OO.40.21
FB82.0	- - - Chondromalacia	15	OO	40	21	OO.40.21
FB82.00	- - - - Chondromalacia patellae	15	OO	40	21
FB82.0Y	- - - - Other specified chondromalacia	15	OO	40	21
FB82.0Z	- - - - Chondromalacia, unspecified	15	OO
FB82.1	- - - Osteochondrosis or osteochondritis dissecans	15	OO
FB82.2	- - - Slipped upper femoral epiphysis	15	OO	30	20
FB82.3	- - - Relapsing polychondritis	15	OO	40	21	OO.40.21
FB82.Y	- - - Other specified chondropathies	15	OO	40	21	OO.40.21
FB82.Z	- - - Chondropathies, unspecified	15	OO
FB83	- - Low bone mass disorders	15	OO
FB83.0	- - - Osteopenia	15	OO
FB83.00	- - - - Premenopausal idiopathic osteopenia	15	OO
FB83.01	- - - - Postmenopausal osteopenia	15	OO
FB83.02	- - - - Senile osteopenia	15	OO
FB83.03	- - - - Osteopenia of disuse	15	OO
FB83.04	- - - - Drug-induced osteopenia	15	OO
FB83.0Y	- - - - Other specified osteopenia	15	OO
FB83.0Z	- - - - Osteopenia, unspecified	15	OO
FB83.1	- - - Osteoporosis	15	OO
FB83.10	- - - - Premenopausal idiopathic osteoporosis	15	OO
FB83.11	- - - - Postmenopausal osteoporosis	15	OO
FB83.12	- - - - Osteoporosis of disuse	15	OO
FB83.13	- - - - Drug-induced osteoporosis	15	OO
FB83.14	- - - - Osteoporosis due to malabsorption	15	OO
FB83.1Y	- - - - Other specified osteoporosis	15	OO
FB83.1Z	- - - - Osteoporosis, unspecified	15	OO
FB83.2	- - - Adult osteomalacia	15	OO
FB83.20	- - - - Aluminium bone disease	15	OO
FB83.21	- - - - Adult osteomalacia due to malnutrition	15	OO
FB83.22	- - - - Drug-induced adult osteomalacia	15	OO
FB83.2Y	- - - - Other specified adult osteomalacia	15	OO
FB83.2Z	- - - - Adult osteomalacia, unspecified	15	OO
FB84	- - Osteomyelitis or osteitis	15	OO
FB84.0	- - - Acute haematogenous osteomyelitis	15	OO
FB84.1	- - - Other acute osteomyelitis	15	OO
FB84.2	- - - Subacute osteomyelitis	15	OO
FB84.3	- - - Chronic multifocal osteomyelitis	15	OO
FB84.4	- - - Chronic osteomyelitis with draining sinus	15	OO
FB84.5	- - - Other chronic haematogenous osteomyelitis	15	OO
FB84.Y	- - - Other specified osteomyelitis or osteitis	15	OO
FB84.Z	- - - Osteomyelitis or osteitis, unspecified	15	OO
FB85	- - Paget disease of bone	15	OO
FB85.0	- - - Juvenile Paget disease	15	OO
FB85.1	- - - Paget disease of bone in neoplastic disease	15	OO
FB85.Y	- - - Other specified Paget disease of bone	15	OO
FB85.Z	- - - Paget disease of bone, unspecified	15	OO
FB86	- - Disorders associated with bone growth	15	OO
FB86.0	- - - Epiphyseal arrest	15	OO	30	20	OO.30.20
FB86.1	- - - Bone hyperplasias	15	OO
FB86.10	- - - - Hypertrophic osteoarthropathy	15	OO
FB86.11	- - - - Hypertrophy of bone	15	OO
FB86.1Y	- - - - Other specified bone hyperplasias	15	OO
FB86.1Z	- - - - Bone hyperplasias, unspecified	15	OO
FB86.2	- - - Osteolysis	15	OO
FB86.Y	- - - Other specified disorders associated with bone growth	15	OO
FB86.Z	- - - Disorders associated with bone growth, unspecified	15	OO
FB8Y	- - Other specified osteopathies or chondropathies	15	OO
FB8Z	- - Osteopathies or chondropathies, unspecified	15	OO
FC00	- Certain specified acquired deformities of musculoskeletal system or connective tissue, not elsewhere classified	15	OO	83	83	OO.83.83
FC00.0	- - Acquired deformity of nose	15	HE	83	83	HE.83.83
FC00.1	- - Acquired deformity of neck	15	NE	83	83	NE.83.83
FC00.2	- - Acquired deformity of chest or rib	15	CH	83	83	CH.83.83
FC00.3	- - Acquired deformity of pelvis	15	HI/TH/LS	83	83
FC00.4	- - Acquired deformity of trunk	15	CH/T/LS/ABS	83	83
FC00.Y	- - Other acquired deformities of musculoskeletal system and connective tissue, not classified elsewhere	15	OO	83	83	OO.83.83
FC01	- Postprocedural disorders of the musculoskeletal system	15	OO
FC01.0	- - Pseudarthrosis after fusion or arthrodesis	15	OO	83	83	OO.83.83
FC01.1	- - Postlaminectomy syndrome, not elsewhere classified	15	NE/TS/LS	83	83
FC01.2	- - Post radiation kyphosis	15	TS	83	83	TS.83.83
FC01.3	- - Postlaminectomy kyphosis	15	TS	83	83	TS.83.83
FC01.4	- - Postsurgical lordosis	15	LS	83	83	LS.83.83
FC01.5	- - Post radiation scoliosis	15
FC01.6	- - Fracture of bone following insertion of orthopaedic implant, joint prosthesis, or bone plate	15	OO	30	13-17,19
FC01.7	- - Nonunion after arthrodesis	15	OO	83	83	OO.83.83
FC01.70	- - - Nonunion after spinal arthrodesis	15	OO	83	83	OO.83.83
FC01.7Y	- - - Nonunion after arthrodesis of other sites	15	OO	83	83	OO.83.83
FC01.8	- - Postsurgical osteolysis	15	OO
FC01.9	- - Postoophorectomy osteoporosis	15	OO
FC01.A	- - Postsurgical malabsorption osteoporosis	15	OO
FC0Y	- Other specified diseases of the musculoskeletal system or connective tissue	15	OO
FC0Z	- Diseases of the musculoskeletal system or connective tissue, unspecified	15	OO
0	Symptoms, signs or clinical findings, not elsewhere classified	21	OO	83	83	OO.83.83
0	- Symptoms, signs or clinical findings of blood, blood-forming organs, or the immune system	21	OO
0	- - Symptoms of blood, blood-forming organs, or the immune system	21	OO
MA00	- - - Symptom or complaint of the blood	21	OO
MA01	- - - Enlarged lymph nodes	21	OO
MA01.0	- - - - Localised lymph node enlargement	21	OO
MA01.1	- - - - Generalised lymph node enlargement	21	OO
MA01.Z	- - - - Enlarged lymph nodes, unspecified	21	OO
MA0Y	- - - Other specified symptoms of blood, blood-forming organs, or the immune system	21	OO
0	- - Clinical findings in blood, blood-forming organs, or the immune system	21	OO
MA10	- - - Abnormal serum enzyme levels	21	OO
MA10.0	- - - - Elevation of levels of transaminase or lactic acid dehydrogenase	21	OO
MA10.1	- - - - Abnormal levels of other specified serum enzymes	21	OO
MA10.2	- - - - Abnormal level of unspecified serum enzyme	21	OO
MA11	- - - Clinical findings of hormones in blood, blood-forming organs, or the immune system	21	OO
MA12	- - - Clinical findings of drugs, medicaments and biological substances in blood, blood-forming organs, or the immune system	21	OO
MA12.0	- - - - Finding of opiate drug in blood	21	OO
MA12.1	- - - - Finding of cocaine in blood	21	OO
MA12.2	- - - - Finding of hallucinogen in blood	21	OO
MA12.3	- - - - Finding of psychotropic drug in blood	21	OO
MA12.4	- - - - Finding of steroid agent in blood	21	OO
MA12.Y	- - - - Other specified clinical findings of drugs, medicaments and biological substances in blood, blood-forming organs, or the immune system	21	OO
MA13	- - - Clinical findings of substances chiefly nonmedicinal as to source in blood, blood-forming organs, or the immune system	21	OO
MA13.0	- - - - Finding of abnormal level of heavy metals in blood	21	OO
MA13.00	- - - - - Abnormal level of lead in blood	21	OO
MA13.0Y	- - - - - Finding of abnormal level of other specified heavy metals in blood	21	OO
MA13.1	- - - - Finding of alcohol in blood	21	OO
MA13.Y	- - - - Abnormal level of other specified substances chiefly nonmedicinal as to source in blood, blood-forming organs and the immune system	21	OO
MA14	- - - Immunological findings in blood, blood-forming organs, or the immune system	21	OO
MA14.0	- - - - Laboratory evidence of human immunodeficiency virus	21	OO
MA14.1	- - - - Certain specified immunological findings	21	OO
MA14.10	- - - - - Abnormal reaction to tuberculin test	21	OO
MA14.11	- - - - - Anticitrullinated protein antibody negative	21	OO
MA14.12	- - - - - Anticitrullinated protein antibody positive	21	OO
MA14.13	- - - - - Anti-nuclear antibody negative	21	OO
MA14.14	- - - - - Anti-nuclear antibody positive	21	OO
MA14.15	- - - - - Elevated C-reactive protein	21	OO
MA14.16	- - - - - False-positive serological test for syphilis	21	OO
MA14.17	- - - - - Human leukocyte antigen negative	21	OO
MA14.18	- - - - - Human leukocyte antigen positive	21	OO
MA14.19	- - - - - Neural autoantibody negative	21	OO
MA14.1A	- - - - - Neural autoantibody positive	21	OO
MA14.1B	- - - - - Prostate specific antigen positive	21	OO
MA14.1C	- - - - - Raised antibody titre	21	OO
MA14.1D	- - - - - Rheumatoid factor negative	21	OO
MA14.1E	- - - - - Rheumatoid factor positive	21	OO
MA14.Y	- - - - Other specified immunological findings in blood, blood-forming organs, or the immune system	21	OO
MA15	- - - Microbiological findings in blood, blood-forming organs, or the immune system	21	OO
MA15.0	- - - - Bacteraemia	21	OO
MA15.Y	- - - - Other specified microbiological findings in blood, blood-forming organs, or the immune system	21	OO
MA16	- - - Cytological findings in blood, blood-forming organs, or the immune system	21	OO
MA16.0	- - - - Abnormality of red blood cells	21	OO
MA16.00	- - - - - Haemolysis, not elsewhere classified	21	OO
MA16.0Y	- - - - - Other specified abnormality of red blood cells	21	OO
MA16.0Z	- - - - - Abnormality of red blood cells, unspecified	21	OO
MA16.1	- - - - Abnormality of white blood cells	21	OO
MA16.10	- - - - - Decreased white blood cell count	21	OO
MA16.11	- - - - - Elevated white blood cell count	21	OO
MA16.12	- - - - - Low white blood cell count	21	OO
MA16.Y	- - - - Other specified cytological findings in blood, blood-forming organs, or the immune system	21	OO
MA16.Z	- - - - Cytological findings in blood, blood-forming organs, or the immune system, unspecified	21	OO
MA17	- - - Histological findings in blood, blood-forming organs, or the immune system	21	OO
MA18	- - - Certain clinical findings of blood chemistry	21	OO
MA18.0	- - - - Elevated blood glucose level	21	OO
MA18.00	- - - - - Abnormal glucose tolerance test	21	OO
MA18.0Y	- - - - - Other specified elevated blood glucose level	21	OO
MA18.1	- - - - Abnormal level of blood mineral	21	OO
MA18.2	- - - - Abnormal arterial blood-gas level	21	OO
MA18.3	- - - - Abnormal coagulation profile	21	OO
MA18.4	- - - - Low haemoglobin	21	OO
MA18.Y	- - - - Other specified abnormal findings of blood chemistry	21	OO
MA18.Z	- - - - Abnormal findings of blood chemistry, unspecified	21	OO
MA19	- - - Certain abnormalities of plasma proteins	21	OO
MA19.0	- - - - Abnormality of albumin	21	OO
MA19.1	- - - - Abnormality of alphafetoprotein	21	OO
MA19.2	- - - - Abnormality of globulin	21	OO
MA19.Y	- - - - Abnormalities of other specified plasma proteins	21	OO
MA19.Z	- - - - Abnormalities of unspecified plasma proteins	21	OO
MA1A	- - - Elevated erythrocyte sedimentation rate or abnormality of plasma viscosity	21	OO
MA1A.0	- - - - Elevated erythrocyte sedimentation rate	21	OO
MA1A.1	- - - - Abnormal plasma viscosity	21	OO
MA1Y	- - - Other specified clinical findings in blood, blood-forming organs, or the immune system	21	OO
MA3Y	- - Other specified symptoms, signs or clinical findings of blood, blood-forming organs, or the immune system	21	OO
0	- Symptoms, signs or clinical findings of endocrine, nutritional or metabolic diseases	21	OO
0	- - Results of function studies of the endocrine, nutritional or metabolic diseases	21	OO
MA50	- - - Abnormal results of thyroid function studies	21	OO
MA51	- - - Abnormal results of other endocrine function studies	21	OO
MA6Y	- - Other specified symptoms, signs or clinical findings of endocrine, nutritional or metabolic diseases	21	OO
0	- Symptoms, signs or clinical findings of speech or voice	21	OO
0	- - Symptoms or signs involving speech or voice	21	HE
MA80	- - - Speech disturbances	21	HE
MA80.0	- - - - Aphasia	21	HE
MA80.1	- - - - Dysphasia	21	HE
MA80.2	- - - - Dysarthria	21	HE
MA80.20	- - - - - Anarthria	21	HE
MA80.2Y	- - - - - Other specified dysarthria	21	HE
MA80.2Z	- - - - - Dysarthria, unspecified	21	HE
MA80.Y	- - - - Other specified speech disturbances	21	HE
MA80.Z	- - - - Speech disturbances, unspecified	21	HE
MA81	- - - Speech dysfluency	21	HE
MA82	- - - Voice disturbances	21	HE
MA82.0	- - - - Aphonia	21	HE
MA82.1	- - - - Dysphonia	21	HE
MA82.10	- - - - - Hoarseness	21	HE
MA82.1Y	- - - - - Other specified dysphonia	21	HE
MA82.1Z	- - - - - Dysphonia, unspecified	21	HE
MA82.2	- - - - Nasality	21	HE
MA82.Y	- - - - Other specified voice disturbances	21	HE
MA82.Z	- - - - Voice disturbances, unspecified	21	HE
MA8Y	- - - Other specified symptoms or signs involving speech or voice	21	HE
MB0Y	- - Other specified symptoms, signs or clinical findings of speech or voice	21	HE
0	- Mental or behavioural symptoms, signs or clinical findings	21	HE
MB20	- - Symptoms, signs or clinical findings involving consciousness	21	HE
MB20.0	- - - Stupor	21	HE
MB20.1	- - - Coma	21	HE
MB20.2	- - - Clouding of consciousness	21	HE
MB20.Y	- - - Other specified symptoms, signs or clinical findings involving consciousness	21	HE
MB21	- - Symptoms, signs or clinical findings involving cognition	21	HE
MB21.0	- - - Age-associated cognitive decline	21	HE
MB21.1	- - - Amnesia	21	HE
MB21.10	- - - - Anterograde amnesia	21	HE
MB21.11	- - - - Retrograde amnesia	21	HE
MB21.12	- - - - Transient global amnesia	21	HE
MB21.1Z	- - - - Amnesia, unspecified	21	HE
MB21.2	- - - Anosognosia	21	HE
MB21.3	- - - Confabulation	21	HE
MB21.4	- - - Disorientation	21	HE
MB21.5	- - - Distractibility	21	HE
MB21.6	- - - Impaired abstract thinking	21	HE
MB21.7	- - - Impaired executive functioning	21	HE
MB21.8	- - - Impaired judgment	21	HE
MB21.9	- - - Perseveration	21	HE
MB21.A	- - - Poor concentration	21	HE
MB21.B	- - - Racing thoughts	21	HE
MB21.Y	- - - Other specified symptoms and signs involving cognition	21	HE
MB21.Z	- - - Symptoms and signs involving cognition, unspecified	21	HE
MB22	- - Symptoms or signs involving motivation or energy	21	OO
MB22.0	- - - Avolition	21	OO
MB22.1	- - - Decreased libido	21	OO
MB22.2	- - - Demoralization	21	OO
MB22.3	- - - Hopelessness	21	OO
MB22.4	- - - Increased energy	21	OO
MB22.5	- - - Increased goal-directed activity	21	OO
MB22.6	- - - Increased libido	21	OO
MB22.7	- - - Tiredness	21	OO
MB22.Y	- - - Other specified symptoms and signs involving motivation or energy	21	OO
MB22.Z	- - - Symptoms or signs involving motivation or energy, unspecified	21	OO
MB23	- - Symptoms or signs involving appearance or behaviour	21	OO
MB23.0	- - - Aggressive behaviour	21	OO
MB23.1	- - - Antisocial behaviour	21	OO
MB23.2	- - - Avoidance behaviour	21	OO
MB23.3	- - - Bradyphrenia	21	OO
MB23.4	- - - Compulsions	21	OO
MB23.5	- - - Coprolalia	21	OO
MB23.6	- - - Disorganized behaviour	21	OO
MB23.7	- - - Disheveled appearance	21	OO
MB23.8	- - - Disruptive behaviour	21	OO
MB23.9	- - - Echolalia	21	OO
MB23.A	- - - Excessive crying of child, adolescent, or adult	21	OO
MB23.B	- - - Feigning of symptoms	21	OO
MB23.C	- - - Increased sociability	21	OO
MB23.D	- - - Mutism	21	OO
MB23.E	- - - Non-suicidal self-injury	21	OO
MB23.F	- - - Odd or peculiar appearance	21	OO
MB23.G	- - - Odd or peculiar behaviour	21	OO
MB23.H	- - - Panic attack	21	OO
MB23.J	- - - Poor personal hygiene	21	OO
MB23.K	- - - Poverty of speech	21	OO
MB23.L	- - - Pressured speech	21	OO
MB23.M	- - - Psychomotor agitation	21	OO
MB23.N	- - - Psychomotor retardation	21	OO
MB23.Q	- - - Social withdrawal	21	OO
MB23.R	- - - Suicide attempt	21	OO
MB23.S	- - - Suicidal behaviour	21	OO
MB23.Y	- - - Other specified symptoms and signs involving appearance and behaviour	21	OO
MB23.Z	- - - Symptoms and signs involving appearance and behaviour, unspecified	21	OO
MB24	- - Symptoms or signs involving mood or affect	21	OO
MB24.0	- - - Ambivalence	21	OO
MB24.1	- - - Anger	21	OO
MB24.2	- - - Anhedonia	21	OO
MB24.3	- - - Anxiety	21	OO
MB24.4	- - - Apathy	21	OO
MB24.5	- - - Depressed mood	21	OO
MB24.6	- - - Disturbance of affect	21	OO
MB24.60	- - - - Constricted affect	21	OO
MB24.61	- - - - Blunted affect	21	OO
MB24.62	- - - - Flat affect	21	OO
MB24.63	- - - - Labile affect	21	OO
MB24.64	- - - - Inappropriate affect	21	OO
MB24.6Y	- - - - Other specified disturbance of affect	21	OO
MB24.6Z	- - - - Disturbance of affect, unspecified	21	OO
MB24.7	- - - Dysphoria	21	OO
MB24.8	- - - Elevated mood	21	OO
MB24.9	- - - Euphoria	21	OO
MB24.A	- - - Fear	21	OO
MB24.B	- - - Feelings of guilt	21	OO
MB24.C	- - - Irritability	21	OO
MB24.D	- - - Leaden paralysis	21	OO
MB24.E	- - - Mental rumination	21	OO
MB24.F	- - - Restlessness	21	OO
MB24.G	- - - Tantrum	21	OO
MB24.H	- - - Worry	21	OO
MB24.Y	- - - Other specified symptoms and signs involving mood or affect	21	OO
MB24.Z	- - - Symptoms and signs involving mood or affect, unspecified	21	OO
MB25	- - Symptoms or signs involving form of thought	21	OO
MB25.0	- - - Symptoms and signs of thought disorder	21	OO
MB25.00	- - - - Circumstantiality	21	OO
MB25.01	- - - - Tangentiality	21	OO
MB25.02	- - - - Disorganised thinking	21	OO
MB25.03	- - - - Incoherence	21	OO
MB25.0Y	- - - - Other specified symptoms and signs of thought disorder	21	OO
MB25.0Z	- - - - Symptoms and signs of thought disorder, unspecified	21	OO
MB25.1	- - - Flight of ideas	21	OO
MB25.2	- - - Neologisms	21	OO
MB25.3	- - - Thought blocking	21	OO
MB25.Y	- - - Other specified symptoms and signs of form of thought	21	OO
MB25.Z	- - - Symptoms and signs of form of thought, unspecified	21	OO
MB26	- - Symptoms or signs involving content of thought	21	OO
MB26.0	- - - Delusion	21	OO
MB26.00	- - - - Bizarre delusion	21	OO
MB26.01	- - - - Delusion of being controlled	21	OO
MB26.02	- - - - Delusion of guilt	21	OO
MB26.03	- - - - Delusion of reference	21	OO
MB26.04	- - - - Erotomanic delusion	21	OO
MB26.05	- - - - Grandiose delusion	21	OO
MB26.06	- - - - Jealous delusion	21	OO
MB26.07	- - - - Persecutory delusion	21	OO
MB26.08	- - - - Religious delusion	21	OO
MB26.09	- - - - Somatic delusion	21	OO
MB26.0A	- - - - Nihilistic delusion	21	OO
MB26.0B	- - - - Misidentification delusion	21	OO
MB26.0C	- - - - Delusion of impoverishment	21	OO
MB26.0Y	- - - - Other specified delusion	21	OO
MB26.0Z	- - - - Delusion, unspecified	21	OO
MB26.1	- - - Experiences of influence, passivity, and control	21	OO
MB26.10	- - - - Thought broadcasting	21	OO
MB26.11	- - - - Thought insertion	21	OO
MB26.12	- - - - Thought withdrawal	21	OO
MB26.1Y	- - - - Other specified experiences of influence, passivity, and control	21	OO
MB26.1Z	- - - - Experiences of influence, passivity, and control, unspecified	21	OO
MB26.2	- - - Grandiosity	21	OO
MB26.3	- - - Homicidal ideation	21	OO
MB26.4	- - - Identity disturbance	21	OO
MB26.5	- - - Obsessions	21	OO
MB26.6	- - - Overvalued ideas	21	OO
MB26.7	- - - Paranoid ideation	21	OO
MB26.8	- - - Referential thinking	21	OO
MB26.9	- - - Suspiciousness	21	OO
MB26.A	- - - Suicidal ideation	21	OO
MB26.Y	- - - Other specified symptoms or signs involving content of thought	21	OO
MB26.Z	- - - Symptoms or signs involving content of thought, unspecified	21	OO
MB27	- - Symptoms or signs involving perceptual disturbance	21	OO
MB27.0	- - - Depersonalisation	21	OO
MB27.1	- - - Derealisation	21	OO
MB27.2	- - - Hallucinations	21	OO
MB27.20	- - - - Auditory hallucinations	21	OO
MB27.21	- - - - Gustatory hallucinations	21	OO
MB27.22	- - - - Hypnopompic hallucinations	21	OO
MB27.23	- - - - Hypnogogic hallucinations	21	OO
MB27.24	- - - - Olfactory hallucinations	21	OO
MB27.25	- - - - Somatic hallucinations	21	OO
MB27.26	- - - - Tactile hallucinations	21	OO
MB27.27	- - - - Visual hallucinations	21	OO
MB27.2Y	- - - - Other specified hallucinations	21	OO
MB27.2Z	- - - - Hallucinations, unspecified	21	OO
MB27.3	- - - Disturbance of body image	21	OO
MB27.4	- - - Illusions	21	OO
MB27.Y	- - - Other specified symptoms and signs of perceptual disturbance	21	OO
MB27.Z	- - - Symptoms and signs of perceptual disturbance, unspecified	21	OO
MB28	- - Symptoms or signs related to personality features	21	OO
MB28.0	- - - Attention seeking	21	OO
MB28.1	- - - Callousness	21	OO
MB28.2	- - - Eccentricity	21	OO
MB28.3	- - - Entitlement	21	OO
MB28.4	- - - Hostility	21	OO
MB28.5	- - - Impulsivity	21	OO
MB28.6	- - - Indecisiveness	21	OO
MB28.7	- - - Irresponsibility	21	OO
MB28.8	- - - Low frustration tolerance	21	OO
MB28.9	- - - Low self-esteem	21	OO
MB28.A	- - - Negative affectivity	21	OO
MB28.B	- - - Negativism	21	OO
MB28.C	- - - Perfectionism	21	OO
MB28.D	- - - Pessimism	21	OO
MB28.E	- - - Recklessness	21	OO
MB28.F	- - - Sensation seeking	21	OO
MB28.G	- - - Stubbornness	21	OO
MB28.H	- - - Submissiveness	21	OO
MB28.Y	- - - Other specified symptoms and signs related to personality features	21	OO
MB28.Z	- - - Symptoms and signs related to personality features, unspecified	21	OO
MB29	- - Symptoms or signs involving eating and related behaviour	21	OO
MB29.0	- - - Avoidant or restrictive eating	21	OO
MB29.1	- - - Binge eating	21	OO
MB29.2	- - - Eating of non-nutritive substances	21	OO
MB29.3	- - - Purging behaviour	21	OO
MB29.4	- - - Rumination-regurgitation	21	OO
MB29.Y	- - - Other specified symptoms and signs involving eating and related behaviour	21	OO
MB29.Z	- - - Symptoms and signs involving eating and related behaviour, unspecified	21	OO
MB2A	- - Symptoms or signs involving elimination	21	OO
MB2A.0	- - - Soiling	21	OO
MB2A.1	- - - Wetting	21	OO
MB2A.Y	- - - Other specified symptoms and signs involving elimination	21	OO
MB2A.Z	- - - Symptoms and signs involving elimination, unspecified	21	OO
MB2Y	- - Other specified mental or behavioural symptoms, signs or clinical findings	21	OO
0	- Symptoms, signs or clinical findings of the nervous system	21	OO
0	- - Symptoms or signs involving the nervous system	21	OO
MB40	- - - Sensation disturbance	21	OO
MB40.0	- - - - Asomatognosia	21	OO
MB40.1	- - - - Allodynia	21	OO
MB40.2	- - - - Anacusis	21	OO
MB40.3	- - - - Anaesthesia of skin	21	OO
MB40.4	- - - - Tingling fingers or feet or toes	21	OO
MB40.5	- - - - Hyperaesthesia	21	OO
MB40.6	- - - - Dysesthesia	21	OO
MB40.7	- - - - Acroparesthesia	21	OO
MB40.8	- - - - Analgesia	21	OO
MB40.9	- - - - Neurological neglect syndrome	21	OO
MB40.Y	- - - - Other specified sensation disturbance	21	OO
MB40.Z	- - - - Sensation disturbance, unspecified	21	OO
MB41	- - - Disturbances of smell and taste	21	OO
MB41.0	- - - - Anosmia	21	OO
MB41.1	- - - - Parosmia	21	OO
MB41.2	- - - - Dysgeusia	21	OO
MB41.3	- - - - Hyposmia	21	OO
MB41.Y	- - - - Other specified disturbances of smell and taste	21	OO
MB41.Z	- - - - Disturbances of smell and taste, unspecified	21	OO
MB42	- - - Phonophobia	21	OO
MB43	- - - Dyssomnia	21	OO
MB44	- - - Abnormalities of gait and mobility	21	OO
MB44.0	- - - - Ataxic gait	21	OO
MB44.1	- - - - Paralytic gait	21	OO
MB44.2	- - - - Difficulty in walking	21	OO
MB44.3	- - - - Immobility	21	OO
MB44.Y	- - - - Other specified abnormalities of gait and mobility	21	OO
MB44.Z	- - - - Abnormalities of gait and mobility, unspecified	21	OO
MB45	- - - Lack of coordination	21	OO
MB45.0	- - - - Ataxia, unspecified	21	OO
MB45.1	- - - - Automatism	21	OO
MB45.2	- - - - Atonia	21	OO
MB45.3	- - - - Head drop	21	OO
MB45.4	- - - - Intention tremor	21	OO
MB45.Y	- - - - Other specified lack of coordination	21	OO
MB45.Z	- - - - Lack of coordination, unspecified	21	OO
MB46	- - - Abnormal involuntary movements	21	OO
MB46.0	- - - - Asterixis	21	OO
MB46.1	- - - - Abnormal head movements	21	OO
MB46.2	- - - - Athetosis	21	OO
MB46.3	- - - - Drop attack	21	OO
MB46.4	- - - - Titubation	21	OO
MB46.5	- - - - Shuddering	21	OO
MB46.Y	- - - - Other specified abnormal involuntary movements	21	OO
MB46.Z	- - - - Abnormal involuntary movements, unspecified	21	OO
MB47	- - - Abnormality of tonus and reflex	21	OO
MB47.0	- - - - Abnormal reflex	21	OO
MB47.1	- - - - Abnormal posture	21	OO
MB47.2	- - - - Clonus	21	OO
MB47.3	- - - - Cramp or spasm	21	OO
MB47.4	- - - - Dystonia	21	OO
MB47.5	- - - - Fasciculation	21	OO
MB47.50	- - - - - Myokymia	21	OO
MB47.6	- - - - Meningismus	21	OO
MB47.7	- - - - Muscle fibrillation	21	OO
MB47.8	- - - - Muscular hypertonia	21	OO
MB47.9	- - - - Myotonia	21	OO
MB47.A	- - - - Ophthalmoparesis	21	OO
MB47.B	- - - - Opisthotonos	21	OO
MB47.C	- - - - Tendency to fall	21	OO
MB47.D	- - - - Tetany	21	OO
MB47.Y	- - - - Other specified abnormality of tonus and reflex	21	OO
MB47.Z	- - - - Abnormality of tonus and reflex, unspecified	21	OO
MB48	- - - Dizziness and giddiness	21	OO
MB48.0	- - - - Vertigo	21	OO
MB48.00	- - - - - Vertigo of central origin	21	OO
MB48.0Y	- - - - - Other specified vertigo	21	OO
MB48.0Z	- - - - - Vertigo, unspecified	21	OO
MB48.1	- - - - Disorder equilibrium	21	OO
MB48.2	- - - - Exertional dizziness	21	OO
MB48.3	- - - - Light-headedness	21	OO
MB48.4	- - - - Presyncope	21	OO
MB48.Y	- - - - Other specified dizziness and giddiness	21	OO
MB48.Z	- - - - Dizziness and giddiness, unspecified	21	OO
MB49	- - - Aura	21	OO
MB4A	- - - Apraxia	21	OO
MB4B	- - - Symbolic dysfunctions	21	OO
MB4B.0	- - - - Dyslexia and alexia	21	OO
MB4B.1	- - - - Agnosia	21	OO
MB4B.2	- - - - Acalculia	21	OO
MB4B.3	- - - - Agraphia	21	OO
MB4B.4	- - - - Anomia	21	OO
MB4B.5	- - - - Dyscalculia	21	OO
MB4B.Y	- - - - Other specified symbolic dysfunctions	21	OO
MB4B.Z	- - - - Symbolic dysfunctions, unspecified	21	OO
MB4C	- - - Gerstmann syndrome	21	OO
0	- - - Paralytic symptoms	21	OO	20	40	OO.20.40
MB50	- - - - Tetraplegia	21	OO	20	40	OO.20.40
MB50.0	- - - - - Flaccid tetraplegia	21	OO	20	40	OO.20.40
MB50.1	- - - - - Spastic tetraplegia	21	OO	20	40	OO.20.40
MB50.Z	- - - - - Tetraplegia, unspecified	21	OO	20	40	OO.20.40
MB51	- - - - Diplegia of upper extremities	21	OO	20	40	OO.20.40
MB51.0	- - - - - Flaccid diplegia of upper extremities	21	OO	20	40	OO.20.40
MB51.1	- - - - - Spastic diplegia of upper extremities	21	OO	20	40	OO.20.40
MB51.Z	- - - - - Diplegia of upper extremities, unspecified	21	OO	20	40	OO.20.40
MB52	- - - - Diplegia of lower extremities	21	OO	20	40	OO.20.40
MB53	- - - - Hemiplegia	21	OO	20	40	OO.20.40
MB53.0	- - - - - Alternating hemiplegia	21	OO	20	40	OO.20.40
MB53.1	- - - - - Flaccid hemiplegia	21	OO	20	40	OO.20.40
MB53.2	- - - - - Spastic hemiplegia	21	OO	20	40	OO.20.40
MB53.Z	- - - - - Hemiplegia, unspecified	21	OO	20	40	OO.20.40
MB54	- - - - Monoplegia of upper extremity	21	OO	20	40	OO.20.40
MB54.0	- - - - - Flaccid monoplegia of upper extremity	21	OO	20	40	OO.20.40
MB54.1	- - - - - Spastic monoplegia of upper extremity	21	OO	20	40	OO.20.40
MB54.Z	- - - - - Monoplegia of upper extremity, unspecified	21	OO	20	40	OO.20.40
MB55	- - - - Monoplegia of lower extremity	21	OO	20	40	OO.20.40
MB55.0	- - - - - Flaccid monoplegia of lower extremity	21	OO	20	40	OO.20.40
MB55.1	- - - - - Spastic monoplegia of lower extremity	21	OO	20	40	OO.20.40
MB55.Z	- - - - - Monoplegia of lower extremity, unspecified	21	OO	20	40	OO.20.40
MB56	- - - - Paraplegia	21	OO	20	40
MB57	- - - - Functional level of injury of spinal cord	21	OO	20	40	OO.20.40
MB57.0	- - - - - Functional level of injury of cervical spinal cord	21	OO	20	40	OO.20.40
MB57.1	- - - - - Functional level of injury of thoracic spinal cord	21	OO	20	40	OO.20.40
MB57.2	- - - - - Functional level of injury of lumbar spinal cord	21	OO	20	40	OO.20.40
MB57.3	- - - - - Functional level of injury of spinal cord, sacrum	21	OO	20	40	OO.20.40
MB57.Y	- - - - - Other specified functional level of injury of spinal cord	21	OO	20	40	OO.20.40
MB57.Z	- - - - - Functional level of injury of spinal cord, unspecified	21	OO	20	40	OO.20.40
MB5Y	- - - - Other specified paralytic symptoms	21	OO	20	40	OO.20.40
MB5Z	- - - - Paralytic symptoms, unspecified	21	OO	20	40	OO.20.40
MB60	- - - Sleeptalking	21	OO
MB6Y	- - - Other specified symptoms or signs involving the nervous system	21	OO
0	- - Clinical findings in the nervous system	21	OO
MB70	- - - Clinical findings in cerebrospinal fluid	21	OO
MB70.0	- - - - Abnormal level of enzymes in cerebrospinal fluid	21	OO
MB70.1	- - - - Abnormal level of hormones in cerebrospinal fluid	21	OO
MB70.2	- - - - Abnormal level of drugs, medicaments and biological substances in cerebrospinal fluid	21	OO
MB70.3	- - - - Abnormal level of substances chiefly nonmedicinal as to source in cerebrospinal fluid	21	OO
MB70.4	- - - - Abnormal immunological findings in cerebrospinal fluid	21	OO
MB70.5	- - - - Abnormal microbiological findings in cerebrospinal fluid	21	OO
MB70.6	- - - - Abnormal cytological findings in cerebrospinal fluid	21	OO
MB70.7	- - - - Abnormal histological findings in cerebrospinal fluid	21	OO
MB70.8	- - - - Other abnormal findings in cerebrospinal fluid	21	OO
MB70.Y	- - - - Other specified clinical findings in cerebrospinal fluid	21	OO
MB70.Z	- - - - Clinical findings in cerebrospinal fluid, unspecified	21	OO
MB71	- - - Clinical findings on diagnostic imaging of central nervous system	21	OO
MB71.0	- - - - Intracranial space-occupying lesion	21	OO
MB71.Y	- - - - Other specified clinical findings on diagnostic imaging of central nervous system	21	OO
MB71.Z	- - - - Clinical findings on diagnostic imaging of central nervous system, unspecified	21	OO
MB72	- - - Results of function studies of the nervous system	21	OO
MB7Y	- - - Other specified clinical findings in the nervous system	21	OO
MB9Y	- - Other specified symptoms, signs or clinical findings of the nervous system	21	OO
0	- Symptoms, signs or clinical findings of the visual system	21	HE
0	- - Symptoms or signs involving the visual system	21	HE
MC10	- - - Eye appearance abnormal	21	HE
MC11	- - - Eye sensation abnormal	21	HE
MC12	- - - Chronic enlargement of lacrimal gland	21	HE
MC13	- - - Epiphora	21	HE
MC14	- - - Eye discharge	21	HE
MC15	- - - Red eye	21	HE
MC16	- - - Pallor conjunctiva	21	HE
MC17	- - - Icteric sclera	21	HE
MC18	- - - Ocular pain	21	HE
MC19	- - - Quadrantanopia	21	HE
MC1A	- - - Visual floaters	21	HE
MC1B	- - - Symptom or complaint of the eyelid	21	HE
MC1C	- - - Symptom or complaint of glasses	21	HE
MC1D	- - - Symptom or complaint of contact lens	21	HE
MC1Y	- - - Other specified symptoms or signs involving the visual system	21	HE
MC20	- - Clinical findings of the visual system	21	HE
MC20.0	- - - Staphyloma	21	HE
MC20.1	- - - Small drusen of the macula	21	HE
MC21	- - Impairment of electrophysiological functions	21	HE
MC21.0	- - - Profound impairment of electrooculogram	21	HE
MC21.1	- - - Normal electroretinogram	21	HE
MC21.Y	- - - Other specified impairment of electrophysiological functions	21	HE
MC21.Z	- - - Impairment of electrophysiological functions, unspecified	21	HE
MC2Y	- - Other specified symptoms, signs or clinical findings of the visual system	21	HE
0	- Symptoms, signs or clinical findings of ear or mastoid process	21	HE
0	- - Symptoms or signs involving the ear or mastoid process	21	HE
MC40	- - - Plugged feeling ear	21	HE
MC41	- - - Tinnitus	21	HE
MC4Y	- - - Other specified symptoms or signs involving the ear or mastoid process	21	HE
MC6Y	- - Other specified symptoms, signs or clinical findings of ear or mastoid process	21	HE
0	- Symptoms, signs or clinical findings of the circulatory system	21	OO
0	- - Symptoms or signs involving the circulatory system	21	OO
MC80	- - - Abnormal blood-pressure reading, without diagnosis	21	OO
MC80.0	- - - - Elevated blood-pressure reading, without diagnosis of hypertension	21	OO
MC80.00	- - - - - White coat hypertension	21	OO
MC80.0Y	- - - - - Other specified elevated blood-pressure reading, without diagnosis of hypertension	21	OO
MC80.0Z	- - - - - Elevated blood-pressure reading, without diagnosis of hypertension, unspecified	21	OO
MC80.1	- - - - Nonspecific low blood-pressure reading	21	OO
MC80.Y	- - - - Other specified abnormal blood-pressure reading, without diagnosis	21	OO
MC80.Z	- - - - Abnormal blood-pressure reading, without diagnosis, unspecified	21	OO
MC81	- - - Abnormalities of heart beat	21	CH
MC81.0	- - - - Tachycardia, unspecified	21	CH
MC81.1	- - - - Bradycardia, unspecified	21	CH
MC81.2	- - - - Palpitations	21	CH
MC81.3	- - - - Paroxysmal tachycardia	21	CH
MC81.4	- - - - Pulseless electrical activity, not elsewhere classified	21	CH
MC81.Y	- - - - Other specified abnormalities of heart beat	21	CH
MC81.Z	- - - - Abnormalities of heart beat, unspecified	21	CH
MC82	- - - Cardiac arrest	21	CH
MC82.0	- - - - Ventricular tachycardia and fibrillation cardiac arrest	21	CH
MC82.1	- - - - Bradycardic cardiac arrest	21	CH
MC82.2	- - - - Asystolic cardiac arrest	21	CH
MC82.3	- - - - Cardiac arrest with pulseless electrical activity	21	CH
MC82.4	- - - - Cardiopulmonary arrest	21	CH
MC82.Z	- - - - Cardiac arrest, unspecified	21	CH
MC83	- - - Cardiac murmurs and other cardiac sounds	21	CH
MC83.0	- - - - Benign and innocent cardiac murmurs	21	CH
MC83.1	- - - - Other cardiac sounds	21	CH
MC84	- - - Cardiovascular pain	21	OO
MC85	- - - Gangrene	21	OO
MC86	- - - Precordial pain	21	OO
MC87	- - - Pressure or tightness of heart	21	OO
MC88	- - - Prominent veins	21	OO
MC8Y	- - - Other specified symptoms or signs involving the circulatory system	21	OO
MC90	- - Clinical findings on diagnostic imaging of heart or coronary circulation	21	CH
MC91	- - Results of function studies of the circulatory system	21	OO
MC9Y	- - Other specified symptoms, signs or clinical findings of the circulatory system	21	OO
0	- Symptoms, signs or clinical findings of the respiratory system	21	OO
0	- - Symptoms or signs involving the respiratory system	21	OO
MD10	- - - Abnormal sputum	21	HE
MD11	- - - Abnormalities of breathing	21	HE
MD11.0	- - - - Apnoea	21	HE
MD11.1	- - - - Asphyxia	21	HE
MD11.2	- - - - Ataxic breathing	21	HE
MD11.3	- - - - Breath holding	21	HE
MD11.4	- - - - Sleep related Cheyne-Stokes respiration	21	HE
MD11.5	- - - - Dyspnoea	21	HE
MD11.6	- - - - Hiccough	21	HE
MD11.7	- - - - Hyperventilation	21	HE
MD11.8	- - - - Mouth breathing	21	HE
MD11.80	- - - - - Stertor	21	HE
MD11.8Y	- - - - - Other specified mouth breathing	21	HE
MD11.8Z	- - - - - Mouth breathing, unspecified	21	HE
MD11.9	- - - - Nasal congestion	21	HE
MD11.A	- - - - Sneezing	21	HE
MD11.B	- - - - Stridor	21	HE
MD11.C	- - - - Wheezing	21	HE
MD11.D	- - - - Yawning	21	HE
MD11.Y	- - - - Other specified abnormalities of breathing	21	HE
MD11.Z	- - - - Abnormalities of breathing, unspecified	21	HE
MD12	- - - Cough	21	HE
0	- - - Haemorrhage from respiratory passages	21	CH
MD20	- - - - Epistaxis	21	HE
MD21	- - - - Haemorrhage from throat	21	NE
MD22	- - - - Haemoptysis	21	CH
MD23	- - - - Haemorrhage from other sites in respiratory passages	21	CH
MD24	- - - - Acute idiopathic pulmonary haemorrhage in infants over 28 days of age	21	CH
MD2Z	- - - - Haemorrhage from respiratory passages, unspecified	21	CH
MD30	- - - Pain in throat or chest	21	CH
MD30.0	- - - - Chest pain on breathing	21	CH
MD30.1	- - - - Other chest pain	21	CH
MD30.Z	- - - - Chest pain, unspecified	21	CH
MD31	- - - Pleurisy	21	CH
MD32	- - - Rales	21	CH
MD33	- - - Respiratory arrest	21	CH
MD34	- - - Symptom or complaint of the nose	21	HE
MD35	- - - Symptom or complaint of the sinus	21	HE
MD36	- - - Symptom or complaint of the throat	21	NE
MD36.0	- - - - Pain in throat	21	NE
MD36.Y	- - - - Other specified symptom or complaint of the throat	21	NE
MD36.Z	- - - - Symptom or complaint of the throat, unspecified	21	NE
MD3Y	- - - Other specified symptoms or signs involving the respiratory system	21	HE
0	- - Clinical findings in the respiratory system	21	HE
MD40	- - - Clinical findings in specimens from respiratory organs and thorax	21	CH
MD40.0	- - - - Abnormal level of enzymes in specimens from respiratory organs and thorax	21	CH
MD40.1	- - - - Abnormal level of hormones in specimens from respiratory organs and thorax	21	CH
MD40.2	- - - - Abnormal level of drugs, medicaments and biological substances in specimens from respiratory organs and thorax	21	CH
MD40.3	- - - - Abnormal level of substances chiefly nonmedicinal as to source in specimens from respiratory organs and thorax	21	CH
MD40.4	- - - - Abnormal immunological findings in specimens from respiratory organs and thorax	21	CH
MD40.5	- - - - Abnormal microbiological findings in specimens from respiratory organs and thorax	21	CH
MD40.50	- - - - - Positive culture from nose	21	HE
MD40.51	- - - - - Positive sputum culture	21	HE
MD40.52	- - - - - Positive throat culture	21	NE
MD40.5Y	- - - - - Other specified abnormal microbiological findings in specimens from respiratory organs and thorax	21	CH
MD40.5Z	- - - - - Abnormal microbiological findings in specimens from respiratory organs and thorax, unspecified	21	CH
MD40.6	- - - - Abnormal cytological findings in specimens from respiratory organs and thorax	21	CH
MD40.7	- - - - Abnormal histological findings in specimens from respiratory organs and thorax	21	CH
MD40.Y	- - - - Other specified clinical findings in specimens from respiratory organs and thorax	21	CH
MD41	- - - Clinical findings on diagnostic imaging of lung	21	CH
MD42	- - - Results of function studies of the respiratory system	21	CH
MD4Y	- - - Other specified clinical findings in the respiratory system	21	CH
MD6Y	- - Other specified symptoms, signs or clinical findings of the respiratory system	21	CH
0	- Symptoms, signs or clinical findings of the digestive system or abdomen	21	AB
0	- - Symptoms or signs involving the digestive system or abdomen	21	AB
MD80	- - - Symptoms or signs of the orofacial complex	21	HE
MD80.0	- - - - Symptom or complaint of the teeth or gum	21	HE
MD80.1	- - - - Symptom or complaint of the mouth, tongue or lip	21	HE
MD80.Y	- - - - Other specified symptoms or signs of the orofacial complex	21	HE
MD81	- - - Abdominal or pelvic pain	21	AB
MD81.0	- - - - Abdominal tenderness	21	AB
MD81.1	- - - - Localised abdominal pain	21	AB
MD81.10	- - - - - Pain localised to upper abdomen	21	AB
MD81.11	- - - - - Pelvic or perineal pain	21	AB
MD81.12	- - - - - Pain localised to other parts of lower abdomen	21	AB
MD81.1Z	- - - - - Localised abdominal pain, unspecified	21	AB
MD81.2	- - - - Generalised abdominal pain	21	AB
MD81.3	- - - - Acute abdomen	21	AB
MD81.4	- - - - Other and unspecified abdominal pain	21	AB
MD82	- - - Intra-abdominal or pelvic swelling, mass or lump	21	AB
0	- - - Symptoms related to the upper gastrointestinal tract	21	AB
MD90	- - - - Nausea or vomiting	21	AB
MD90.0	- - - - - Nausea	21	AB
MD90.1	- - - - - Vomiting	21	AB
MD91	- - - - Belching	21	AB
MD92	- - - - Dyspepsia	21	AB
MD93	- - - - Dysphagia	21	HE
MD94	- - - - Halitosis	21	HE
MD95	- - - - Heartburn	21	AB
MD9Y	- - - - Other specified symptoms related to the upper gastrointestinal tract	21	AB
0	- - - Symptoms related to the lower gastrointestinal tract or abdomen	21	AB
ME00	- - - - Abdominal compartment syndrome	21	AB
ME01	- - - - Abdominal distension	21	AB
ME02	- - - - Abdominal rigidity	21	AB
ME03	- - - - Abnormal bowel sounds	21	AB
ME03.0	- - - - - Hyperactive bowel sounds	21	AB
ME03.1	- - - - - Absent bowel sounds	21	AB
ME03.Z	- - - - - Abnormal bowel sounds, unspecified	21	AB
ME04	- - - - Ascites	21	AB
ME04.0	- - - - - Fluid in peritoneal cavity	21	AB
ME04.Y	- - - - - Other specified ascites	21	AB
ME04.Z	- - - - - Ascites, unspecified	21	AB
ME05	- - - - Change in bowel habit	21	AB
ME05.0	- - - - - Constipation	21	AB
ME05.1	- - - - - Diarrhoea	21	AB
ME05.Z	- - - - - Other and unspecified change in bowel habit	21	AB
ME06	- - - - Chronic enteritis of uncertain aetiology	21	AB
ME07	- - - - Faecal incontinence	21	AB
ME07.0	- - - - - Faecal smearing	21	AB
ME07.1	- - - - - Incomplete defaecation	21	AB
ME07.2	- - - - - Faecal urgency	21	AB
ME07.Y	- - - - - Other specified faecal incontinence	21	AB
ME07.Z	- - - - - Faecal incontinence, unspecified	21	AB
ME08	- - - - Flatulence and related conditions	21	AB
ME09	- - - - Rectal tenesmus	21	AB
ME0A	- - - - Visible peristalsis	21	AB
ME0B	- - - - Problems with defaecation, not otherwise specified	21	AB
ME0Y	- - - - Other specified symptoms related to the lower gastrointestinal tract or abdomen	21	AB
ME10	- - - Abnormalities related to hepatobiliary system	21	AB
ME10.0	- - - - Hepatomegaly or splenomegaly	21	AB
ME10.00	- - - - - Hepatomegaly, not elsewhere classified	21	AB
ME10.01	- - - - - Splenomegaly, not elsewhere classified	21	AB
ME10.02	- - - - - Hepatomegaly with splenomegaly	21	AB
ME10.1	- - - - Unspecified jaundice	21	AB
ME1Y	- - - Other specified symptoms or signs involving the digestive system or abdomen	21	AB
0	- - Clinical findings in the digestive system	21	AB
ME20	- - - Clinical findings in specimens from digestive organs or abdominal cavity	21	AB
ME20.0	- - - - Abnormal level of enzymes in specimens from digestive organs or abdominal cavity	21	AB
ME20.1	- - - - Abnormal level of hormones in specimens from digestive organs or abdominal cavity	21	AB
ME20.2	- - - - Abnormal level of drugs, medicaments or biological substances in specimens from digestive organs of abdominal cavity	21	AB
ME20.3	- - - - Abnormal level of substances chiefly nonmedicinal as to source in specimens from digestive organs and abdominal cavity	21	AB
ME20.4	- - - - Abnormal immunological findings in specimens from digestive organs and abdominal cavity	21	AB
ME20.5	- - - - Abnormal microbiological findings in specimens from digestive organs and abdominal cavity	21	AB
ME20.6	- - - - Abnormal cytological findings in specimens from digestive organs and abdominal cavity	21	AB
ME20.7	- - - - Abnormal histological findings in specimens from digestive organs and abdominal cavity	21	AB
ME20.Y	- - - - Other specified clinical findings in specimens from digestive organs or abdominal cavity	21	AB
ME20.Z	- - - - Clinical findings in specimens from digestive organs or abdominal cavity, unspecified	21	AB
ME21	- - - Clinical findings on diagnostic imaging of liver or biliary tract	21	AB
ME22	- - - Clinical findings on diagnostic imaging of digestive tract	21	AB
ME23	- - - Results of function studies of the digestive system	21	AB
ME24	- - - Clinical manifestations of the digestive system	21	AB
ME24.0	- - - - Digestive system abscess	21	AB
ME24.1	- - - - Digestive system fistula	21	AB
ME24.2	- - - - Digestive system obstruction	21	AB
ME24.3	- - - - Digestive system perforation	21	AB
ME24.30	- - - - - Perforation of small intestine	21	AB
ME24.31	- - - - - Perforation of large intestine	21	AB
ME24.32	- - - - - Perforation of cystic duct	21	AB
ME24.33	- - - - - Perforation of gallbladder	21	AB
ME24.34	- - - - - Perforation of bile duct	21	AB
ME24.3Y	- - - - - Other specified digestive system perforation	21	AB
ME24.3Z	- - - - - Digestive system perforation, unspecified	21	AB
ME24.4	- - - - Digestive system stenosis	21	AB
ME24.5	- - - - Digestive system ulcer	21	AB
ME24.6	- - - - Digestive system dilatation	21	AB
ME24.7	- - - - Digestive system incarceration	21	AB
ME24.8	- - - - Digestive system strangulation or gangrene	21	AB
ME24.9	- - - - Gastrointestinal bleeding	21	AB
ME24.90	- - - - - Acute gastrointestinal bleeding, not elsewhere classified	21	AB
ME24.91	- - - - - Chronic gastrointestinal bleeding, not elsewhere classified	21	AB
ME24.9Z	- - - - - Gastrointestinal bleeding, unspecified	21	AB
ME24.A	- - - - Other digestive system haemorrhage, not elsewhere classified	21	AB
ME24.A0	- - - - - Obscure gastrointestinal bleeding	21	AB
ME24.A1	- - - - - Haemorrhage of anus and rectum	21	AB
ME24.A2	- - - - - Oesophageal haemorrhage	21	AB
ME24.A3	- - - - - Haematochezia	21	AB
ME24.A4	- - - - - Melaena	21	AB
ME24.A5	- - - - - Haematemesis	21	AB
ME24.A6	- - - - - Positive occult blood in stool	21	AB
ME24.Y	- - - - Other specified clinical manifestations of the digestive system	21	AB
ME2Y	- - - Other specified clinical findings in the digestive system	21	AB
ME4Y	- - Other specified symptoms, signs or clinical findings of the digestive system or abdomen	21	AB
0	- Symptoms, signs or clinical findings involving the skin	21	OO
0	- - Symptom or signs involving the skin	21	OO
ME60	- - - Skin lesion of uncertain or unspecified nature	21	OO
ME60.0	- - - - Skin lesion of uncertain nature	21	OO
ME60.1	- - - - Pigmented skin lesion of uncertain nature	21	OO
ME60.2	- - - - Ulcer of skin of uncertain nature	21	OO
ME60.3	- - - - Keratosis of skin of uncertain or unspecified nature	21	OO
ME60.Z	- - - - Skin lesion of unspecified nature	21	OO
ME61	- - - Subcutaneous swelling, mass or lump of uncertain or unspecified nature	21	OO
ME62	- - - Acute skin eruption of uncertain or unspecified nature	21	OO
ME62.0	- - - - Acute erythematous skin eruption	21	OO
ME62.1	- - - - Acute purpuric skin eruption	21	OO
ME62.2	- - - - Acute urticarial skin eruption	21	OO
ME62.3	- - - - Acute maculopapular skin eruption	21	OO
ME62.4	- - - - Acute papular skin eruption	21	OO
ME62.5	- - - - Acute exudative skin eruption	21	OO
ME62.6	- - - - Acute blistering skin eruption	21	OO
ME62.7	- - - - Acute desquamating skin eruption	21	OO
ME62.8	- - - - Acute discoid or annular skin eruption	21	OO
ME62.9	- - - - Acute excoriation of skin	21	OO
ME62.Y	- - - - Other specified acute skin eruption of uncertain or unspecified nature	21	OO
ME63	- - - Chronic skin disorder of uncertain or unspecified nature	21	OO
ME63.0	- - - - Chronic erythematous skin disorder	21	OO
ME63.1	- - - - Chronic urticarial skin disorder	21	OO
ME63.2	- - - - Chronic papular skin disorder	21	OO
ME63.3	- - - - Chronic blistering skin disorder	21	OO
ME63.4	- - - - Chronic scaling or hyperkeratotic skin disorder	21	OO
ME63.5	- - - - Chronic lichenified skin disorder	21	OO
ME63.6	- - - - Chronic discoid or annular skin disorder	21	OO
ME63.7	- - - - Chronic excoriation of skin	21	OO
ME64	- - - Non-specific cutaneous vascular signs	21	OO
ME64.0	- - - - Erythema	21	OO
ME64.1	- - - - Cyanosis	21	OO
ME64.2	- - - - Pallor	21	OO
ME64.3	- - - - Petechiae	21	OO
ME64.4	- - - - Flushing	21	OO
ME65	- - - Disturbances of skin sensation of unspecified aetiology	21	OO
ME65.0	- - - - Burning of skin	21	OO
ME65.1	- - - - Itching of skin	21	OO
ME65.2	- - - - Pain or tenderness of skin	21	OO
ME65.3	- - - - Stinging of skin	21	OO
ME65.4	- - - - Tingling of skin	21	OO
ME65.Y	- - - - Other specified disturbance of skin sensation	21	OO
ME66	- - - Miscellaneous non-specific skin-related symptoms and signs	21	OO
ME66.0	- - - - Abnormal sensitivity to light or UV radiation of uncertain or unspecified nature	21	OO
ME66.1	- - - - Changes in skin texture	21	OO
ME66.2	- - - - Excess and redundant skin	21	OO
ME66.3	- - - - Symptom or complaint relating to hair or scalp	21	HE
ME66.4	- - - - Symptom or complaint relating to nails	21	HA
ME66.5	- - - - Complaint of abnormal sweating	21	OO
ME66.6	- - - - Rash	21	OO
ME66.60	- - - - - Rash localised	21	OO
ME66.61	- - - - - Rash generalised	21	OO
ME66.6Y	- - - - - Other specified rash	21	OO
ME66.6Z	- - - - - Rash, unspecified	21	OO
ME66.Y	- - - - Other specified skin changes	21	OO
ME67	- - - Skin disorder of uncertain or unspecified nature	21	OO
ME6Y	- - - Other specified symptom or signs involving the skin	21	OO
0	- Symptoms, signs or clinical findings of the musculoskeletal system	21	OO
0	- - Symptoms or signs of the musculoskeletal system	21	OO
ME80	- - - Clicking hip	21	TH	34	20	TH.34.20
ME81	- - - Musculoskeletal chest pain	21	CH
ME81.0	- - - - Intercostal pain	21	CH
ME81.Y	- - - - Other specified musculoskeletal chest pain	21	CH
ME81.Z	- - - - Musculoskeletal chest pain, unspecified	21	CH
ME82	- - - Pain in joint	21	OO
ME83	- - - Rheumatism, unspecified	21	OO
ME84	- - - Spinal pain	21	NE/TS/LS
ME84.0	- - - - Cervical spine pain	21	NE
ME84.1	- - - - Thoracic spine pain	21	TS
ME84.2	- - - - Low back pain	21	LS
ME84.20	- - - - - Lumbago with sciatica	21	LS	83	83
ME84.2Y	- - - - - Other specified low back pain	21	LS
ME84.2Z	- - - - - Low back pain, unspecified	21	LS
ME84.3	- - - - Sciatica	21	LS	20	40
ME84.Z	- - - - Spinal pain, unspecified	21	NE/TS/LS
ME85	- - - Stiffness of joint	21	OO	83	83	OO.83.83
ME86	- - - Symptom or complaint of a body part	21	OO	83	83	OO.83.83
ME86.0	- - - - Symptom or complaint of the ankle	21	AN	83	83
ME86.1	- - - - Symptom or complaint of the arm	21	AR	83	83
ME86.2	- - - - Symptom or complaint of the back	21	TS/LS	83	83
ME86.20	- - - - - Back syndrome without radiating pain	21	TS/LS
ME86.21	- - - - - Back syndrome with radiating pain	21	TS/LS
ME86.22	- - - - - Symptom or complaint of the low back	21	LS	83	83	LS.83.83
ME86.2Y	- - - - - Other specified symptom or complaint of the back	21	TS/LS	83	83
ME86.2Z	- - - - - Symptom or complaint of the back, unspecified	21	TS/LS	83	83
ME86.3	- - - - Symptom or complaint of the chest	21	CH	83	83
ME86.4	- - - - Symptom or complaint of the elbow	21	EL	83	83
ME86.5	- - - - Symptom or complaint of the flank or axilla	21	SH	83	83
ME86.6	- - - - Symptom or complaint of the foot or toe	21	FO	83	83
ME86.7	- - - - Symptom or complaint of the hand or finger	21	HA	83	83
ME86.8	- - - - Symptom or complaint of the hip	21	HI	83	83
ME86.9	- - - - Symptom or complaint of the jaw	21	HE	83	83
ME86.A	- - - - Symptom or complaint of the knee	21	KN	83	83
ME86.B	- - - - Symptom or complaint of the leg or thigh	21	TH	83	83
ME86.C	- - - - Symptom or complaint of the neck	21	NE	83	83
ME86.D	- - - - Symptom or complaint of the shoulder	21	SH	83	83
ME86.D0	- - - - - Shoulder syndrome	21	SH	83	83	SH.83.83
ME86.DY	- - - - - Other specified symptom or complaint of the shoulder	21	SH	83	83	SH.83.83
ME86.DZ	- - - - - Symptom or complaint of the shoulder, unspecified	21	SH	83	83	SH.83.83
ME86.E	- - - - Symptom or complaint of the wrist	21	WR	83	83
ME86.F	- - - - Symptom or complaint of joint, not otherwise specified	21	OO	83	83	OO.83.83
ME86.G	- - - - Symptom or complaint of muscle, not otherwise specified	21	OO	83	83	OO.83.83
ME86.Y	- - - - Problem of other specified body part	21	OO	83	83	OO.83.83
ME86.Z	- - - - Problem of unspecified body part	21	OO	83	83	OO.83.83
ME8Y	- - - Other specified symptoms or signs of the musculoskeletal system	21	OO	83	83	OO.83.83
0	- - Clinical findings in the musculoskeletal system	21	OO	83	83	OO.83.83
ME90	- - - Clinical findings on diagnostic imaging of skull and head	21	HE	83	83	HE.83.83
ME91	- - - Clinical findings on diagnostic imaging of limbs	21	AR/FA/TH/LE	83	83
ME92	- - - Clinical findings on diagnostic imaging of other parts of musculoskeletal system	21	OO	83	83	OO.83.83
ME92.0	- - - - Wedging of vertebra	21	NE/TS/LS	83	83
ME92.1	- - - - Bony erosion	21	OO	83	83	OO.83.83
ME92.Y	- - - - Other specified clinical findings on diagnostic imaging of other parts of musculoskeletal system	21	OO	83	83	OO.83.83
ME92.Z	- - - - Clinical findings on diagnostic imaging of other parts of musculoskeletal system, unspecified	21	OO	83	83	OO.83.83
ME93	- - - Biomechanical lesions, not elsewhere classified	21	OO	83	83	OO.83.83
ME93.0	- - - - Segmental and somatic dysfunction	21	OO	83	83	OO.83.83
ME93.1	- - - - Subluxation stenosis of neural canal	21	NE/TS/LS	20	40
ME93.2	- - - - Osseous stenosis of neural canal	21	NE/TS/LS	20	40
ME93.3	- - - - Connective tissue stenosis of neural canal	21	NE/TS/LS	20	40
ME93.4	- - - - Intervertebral disc stenosis of neural canal	21	NE/TS/LS	20	40
ME93.40	- - - - - Intervertebral disc stenosis of neural canal, head region	21	NE	40	21	NE.40.21
ME93.41	- - - - - Intervertebral disc stenosis of neural canal, cervical region	21	NE	40	21	NE.40.21
ME93.42	- - - - - Intervertebral disc stenosis of neural canal, thoracic region	21	TS	20	40	TS.20.40
ME93.43	- - - - - Intervertebral disc stenosis of neural canal, lumbar region	21	LS	31	00	LS.31.00
ME93.44	- - - - - Intervertebral disc stenosis of neural canal, sacral region	21	LS	20	40	LS.20.40
ME93.45	- - - - - Intervertebral disc stenosis of neural canal, pelvic region	21	LS	20	40	LS.20.40
ME93.46	- - - - - Intervertebral disc stenosis of neural canal, lower extremity	21	LS	20	40	LS.20.40
ME93.47	- - - - - Intervertebral disc stenosis of neural canal, upper extremity	21	NE	40	21	NE.40.21
ME93.48	- - - - - Intervertebral disc stenosis of neural canal, rib cage	21	TS	20	40	TS.20.40
ME93.4Y	- - - - - Other specified intervertebral disc stenosis of neural canal	21	NE/TS/LS	20	40
ME93.4Z	- - - - - Intervertebral disc stenosis of neural canal, unspecified	21	NE/TS/LS	20	40
ME93.5	- - - - Osseous and subluxation stenosis of intervertebral foramina	21	NE/TS/LS	83	83
ME93.6	- - - - Connective tissue and disc stenosis of intervertebral foramina	21	NE/TS/LS	83	83
ME93.Y	- - - - Other specified biomechanical lesions, not elsewhere classified	21	NE/TS/LS	83	83
ME93.Z	- - - - Biomechanical lesions, unspecified	21	NE/TS/LS	83	83
ME9Y	- - - Other specified clinical findings in the musculoskeletal system	21	OO	83	83	OO.83.83
MF1Y	- - Other specified symptoms, signs or clinical findings of the musculoskeletal system	21	OO	83	83	OO.83.83
0	- Symptoms, signs or clinical findings of the genitourinary system	21
0	- - Symptoms, signs or clinical findings involving the female genital system	21	AB
MF30	- - - Breast lump or mass female	21	CH
MF31	- - - Breast or lactation symptom or complaint	21	CH
MF32	- - - Menopausal symptom or complaint	21	AB
MF33	- - - Premenstrual symptom or complaint	21	AB
MF34	- - - Pregnancy symptom or complaint	21	AB
MF35	- - - Postpartum symptom or complaint	21	AB
MF36	- - - Other symptom or complaint of vagina	21	AB
MF37	- - - Symptom or complaint of female nipple	21	CH
MF38	- - - Symptom or complaint of female pelvis	21	AB
MF39	- - - Symptom or complaint of the vulva	21	AB
MF3A	- - - Vaginal discharge	21	AB
MF3Y	- - - Other specified symptoms, signs or clinical findings involving the female genital system	21	AB
0	- - Symptoms, signs or clinical findings involving the male genital system	21
MF40	- - - Problems of male genital organs	21
MF40.0	- - - - Symptom or complaint of the penis	21	HI
MF40.00	- - - - - Pain in penis	21	HI
MF40.0Y	- - - - - Other specified symptom or complaint of the penis	21	HI
MF40.0Z	- - - - - Symptom or complaint of the penis, unspecified	21	HI
MF40.1	- - - - Problems of the prostate	21	AB
MF40.2	- - - - Symptom or complaint of the scrotum or testis	21	HI
MF40.20	- - - - - Acute scrotal pain	21	HI
MF40.21	- - - - - Testicular pain	21	HI
MF40.2Y	- - - - - Other specified symptom or complaint of the scrotum or testis	21	HI
MF40.2Z	- - - - - Symptom or complaint of the scrotum or testis, unspecified	21	HI
MF40.3	- - - - Retrograde ejaculation	21	HI
MF40.Y	- - - - Other specified problems of male genital organs	21
MF40.Z	- - - - Problems of male genital organs, unspecified	21
MF41	- - - Symptom or complaint of male sexual function	21
MF42	- - - Retractile testis migrans	21	HI
MF4Y	- - - Other specified symptoms, signs or clinical findings involving the male genital system	21
0	- - Symptoms, signs or clinical findings involving the urinary system	21	AB
MF50	- - - Abnormal micturition	21	AB
MF50.0	- - - - Frequent micturition	21	AB
MF50.1	- - - - Pollakiuria	21	AB
MF50.2	- - - - Urinary incontinence	21	AB
MF50.20	- - - - - Stress incontinence	21	AB
MF50.21	- - - - - Urge Incontinence	21	AB
MF50.22	- - - - - Mixed incontinence	21	AB
MF50.23	- - - - - Functional urinary incontinence	21	AB
MF50.24	- - - - - Reflex incontinence	21	AB
MF50.2Y	- - - - - Other specified urinary incontinence	21	AB
MF50.2Z	- - - - - Urinary incontinence, unspecified	21	AB
MF50.3	- - - - Retention of urine	21	AB
MF50.4	- - - - Haematuria	21	AB
MF50.40	- - - - - Macroscopic haematuria	21	AB
MF50.41	- - - - - Microscopic haematuria	21	AB
MF50.4Z	- - - - - Haematuria, unspecified	21	AB
MF50.5	- - - - Extravasation of urine	21	AB
MF50.6	- - - - Other difficulties with micturition	21	AB
MF50.60	- - - - - Hesitancy of micturition	21	AB
MF50.61	- - - - - Poor urinary stream	21	AB
MF50.62	- - - - - Splitting of urinary stream	21	AB
MF50.63	- - - - - Urgency of urination	21	AB
MF50.64	- - - - - Feeling of incomplete bladder emptying	21	AB
MF50.65	- - - - - Straining to void	21	AB
MF50.6Y	- - - - - Other specified difficulties with micturition	21	AB
MF50.6Z	- - - - - Difficulties with micturition, unspecified	21	AB
MF50.7	- - - - Dysuria	21	AB
MF50.8	- - - - Vesical tenesmus	21	AB
MF50.Y	- - - - Other specified abnormal micturition	21	AB
MF50.Z	- - - - Abnormal micturition, unspecified	21	AB
MF51	- - - Anuria or oliguria	21	AB
MF52	- - - Bladder pain	21	AB
MF53	- - - Extrarenal uraemia	21	AB
MF54	- - - Macroscopic changes of size of the kidney	21	AB
MF54.0	- - - - Smooth contracted kidney	21	AB
MF54.1	- - - - Irregularly contracted kidney	21	AB
MF54.2	- - - - Small kidney	21	AB
MF54.Y	- - - - Other specified macroscopic changes of size of the kidney	21	AB
MF54.Z	- - - - Macroscopic changes of size of the kidney, unspecified	21	AB
MF55	- - - Polyuria	21	AB
MF56	- - - Renal colic	21	AB
MF57	- - - Symptom or complaint of bladder	21	AB
MF58	- - - Urethral discharge	21	AB
MF59	- - - Urinary symptom or complaint	21	AB
MF5Y	- - - Other specified symptoms, signs or clinical findings involving the urinary system	21	AB
0	- - Clinical findings in specimens from female genital organs	21	AB
MF60	- - - Abnormal level of enzymes in specimens from female genital organs	21	AB
MF61	- - - Abnormal level of hormones in specimens from female genital organs	21	AB
MF62	- - - Abnormal level of drugs, medicaments and biological substances in specimens from female genital organs	21	AB
MF63	- - - Abnormal level of substances chiefly nonmedicinal as to source in specimens from female genital organs	21	AB
MF64	- - - Abnormal immunological findings in specimens from female genital organs	21	AB
MF65	- - - Abnormal microbiological findings in specimens from female genital organs	21	AB
MF66	- - - Abnormal cytological findings in specimens from female genital organs	21	AB
MF66.0	- - - - Abnormal cervix smear	21	AB
MF66.Y	- - - - Other specified abnormal cytological findings in specimens from female genital organs	21	AB
MF66.Z	- - - - Abnormal cytological findings in specimens from female genital organs, unspecified	21	AB
MF67	- - - Abnormal histological findings in specimens from female genital organs	21	AB
MF68	- - - Abnormal chromosomal findings in specimens from female genital organs	21	AB
MF6Y	- - - Other specified clinical findings in specimens from female genital organs	21	AB
MF6Z	- - - Clinical findings in specimens from female genital organs, unspecified	21	AB
0	- - Clinical findings in specimens from male genital organs	21
MF70	- - - Abnormal level of enzymes in specimens from male genital organs	21
MF71	- - - Abnormal level of hormones in specimens from male genital organs	21
MF72	- - - Abnormal level of drugs, medicaments and biological substances in specimens from male genital organs	21
MF73	- - - Abnormal level of substances chiefly nonmedicinal as to source in specimens from male genital organs	21
MF74	- - - Abnormal immunological findings in specimens from male genital organs	21
MF75	- - - Abnormal microbiological findings in specimens from male genital organs	21
MF76	- - - Abnormal cytological findings in specimens from male genital organs	21
MF77	- - - Abnormal histological findings in specimens from male genital organs	21
MF78	- - - Abnormal chromosomal findings in specimens from male genital organs	21
MF7Y	- - - Other specified clinical findings in specimens from male genital organs	21
MF7Z	- - - Clinical findings in specimens from male genital organs, unspecified	21
0	- - Clinical findings in specimens from the urinary system	21	AB
MF80	- - - Diffuse mesangial sclerosis	21	AB
MF81	- - - Fibronectin glomerulopathy	21	AB
MF82	- - - Lipoprotein glomerulopathy	21	AB
MF83	- - - Diabetic glomerular changes	21	AB
MF84	- - - Pauci-immune proliferative glomerulonephritis	21	AB
MF85	- - - Anti-glomerular basement membrane antibody mediated disease	21	AB
MF8Y	- - - Other specified clinical findings in specimens from the urinary system	21	AB
MF8Z	- - - Clinical findings in specimens from the urinary system, unspecified	21	AB
0	- - Clinical findings on examination of urine, without diagnosis	21	AB
MF90	- - - Acetonuria	21	AB
MF91	- - - Bilirubinuria	21	AB
MF92	- - - Chyluria	21	AB
MF93	- - - Glycosuria	21	AB
MF94	- - - Haemoglobinuria	21	AB
MF95	- - - Myoglobinuria	21	AB
MF96	- - - Proteinuria	21	AB
MF96.0	- - - - Orthostatic proteinuria	21	AB
MF96.1	- - - - Bence Jones proteinuria	21	AB
MF96.Y	- - - - Other specified proteinuria	21	AB
MF96.Z	- - - - Proteinuria, unspecified	21	AB
MF97	- - - Pyuria	21	AB
MF98	- - - Abnormal levels of serum electrolytes in the urine	21	AB
MF98.0	- - - - Hypercalciuria	21	AB
MF98.1	- - - - Hyperkaluria	21	AB
MF98.2	- - - - Hypermagnesuria	21	AB
MF98.3	- - - - Hypocalciuria	21	AB
MF98.4	- - - - Hypokaluria	21	AB
MF98.5	- - - - Hypomagnesuria	21	AB
MF98.6	- - - - Hypophosphaturia	21	AB
MF98.Y	- - - - Other specified abnormal levels of serum electrolytes in the urine	21	AB
MF98.Z	- - - - Abnormal levels of serum electrolytes in the urine, unspecified	21	AB
MF99	- - - Elevated urine levels of drugs, medicaments and biological substances	21	AB
MF9A	- - - Abnormal urine levels of substances chiefly nonmedicinal as to source	21	AB
MF9B	- - - Abnormal findings on microbiological examination of urine	21	AB
MF9C	- - - Abnormal findings on cytological and histological examination of urine	21	AB
MF9Y	- - - Other specified clinical findings on examination of urine, without diagnosis	21	AB
MG00	- - Clinical findings on diagnostic imaging of breast	21	CH
MG01	- - Clinical findings on diagnostic imaging of urinary organs	21	AB
MG02	- - Results of kidney function studies	21	AB
MG0Y	- - Other specified symptoms, signs or clinical findings of the genitourinary system	21	AB
0	- General symptoms, signs or clinical findings	21	OO
0	- - General symptoms	21	OO
MG20	- - - Cachexia	21	OO
MG20.0	- - - - Malignant cachexia	21	OO
MG20.Z	- - - - Cachexia, unspecified	21	OO
MG21	- - - Chills	21	OO	83	83	OO.83.83
MG22	- - - Fatigue	21	OO
MG23	- - - Fear of death or dying	21	OO
MG24	- - - Fear of disease	21	OO
MG24.0	- - - - Fear of cancer	21	OO
MG24.00	- - - - - Fear of cancer of digestive system	21	AB
MG24.01	- - - - - Fear of breast cancer female	21	CH
MG24.02	- - - - - Fear of genital cancer male	21	AB
MG24.0Y	- - - - - Other specified fear of cancer	21	OO
MG24.0Z	- - - - - Fear of cancer, unspecified	21	OO
MG24.1	- - - - Fear of human immunodeficiency virus	21	OO
MG24.2	- - - - Fear of haematological disease	21	OO
MG24.3	- - - - Fear of digestive disease	21	AB
MG24.4	- - - - Fear of eye disease	21	HE
MG24.5	- - - - Fear of heart disease	21	CH
MG24.6	- - - - Fear of hypertension	21	CH
MG24.7	- - - - Fear of cardiovascular disease	21	CH
MG24.8	- - - - Fear of musculoskeletal disease	21	OO
MG24.9	- - - - Fear of neurological disease	21	OO
MG24.A	- - - - Fear of respiratory disease	21	CH
MG24.B	- - - - Fear of endocrine, metabolic or nutritional disease	21	OO
MG24.C	- - - - Fear of urinary disease	21	AB
MG24.D	- - - - Fear of complications of pregnancy	21	AB
MG24.E	- - - - Fear of sexually transmitted disease female	21	AB
MG24.F	- - - - Fear of female genital or breast disease	21
MG24.G	- - - - Fear of sexually transmitted disease male	21
MG24.H	- - - - Fear of genital disease male	21
MG24.J	- - - - Fear of mental disorder	21	HE
MG24.Y	- - - - Fear of other specified disease	21	OO
MG24.Z	- - - - Fear of disease, unspecified	21	OO
MG25	- - - Feeling ill	21	OO
MG26	- - - Fever of other or unknown origin	21	OO	83	83	OO.83.83
MG27	- - - Haemorrhage, not elsewhere classified	21	OO
MG28	- - - Hypothermia, not associated with low environmental temperature	21	OO	83	83	OO.83.83
MG29	- - - Oedema	21	OO
MG29.0	- - - - Localised oedema	21	OO
MG29.00	- - - - - Ankle oedema	21	AN
MG29.01	- - - - - Oedema of legs	21
MG29.02	- - - - - Pitting of lip	21	HE
MG29.0Y	- - - - - Other specified localised oedema	21	OO
MG29.1	- - - - Generalised oedema	21	OO
MG29.10	- - - - - Oedema due to increased capillary pressure	21	OO
MG29.1Y	- - - - - Other specified generalised oedema	21	OO
MG29.2	- - - - Infectious oedema	21	OO
MG29.3	- - - - Pitting oedema	21	OO
MG29.Z	- - - - Oedema, unspecified	21	OO
MG2A	- - - Old age	21	OO
0	- - - Pain	21	OO
MG30	- - - - Chronic pain	21	OO
MG30.0	- - - - - Chronic primary pain	21	OO
MG30.00	- - - - - - Chronic primary visceral pain	21	AB
MG30.01	- - - - - - Chronic widespread pain	21	OO
MG30.02	- - - - - - Chronic primary musculoskeletal pain	21	OO
MG30.03	- - - - - - Chronic primary headache or orofacial pain	21	HE
MG30.0Y	- - - - - - Other specified chronic primary pain	21	OO
MG30.0Z	- - - - - - Chronic primary pain, unspecified	21	OO
MG30.1	- - - - - Chronic cancer related pain	21	OO
MG30.10	- - - - - - Chronic cancer pain	21	OO
MG30.11	- - - - - - Chronic post cancer treatment pain	21	OO
MG30.1Y	- - - - - - Other specified chronic cancer related pain	21	OO
MG30.1Z	- - - - - - Chronic cancer related pain, unspecified	21	OO
MG30.2	- - - - - Chronic postsurgical or post traumatic pain	21	OO
MG30.20	- - - - - - Chronic post traumatic pain	21	OO
MG30.21	- - - - - - Chronic postsurgical pain	21	OO
MG30.2Y	- - - - - - Other specified chronic postsurgical or post traumatic pain	21	OO
MG30.2Z	- - - - - - Chronic postsurgical or post traumatic pain, unspecified	21	OO
MG30.3	- - - - - Chronic secondary musculoskeletal pain	21	OO
MG30.30	- - - - - - Chronic secondary musculoskeletal pain from persistent inflammation	21	OO
MG30.31	- - - - - - Chronic secondary musculoskeletal pain associated with structural changes	21	OO
MG30.32	- - - - - - Chronic secondary musculoskeletal pain due to disease of the nervous system	21	OO
MG30.3Y	- - - - - - Other specified chronic secondary musculoskeletal pain	21	OO
MG30.3Z	- - - - - - Chronic secondary musculoskeletal pain, unspecified	21	OO
MG30.4	- - - - - Chronic secondary visceral pain	21	AB
MG30.40	- - - - - - Chronic visceral pain from mechanical factors	21	AB
MG30.41	- - - - - - Chronic visceral pain from vascular mechanisms	21	AB
MG30.42	- - - - - - Chronic visceral pain from persistent inflammation	21	AB
MG30.4Y	- - - - - - Other specified chronic secondary visceral pain	21	AB
MG30.4Z	- - - - - - Chronic secondary visceral pain, unspecified	21	AB
MG30.5	- - - - - Chronic neuropathic pain	21	OO
MG30.50	- - - - - - Chronic central neuropathic pain	21	OO
MG30.51	- - - - - - Chronic peripheral neuropathic pain	21	OO
MG30.5Y	- - - - - - Other specified chronic neuropathic pain	21	OO
MG30.5Z	- - - - - - Chronic neuropathic pain, unspecified	21	OO
MG30.6	- - - - - Chronic secondary headache or orofacial pain	21	HE
MG30.60	- - - - - - Chronic secondary orofacial pain	21	HE
MG30.61	- - - - - - Chronic dental pain	21	HE
MG30.62	- - - - - - Chronic neuropathic orofacial pain	21	HE
MG30.63	- - - - - - Headache or orofacial pain attributed to chronic secondary temporomandibular disorders	21	HE
MG30.6Y	- - - - - - Other specified chronic secondary headache or orofacial pain	21	HE
MG30.6Z	- - - - - - Chronic secondary headache or orofacial pain, unspecified	21	HE
MG30.Y	- - - - - Other specified chronic pain	21	OO
MG30.Z	- - - - - Chronic pain, unspecified	21	OO
MG31	- - - - Acute pain	21	OO
MG31.0	- - - - - Acute pain in the face, not elsewhere classified	21	HE
MG31.1	- - - - - Acute headache, not elsewhere classified	21	HE
MG31.2	- - - - - Acute postoperative pain, not elsewhere classified	21	OO
MG31.Y	- - - - - Other specified acute pain	21	OO
MG31.Z	- - - - - Acute pain, unspecified	21	OO
MG3Z	- - - - Pain, unspecified	21	OO
MG40	- - - Shock	21	OO
MG40.0	- - - - Cardiogenic shock	21	OO
MG40.1	- - - - Hypovolaemic shock	21	OO
MG40.Y	- - - - Other specified shock	21	OO
MG40.Z	- - - - Shock, unspecified	21	OO
MG41	- - - Sleep disturbance, not elsewhere classified	21	OO
MG42	- - - Somnolence, not elsewhere classified	21	OO
MG43	- - - Symptoms and signs concerning food and fluid intake	21	OO
MG43.0	- - - - Polydipsia	21	OO
MG43.1	- - - - Overeating	21	OO
MG43.2	- - - - Abulia	21	OO
MG43.3	- - - - Feeding difficulties	21	OO
MG43.30	- - - - - Feeding problem of infant	21	OO
MG43.31	- - - - - Feeding problem of child	21	OO
MG43.32	- - - - - Feeding problem of adult	21	OO
MG43.3Z	- - - - - Feeding difficulties, unspecified	21	OO
MG43.4	- - - - Insufficient intake of food and water due to self neglect	21	OO
MG43.40	- - - - - Refusal of food, not elsewhere classified	21	OO
MG43.41	- - - - - Refusal of fluid, not elsewhere classified	21	OO
MG43.4Y	- - - - - Other specified insufficient intake of food and water due to self neglect	21	OO
MG43.4Z	- - - - - Insufficient intake of food and water due to self neglect, unspecified	21	OO
MG43.5	- - - - Excessive weight loss	21	OO
MG43.6	- - - - Excessive weight gain	21	OO
MG43.7	- - - - Anorexia	21	OO
MG43.8	- - - - Decreased appetite	21	OO
MG43.9	- - - - Increased appetite	21	OO
MG43.Y	- - - - Other specified symptoms and signs concerning food and fluid intake	21	OO
MG44	- - - Symptoms peculiar to infancy	21	OO
MG44.0	- - - - Excessive crying of infant	21	OO
MG44.1	- - - - Lack of expected normal physiological development	21	OO
MG44.10	- - - - - Delayed milestone	21	OO
MG44.11	- - - - - Failure to thrive in infant or child	21	OO
MG44.12	- - - - - Short stature of child	21	OO
MG44.13	- - - - - Constitutional delay of growth and puberty	21	OO
MG44.14	- - - - - Familial short stature	21	OO
MG44.1Y	- - - - - Other specified lack of expected normal physiological development	21	OO
MG44.1Z	- - - - - Lack of expected normal physiological development, unspecified	21	OO
MG44.Y	- - - - Other specified symptoms peculiar to infancy	21	OO
MG44.Z	- - - - Symptoms peculiar to infancy, unspecified	21	OO
MG45	- - - Syncope and collapse	21	OO
MG45.0	- - - - Cardiac syncope	21	CH
MG45.Y	- - - - Other specified syncope and collapse	21	OO
MG45.Z	- - - - Syncope and collapse, unspecified	21	OO
MG46	- - - Systemic inflammatory response syndrome of noninfectious origin	21	OO
MG47	- - - Toxicosis not further specified	21	OO
MG48	- - - Unknown and unspecified causes of morbidity	21	OO
MG4Y	- - - Other specified general symptoms	21	OO
0	- - Finding of microorganism resistant to antimicrobial drugs	21	OO
MG50	- - - Finding of gram negative bacteria resistant to antimicrobial drugs	21	OO
MG50.0	- - - - Antibiotic resistant Acinetobacter baumannii	21	OO
MG50.00	- - - - - Tetracycline resistant Acinetobacter baumannii	21	OO
MG50.01	- - - - - Aminoglycoside resistant Acinetobacter baumannii	21	OO
MG50.02	- - - - - Carbapenem resistant Acinetobacter baumannii	21	OO
MG50.03	- - - - - Polymyxin resistant Acinetobacter baumannii	21	OO
MG50.0Y	- - - - - Acinetobacter resistant to other antibiotic	21	OO
MG50.0Z	- - - - - Acinetobacter resistant to unspecified antibiotic	21	OO
MG50.1	- - - - Antibiotic resistant Campylobacter	21	OO
MG50.10	- - - - - Fluoroquinolone resistant Campylobacter	21	OO
MG50.1Y	- - - - - Other specified antibiotic resistant Campylobacter	21	OO
MG50.1Z	- - - - - Campylobacter resistant to unspecified antibiotic	21	OO
MG50.2	- - - - Antibiotic resistant Escherichia coli	21	OO
MG50.20	- - - - - Sulfonamide or trimethoprim resistant Escherichia coli	21	OO
MG50.21	- - - - - Fluoroquinolone resistant Escherichia coli	21	OO
MG50.22	- - - - - Third generation cephalosporin resistant Escherichia coli	21	OO
MG50.23	- - - - - Fourth-generation cephalosporins resistant Escherichia coli	21	OO
MG50.24	- - - - - Carbapenem resistant Escherichia coli	21	OO
MG50.25	- - - - - Polymyxin resistant Escherichia coli	21	OO
MG50.26	- - - - - Penicillin resistant Escherichia coli	21	OO
MG50.27	- - - - - Extended spectrum beta-lactamase producing Escherichia coli	21	OO
MG50.2Y	- - - - - Escherichia coli resistant to other antibiotic	21	OO
MG50.2Z	- - - - - Escherichia coli resistant to unspecified antibiotic	21	OO
MG50.3	- - - - Antibiotic resistant Haemophilus influenzae	21	OO
MG50.30	- - - - - Ampicillin resistant Haemophilus influenzae	21	OO
MG50.3Y	- - - - - Other specified antibiotic resistant Haemophilus influenzae	21	OO
MG50.3Z	- - - - - Antibiotic resistant Haemophilus influenzae, unspecified	21	OO
MG50.4	- - - - Antibiotic resistant Helicobacter pylori	21	OO
MG50.40	- - - - - Clarithromycin resistant Helicobacter pylori	21	OO
MG50.4Y	- - - - - Other specified antibiotic resistant Helicobacter pylori	21	OO
MG50.4Z	- - - - - Antibiotic resistant Helicobacter pylori, unspecified	21	OO
MG50.5	- - - - Antibiotic resistant Klebsiella pneumoniae	21	OO
MG50.50	- - - - - Sulfonamide or trimethoprim resistant Klebsiella pneumoniae	21	OO
MG50.51	- - - - - Fluoroquinolone resistant Klebsiella pneumoniae	21	OO
MG50.52	- - - - - Third-generation cephalosporin resistant Klebsiella pneumoniae	21	OO
MG50.53	- - - - - Fourth-generation cephalosporin resistant Klebsiella pneumoniae	21	OO
MG50.54	- - - - - Carbapenem resistant Klebsiella pneumoniae	21	OO
MG50.55	- - - - - Polymixin resistant Klebsiella pneumoniae	21	OO
MG50.56	- - - - - Extended-spectrum beta-lactamase producing Klebsiella pneumoniae	21	OO
MG50.5Y	- - - - - Klebsiella pneumoniae resistant to other antibiotic	21	OO
MG50.5Z	- - - - - Klebsiella pneumoniae resistant to unspecified antibiotic	21	OO
MG50.6	- - - - Antibiotic resistant Neisseria gonorrhoeae	21	OO
MG50.60	- - - - - Third generation cephalosporin resistant Neisseria gonorrhoeae	21	OO
MG50.61	- - - - - Macrolide resistant Neisseria gonorrhoeae	21	OO
MG50.62	- - - - - Aminocyclitol resistant Neisseria gonorrhoeae	21	OO
MG50.63	- - - - - Fluoroquinolone resistant Neisseria gonorrhoeae	21	OO
MG50.64	- - - - - Aminoglycoside resistant Neisseria gonorrhoeae	21	OO
MG50.6Y	- - - - - Neisseria gonorrhoeae resistant to other antibiotic	21	OO
MG50.6Z	- - - - - Neisseria gonorrhoeae resistant to unspecified antibiotic	21	OO
MG50.7	- - - - Antibiotic resistant Neisseria meningitidis	21	OO
MG50.70	- - - - - Penicillin resistant Neisseria meningitidis	21	OO
MG50.7Y	- - - - - Other specified antibiotic resistant Neisseria meningitidis	21	OO
MG50.7Z	- - - - - Antibiotic resistant Neisseria meningitidis, unspecified	21	OO
MG50.8	- - - - Antibiotic resistant Pseudomonas aeruginosa	21	OO
MG50.80	- - - - - Carbapenem-resistant Pseudomonas aeruginosa	21	OO
MG50.81	- - - - - Polymixin-resistant Pseudomonas aeruginosa	21	OO
MG50.8Y	- - - - - Pseudomonas aeruginosa resistant to other antibiotic	21	OO
MG50.8Z	- - - - - Pseudomonas aeruginosa resistant to unspecified antibiotic	21	OO
MG50.9	- - - - Antibiotic resistant Salmonella	21	OO
MG50.90	- - - - - Fluoroquinolone resistant Salmonella	21	OO
MG50.91	- - - - - Third generation cephalosporin resistant Salmonella	21	OO
MG50.92	- - - - - Carbapenem resistant Salmonella	21	OO
MG50.9Y	- - - - - Salmonella resistant to other antibiotic	21	OO
MG50.9Z	- - - - - Salmonella resistant to unspecified antibiotic	21	OO
MG50.A	- - - - Antibiotic resistant Shigella	21	OO
MG50.A0	- - - - - Carbapenem resistant Shigella	21	OO
MG50.A1	- - - - - Fluoroquinolone resistant Shigella	21	OO
MG50.A2	- - - - - Third-generation cephalosporins resistant Shigella	21	OO
MG50.A3	- - - - - Macrolides resistant Shigella	21	OO
MG50.AY	- - - - - Shigella resistant to other antibiotic	21	OO
MG50.AZ	- - - - - Shigella resistant to unspecified antibiotic	21	OO
MG50.B	- - - - Antibiotic resistant Vibrio	21	OO
MG50.B0	- - - - - Fluoroquinolone resistant Vibrio	21	OO
MG50.BY	- - - - - Vibrio resistant to other antibiotic	21	OO
MG50.BZ	- - - - - Vibrio resistant to unspecified antibiotic	21	OO
MG50.C	- - - - Other antibiotic resistant Enterobacteriaceae	21	OO
MG50.C0	- - - - - Carbapenem resistant Enterobacteriaceae	21	OO
MG50.C1	- - - - - Third-generation cephalosporin resistant Enterobacteriaceae	21	OO
MG50.CY	- - - - - Other specified other antibiotic resistant Enterobacteriaceae	21	OO
MG50.CZ	- - - - - Other antibiotic resistant Enterobacteriaceae, unspecified	21	OO
MG50.Y	- - - - Other specified finding of gram negative bacteria resistant to antimicrobial drugs	21	OO
MG50.Z	- - - - Finding of gram negative bacteria resistant to antimicrobial drugs, unspecified	21	OO
MG51	- - - Finding of gram positive bacteria resistant to antimicrobial drugs	21	OO
MG51.0	- - - - Antibiotic resistant Staphylococcus aureus	21	OO
MG51.00	- - - - - Methicillin resistant Staphylococcus aureus	21	OO
MG51.01	- - - - - Vancomycin resistant Staphylococcus aureus	21	OO
MG51.02	- - - - - Penicillinase-stable beta lactams resistant Staphylococcus aureus	21	OO
MG51.0Y	- - - - - Other specified antibiotic resistant Staphylococcus aureus	21	OO
MG51.0Z	- - - - - Antibiotic resistant Staphylococcus aureus, unspecified	21	OO
MG51.1	- - - - Antibiotic resistant Streptococcus pneumoniae	21	OO
MG51.10	- - - - - Penicillin resistant Streptococcus pneumoniae	21	OO
MG51.11	- - - - - Sulfonamide and trimethoprim resistant Streptococcus pneumoniae	21	OO
MG51.12	- - - - - Third-generation cephalosporins resistant Streptococcus pneumoniae	21	OO
MG51.1Y	- - - - - Streptococcus pneumoniae resistant to other antibiotic	21	OO
MG51.1Z	- - - - - Streptococcus pneumoniae resistant to unspecified antibiotic	21	OO
MG51.2	- - - - Antibiotic resistant Enterococcus	21	OO
MG51.20	- - - - - Vancomycin resistant Enterococcus	21	OO
MG51.2Y	- - - - - Enterococcus resistant to other antibiotic	21	OO
MG51.2Z	- - - - - Enteroccus resistant to unspecified antibiotic	21	OO
MG51.Y	- - - - Other specified finding of gram positive bacteria resistant to antimicrobial drugs	21	OO
MG51.Z	- - - - Finding of gram positive bacteria resistant to antimicrobial drugs, unspecified	21	OO
MG52	- - - Finding of bacteria, neither gram negative nor positive, resistant to antimicrobial drugs	21	OO
MG52.0	- - - - Antibiotic resistant Mycobacterium	21	OO
MG52.00	- - - - - Multi-drug resistant tuberculous Mycobacterium	21	OO
MG52.01	- - - - - Antibiotic resistant non-tuberculous Mycobacterium	21	OO
MG52.0Y	- - - - - Other specified antibiotic resistant Mycobacterium	21	OO
MG52.0Z	- - - - - Antibiotic resistant Mycobacterium, unspecified	21	OO
MG52.Y	- - - - Other specified finding of bacteria, neither gram negative nor positive, resistant to antimicrobial drugs	21	OO
MG52.Z	- - - - Finding of bacteria, neither gram negative nor positive, resistant to antimicrobial drugs, unspecified	21	OO
MG53	- - - Finding of virus resistant to antimicrobial drugs	21	OO
MG53.0	- - - - Antiretroviral therapy resistant Human immunodeficiency virus	21	OO
MG53.Y	- - - - Other specified finding of virus resistant to antimicrobial drugs	21	OO
MG53.Z	- - - - Finding of virus resistant to antimicrobial drugs, unspecified	21	OO
MG54	- - - Finding of fungus resistant to antimicrobial drugs	21	OO
MG55	- - - Finding of parasite resistant to antimicrobial drugs	21	OO
MG55.0	- - - - Artemisinin resistant Plasmodium falciparum	21	OO
MG55.Y	- - - - Other specified finding of parasite resistant to antimicrobial drugs	21	OO
MG55.Z	- - - - Finding of parasite resistant to antimicrobial drugs, unspecified	21	OO
MG56	- - - Finding of microorganism resistant to other multiple antimicrobial drugs	21	OO
MG5Y	- - - Finding of other microorganism resistant to antimicrobial drugs	21	OO
MG5Z	- - - Finding of microorganism resistant to antimicrobial drugs, unspecified	21	OO
0	- - Clinical findings in specimens from other specified organs, systems and tissues	21	OO
MG60	- - - Abnormal level of enzymes in specimens from other organs, systems and tissues	21	OO
MG61	- - - Abnormal level of hormones in specimens from other organs, systems and tissues	21	OO	80	46	OO.80.46
MG62	- - - Abnormal level of drugs, medicaments and biological substances in specimens from other organs, systems and tissues	21	OO
MG63	- - - Abnormal level of substances chiefly nonmedicinal as to source in specimens from other organs, systems and tissues	21	OO
MG64	- - - Abnormal immunological findings in specimens from other organs, systems and tissues	21	OO
MG65	- - - Abnormal microbiological findings in specimens from other organs, systems and tissues	21	OO
MG66	- - - Abnormal cytological findings in specimens from other organs, systems and tissues	21	OO
MG67	- - - Abnormal histological findings in specimens from other organs, systems and tissues	21	OO
MG6Y	- - - Other specified clinical findings in specimens from other specified organs, systems and tissues	21	OO
0	- - Abnormal results, not elsewhere classified	21	OO
MG70	- - - Abnormal diagnostic imaging results not elsewhere classified	21	OO
MG71	- - - Abnormal laboratory results, not elsewhere classified	21	OO
MG71.0	- - - - Abnormal findings on neonatal screening	21	OO
MG71.Y	- - - - Other specified abnormal laboratory results, not elsewhere classified	21	OO
MG71.Z	- - - - Abnormal laboratory results, not elsewhere classified, unspecified	21	OO
MG72	- - - Abnormal results of function studies of other organs and systems	21	OO
MG7Y	- - - Other specified abnormal results, not elsewhere classified	21	OO
MG7Z	- - - Abnormal results, not elsewhere classified, unspecified	21	OO
MG9Y	- - Other specified general symptoms, signs or clinical findings	21	OO
0	- Ill-defined and unknown causes of mortality	21	OO
MH10	- - Brain death	21	HE
MH11	- - Sudden infant death syndrome	21	OO
MH11.0	- - - Sudden infant death syndrome with mention of autopsy	21	OO
MH11.1	- - - Sudden infant death syndrome without autopsy	21	OO
MH11.Z	- - - Sudden infant death syndrome, unspecified	21	OO
MH12	- - Other sudden death, cause unknown	21	OO
MH12.0	- - - Instantaneous death	21	OO
MH12.1	- - - Death occurring less than 24 hours from onset of symptoms, not otherwise explained	21	OO
MH12.Z	- - - Unspecified sudden death, cause unknown	21	OO
MH13	- - Unattended death	21	OO
MH14	- - Other ill-defined and unspecified causes of mortality	21	OO
MH15	- - Sudden unexpected death in epilepsy	21	OO
MH16	- - Multi organ failure	21	OO
MH2Y	- Other specified symptoms, signs or clinical findings, not elsewhere classified	21	OO
0	Injury, poisoning or certain other consequences of external causes	22	OO
0	- Injuries to the head	22	HE	83	83	HE.83.83
NA00	- - Superficial injury of head	22	HE	83	83
NA00.0	- - - Superficial injury of scalp	22	HE	83	83
NA00.00	- - - - Abrasion of scalp	22	HE	60	26
NA00.01	- - - - Contusion of scalp	22	HE	10	24
NA00.02	- - - - Superficial foreign body in scalp	22	HE	83	83
NA00.0Y	- - - - Other specified superficial injury of scalp	22	HE	83	83	HE.83.83
NA00.0Z	- - - - Superficial injury of scalp, type unspecified	22	HE	83	83	HE.83.83
NA00.1	- - - Superficial injury of eyelid or periocular area	22	HE
NA00.10	- - - - Abrasion of eyelid or periocular area	22	HE	60	26
NA00.11	- - - - Contusion of eyelid or periocular area	22	HE	60	24
NA00.12	- - - - Other superficial injuries of eyelid or periocular area	22	HE	83	83	HE.83.83
NA00.1Y	- - - - Other specified superficial injury of eyelid or periocular area	22	HE	83	83	HE.83.83
NA00.1Z	- - - - Superficial injury of eyelid or periocular area, unspecified	22	HE	83	83	HE.83.83
NA00.2	- - - Superficial injury of ear	22	HE	83	83
NA00.3	- - - Superficial injury of nose	22	HE	83	83
NA00.4	- - - Superficial injury of lip or oral cavity	22	HE	83	83
NA00.5	- - - Multiple superficial injuries of head	22	HE	83	83
NA00.6	- - - Abrasion of other or unspecified sites of head	22	HE	60	25
NA00.7	- - - Contusion of other or unspecified sites of head	22	HE	60	24
NA00.Y	- - - Superficial injury of other specified part of head	22	HE	83	83
NA00.Z	- - - Superficial injury of unspecified part of head	22	HE	83	83
NA01	- - Open wound of head	22	HE	60	25	HE.60.25
NA01.2	- - - Laceration without foreign body of head	22	HE	60	25
NA01.3	- - - Laceration with foreign body of head	22	HE	60	25
NA01.4	- - - Puncture wound without foreign body of head	22	HE	60	25	HE.60.25
NA01.5	- - - Puncture wound with foreign body of head	22	HE	60	25	HE.60.25
NA01.6	- - - Open bite of head	22	HE	83	83
NA01.7	- - - Multiple open wounds of head	22	HE	60	25
NA01.Y	- - - Other specified open wound of head	22	HE	60	25	HE.60.25
NA01.Z	- - - Open wound of head, unspecified	22	HE	60	25	HE.60.25
NA02	- - Fracture of skull or facial bones	22	HE	30	13-17,19
NA02.0	- - - Fracture of vault of skull	22	HE	30	13-17,19
NA02.00	- - - - Fracture of squama of frontal bone of skull	22	HE	30	13-17,19
NA02.01	- - - - Fracture of parietal bone of skull	22	HE	30	13-17,19
NA02.02	- - - - Fracture of squama of temporal bone of skull	22	HE	30	13-17,19
NA02.03	- - - - Fracture of squama of occipital bone of skull	22	HE	30	13-17,19
NA02.1	- - - Fracture of base of skull	22	HE	30	13-17,19
NA02.10	- - - - Fracture of anterior fossa of base of skull	22	HE	30	13-17,19
NA02.11	- - - - Fracture of middle fossa of base of skull	22	HE	30	13-17,19
NA02.12	- - - - Fracture of posterior fossa of base of skull	22	HE	30	13-17,19
NA02.13	- - - - Fracture of sinus of ethmoid bone of skull	22	HE	30	13-17,19
NA02.14	- - - - Fracture of frontal sinus of skull	22	HE	30	13-17,19
NA02.15	- - - - Fracture of sphenoid bone of skull	22	HE	30	13-17,19
NA02.16	- - - - Fracture of occipital condyle of skull, type I	22	HE	30	13-17,19
NA02.17	- - - - Fracture of occipital condyle of skull, type II	22	HE	30	13-17,19
NA02.18	- - - - Fracture of occipital condyle of skull, type III	22	HE	30	13-17,19
NA02.19	- - - - Fracture of other part of occipital bone of skull	22	HE	30	13-17,19
NA02.1A	- - - - Other fractures of base of skull	22	HE	30	13-17,19
NA02.1Z	- - - - Fracture of base of skull, unspecified	22	HE	30	13-17,19
NA02.2	- - - Orbital Fracture	22	HE	30	13-17,19
NA02.20	- - - - Fracture of orbital roof	22	HE	30	13-17,19
NA02.21	- - - - Fracture of orbital floor	22	HE	30	13-17,19
NA02.2Y	- - - - Other specified orbital Fracture	22	HE	30	13-17,19
NA02.2Z	- - - - Orbital Fracture, unspecified	22	HE	30	13-17,19
NA02.3	- - - Fracture of nasal bones	22	HE	30	13-17,19
NA02.4	- - - Fracture of maxilla	22	HE	30	13-17,19
NA02.40	- - - - Le Fort fracture type I	22	HE	30	13-17,19
NA02.41	- - - - Le Fort fracture type II	22	HE	30	13-17,19
NA02.42	- - - - Le Fort fracture type III	22	HE	30	13-17,19
NA02.4Y	- - - - Other specified fracture of maxilla	22	HE	30	13-17,19
NA02.4Z	- - - - Fracture of maxilla, unspecified	22	HE	30	13-17,19
NA02.5	- - - Fracture of zygoma	22	HE	30	13-17,19
NA02.6	- - - Fracture of tooth	22	HE	30	13-17,19
NA02.7	- - - Fracture of mandible	22	HE	30	13-17,19
NA02.70	- - - - Fracture of condylar process of mandible	22	HE	30	13-17,19
NA02.71	- - - - Fracture of subcondylar process of mandible	22	HE	30	13-17,19
NA02.72	- - - - Fracture of coronoid process of mandible	22	HE	30	13-17,19
NA02.73	- - - - Fracture of ramus of mandible	22	HE	30	13-17,19
NA02.74	- - - - Fracture of angle of mandible	22	HE	30	13-17,19
NA02.75	- - - - Fracture of alveolar margin of mandible	22	HE	30	13-17,19
NA02.76	- - - - Fracture of symphysis of mandible	22	HE	30	13-17,19
NA02.7Y	- - - - Other specified fracture of mandible	22	HE	30	13-17,19
NA02.7Z	- - - - Fracture of mandible, unspecified	22	HE	30	13-17,19
NA02.8	- - - Multiple fractures involving skull or facial bones	22	HE	30	13-17,19
NA02.Y	- - - Fracture of other specified skull or facial bones	22	HE	30	13-17,19
NA02.Z	- - - Fracture of skull and facial bones, part unspecified	22	HE	30	13-17,19
NA03	- - Dislocation or strain or sprain of joints or ligaments of head	22	HE	81	81
NA03.0	- - - Dislocation of jaw	22	HE	81	81
NA03.1	- - - Dislocation of septal cartilage of nose	22	HE
NA03.2	- - - Dislocation of tooth	22	HE	81	81
NA03.3	- - - Strain or sprain of jaw	22	HE
NA03.Y	- - - Dislocation or sprain of other specified joints or ligaments of head	22	HE
NA03.Z	- - - Dislocation or strain or sprain of joints or ligaments of head, unspecified	22	HE
NA04	- - Injury of cranial nerves	22	HE	20	40
NA04.0	- - - Injury of olfactory nerve	22	HE	20	40	HE.20.40
NA04.1	- - - Injury of optic nerve or pathways	22	HE	20	40	HE.20.40
NA04.10	- - - - Injury of optic nerve, unilateral	22	HE	20	40	HE.20.40
NA04.11	- - - - Injury of optic nerve, bilateral	22	HE	20	40	HE.20.40
NA04.12	- - - - Injury of optic chiasm	22	HE	20	40	HE.20.40
NA04.13	- - - - Injury of optic tract or pathways, unilateral	22	HE	20	40	HE.20.40
NA04.14	- - - - Injury of optic tract or pathways, bilateral	22	HE	20	40	HE.20.40
NA04.15	- - - - Injury of visual cortex, unilateral	22	HE	20	40	HE.20.40
NA04.16	- - - - Injury of visual cortex, bilateral	22	HE	20	40	HE.20.40
NA04.1Y	- - - - Other specified injury of optic nerve or pathways	22	HE	20	40	HE.20.40
NA04.1Z	- - - - Injury of optic nerve or pathways, unspecified	22	HE	20	40	HE.20.40
NA04.2	- - - Injury of oculomotor nerve	22	HE	20	40
NA04.3	- - - Injury of trochlear nerve	22	HE	20	40
NA04.4	- - - Injury of trigeminal nerve	22	HE	20	40
NA04.5	- - - Injury of abducent nerve	22	HE	20	40
NA04.6	- - - Injury of facial nerve	22	HE	20	40
NA04.7	- - - Injury of acoustic nerve	22	HE	20	40	HE.20.40
NA04.8	- - - Injury of glossopharyngeal nerve	22	HE	20	40	HE.20.40
NA04.9	- - - Injury of vagus nerve	22	HE	20	40	HE.20.40
NA04.A	- - - Injury of accessory nerve	22	HE	20	40
NA04.B	- - - Injury of hypoglossal nerve	22	HE	20	40	HE.20.40
NA04.Z	- - - Injury of cranial nerves, unspecified	22	HE	20	40	HE.20.40
NA05	- - Injury of blood vessels of head	22	HE	60	24	HE.60.24
NA05.0	- - - Injury of intracranial vessels of head	22	HE	60	24	HE.60.24
NA05.1	- - - Injury of extracranial vessels of head	22	HE	60	24	HE.60.24
NA05.Z	- - - Injury of blood vessels of head, unspecified	22	HE	60	24	HE.60.24
NA06	- - Injury of eye or orbit	22	HE	80	46	HE.80.46
NA06.0	- - - Eyelid trauma	22	HE	83	83
NA06.00	- - - - Eyelid Avulsion	22	HE	83	83	HE.83.83
NA06.01	- - - - Haematoma of eyelid	22	HE	83	83	HE.83.83
NA06.02	- - - - Oedema of eyelid	22	HE	83	83	HE.83.83
NA06.03	- - - - Retained foreign body in eyelid	22	HE	83	83	HE.83.83
NA06.04	- - - - Open wound of eyelid or periocular area	22	HE	83	83	HE.83.83
NA06.0Y	- - - - Other specified eyelid trauma	22	HE	83	83	HE.83.83
NA06.0Z	- - - - Eyelid trauma, unspecified	22	HE	83	83	HE.83.83
NA06.1	- - - Penetrating wound of orbit with or without foreign body	22	HE	83	83	HE.83.83
NA06.2	- - - Retained foreign body following penetrating wound of orbit	22	HE	83	83	HE.83.83
NA06.3	- - - Traumatic orbital haemorrhage	22	HE	83	83	HE.83.83
NA06.4	- - - Injury of conjunctiva or corneal abrasion without mention of foreign body	22	HE	80	46	HE.80.46
NA06.5	- - - Trauma to the iris sphincter	22	HE	80	46	HE.80.46
NA06.6	- - - Traumatic injuries of the retina	22	HE	80	46	HE.80.46
NA06.60	- - - - Traumatic macular hole	22	HE	80	46	HE.80.46
NA06.61	- - - - Choroidal rupture	22	HE	80	46	HE.80.46
NA06.62	- - - - Commotio Retina	22	HE	80	46	HE.80.46
NA06.63	- - - - Optic nerve avulsion	22	HE	80	46	HE.80.46
NA06.6Y	- - - - Other specified traumatic injuries of the retina	22	HE	80	46	HE.80.46
NA06.6Z	- - - - Traumatic injuries of the retina, unspecified	22	HE	80	46	HE.80.46
NA06.7	- - - Traumatic retinal haemorrhage	22	HE	80	46
NA06.8	- - - Traumatic injury to eyeball	22	HE	80	46
NA06.80	- - - - Retained intraocular magnetic foreign body, unilateral	22	HE	80	46	HE.80.46
NA06.81	- - - - Retained intraocular nonmagnetic foreign body, unilateral	22	HE	80	46	HE.80.46
NA06.82	- - - - Closed eyeball trauma, unilateral	22	HE	80	46	HE.80.46
NA06.83	- - - - Closed eyeball trauma, bilateral	22	HE	80	46	HE.80.46
NA06.84	- - - - Penetrating wound of eyeball without foreign body, unilateral	22	HE	80	46	HE.80.46
NA06.85	- - - - Avulsion of eye, unilateral	22	HE	80	46	HE.80.46
NA06.86	- - - - Avulsion of eye, bilateral	22	HE	80	46	HE.80.46
NA06.87	- - - - Ocular laceration or rupture with prolapse or loss of intraocular tissue, unilateral	22	HE	80	46	HE.80.46
NA06.88	- - - - Ocular laceration or rupture with prolapse or loss of intraocular tissue, bilateral	22	HE	80	46	HE.80.46
NA06.89	- - - - Penetrating injury of eyeball, bilateral	22	HE	80	46	HE.80.46
NA06.8A	- - - - Perforating injury of eyeball, bilateral	22	HE	80	46	HE.80.46
NA06.8B	- - - - Retained intraocular magnetic foreign body, bilateral	22	HE	80	46	HE.80.46
NA06.8C	- - - - Retained intraocular nonmagnetic foreign body, bilateral	22	HE	80	46	HE.80.46
NA06.8D	- - - - Ocular laceration without prolapse or loss of intraocular tissue, unilateral	22	HE	80	46	HE.80.46
NA06.8E	- - - - Ocular laceration without prolapse or loss of intraocular tissue, bilateral	22	HE	80	46	HE.80.46
NA06.8Y	- - - - Other specified traumatic injury to eyeball	22	HE	80	46	HE.80.46
NA06.8Z	- - - - Traumatic injury to eyeball, unspecified	22	HE	80	46	HE.80.46
NA06.9	- - - Contusion of eyeball or orbital tissues	22	HE	80	46	HE.80.46
NA06.A	- - - Injury of lens	22	HE	80	46	HE.80.46
NA06.Y	- - - Other specified injury of eye or orbit	22	HE	80	46	HE.80.46
NA06.Z	- - - Injury of eye or orbit, unspecified	22	HE	80	46	HE.80.46
NA07	- - Intracranial injury	22	HE	83	83	HE.83.83
NA07.0	- - - Concussion	22	HE	20	40
NA07.00	- - - - Incomplete loss of consciousness with amnesia	22	HE	20	40
NA07.01	- - - - Incomplete loss of consciousness without amnesia	22	HE	20	40
NA07.02	- - - - Loss of consciousness, short duration of less than 30 minutes	22	HE	20	40
NA07.03	- - - - Loss of consciousness, short duration of 30 minutes to less than one hour	22	HE	20	40
NA07.04	- - - - Loss of consciousness, short duration of one hour to less than 6 hours	22	HE	20	40
NA07.05	- - - - Loss of consciousness, intermediate duration of 6 hours to less than 24 hours	22	HE	20	40
NA07.06	- - - - Loss of consciousness, persisting longer than 24 hours or until discharge or latest assessment	22	HE	20	40
NA07.07	- - - - Loss of consciousness, persisting until death	22	HE	20	40
NA07.08	- - - - Loss of consciousness, duration unspecified or unknown due to effects of therapy	22	HE	20	40	HE.20.40
NA07.09	- - - - Loss of consciousness, duration unspecified or unknown due to lack of information	22	HE	20	40
NA07.0Y	- - - - Other specified concussion	22	HE	20	40	HE.20.40
NA07.1	- - - Traumatic intracerebral haemorrhage	22	HE	20	40
NA07.2	- - - Traumatic cerebral oedema	22	HE	20	40
NA07.20	- - - - Diffuse traumatic oedema	22	HE	20	40
NA07.21	- - - - Focal traumatic oedema	22	HE	20	40
NA07.2Y	- - - - Other specified traumatic cerebral oedema	22	HE	20	40
NA07.2Z	- - - - Traumatic cerebral oedema, unspecified	22	HE	20	40	HE.20.40
NA07.3	- - - Diffuse brain injury	22	HE	20	40
NA07.30	- - - - Diffuse injury of cerebrum	22	HE	20	40
NA07.31	- - - - Diffuse injury of cerebellum	22	HE	20	40
NA07.32	- - - - Diffuse injury of brainstem	22	HE	20	40
NA07.33	- - - - Diffuse injury of multiple parts of brain	22	HE	20	40	HE.20.40
NA07.3Y	- - - - Other specified diffuse brain injury	22	HE	20	40	HE.20.40
NA07.3Z	- - - - Unspecified diffuse traumatic brain injury	22	HE	20	40	HE.20.40
NA07.4	- - - Focal brain injury	22	HE	20	40	HE.20.40
NA07.40	- - - - Focal non-haemorrhagic contusion of cerebrum	22	HE	20	40	HE.20.40
NA07.41	- - - - Focal haemorrhagic contusion of cerebrum	22	HE	20	40	HE.20.40
NA07.42	- - - - Focal laceration of cerebrum	22	HE	20	40	HE.20.40
NA07.43	- - - - Multiple focal injuries of cerebrum	22	HE	20	40	HE.20.40
NA07.44	- - - - Focal non-haemorrhagic contusion of cerebellum	22	HE	20	40	HE.20.40
NA07.45	- - - - Focal haematoma or haemorrhage of cerebellum	22	HE	20	40	HE.20.40
NA07.46	- - - - Focal laceration of cerebellum	22	HE	20	40	HE.20.40
NA07.47	- - - - Multiple focal injuries of cerebellum	22	HE	20	40	HE.20.40
NA07.48	- - - - Focal non-haemorrhagic contusion of brainstem	22	HE	20	40	HE.20.40
NA07.49	- - - - Focal haematoma or haemorrhage of brainstem	22	HE	20	40	HE.20.40
NA07.4A	- - - - Contusion of temporal lobe	22	HE	20	40	HE.20.40
NA07.4B	- - - - Focal laceration of brainstem	22	HE	20	40	HE.20.40
NA07.4C	- - - - Focal brain contusion	22	HE	20	40	HE.20.40
NA07.4D	- - - - Focal brain laceration	22	HE	20	40	HE.20.40
NA07.4E	- - - - Contusion of parietal lobe	22	HE	20	40	HE.20.40
NA07.4F	- - - - Contusion of occipital lobe	22	HE	20	40	HE.20.40
NA07.4Z	- - - - Unspecified focal traumatic brain injury	22	HE	20	40	HE.20.40
NA07.5	- - - Traumatic epidural haemorrhage	22	HE	20	40
NA07.6	- - - Traumatic subdural haemorrhage	22	HE	20	40
NA07.7	- - - Traumatic subarachnoid haemorrhage	22	HE	20	40
NA07.8	- - - Traumatic haemorrhage in brain tissue	22	HE	20	40
NA07.80	- - - - Traumatic haemorrhage in cerebrum white matter	22	HE	20	40	HE.20.40
NA07.81	- - - - Traumatic haemorrhage in thalamus or basal ganglia	22	HE	20	40	HE.20.40
NA07.82	- - - - Traumatic haemorrhage in cerebellum	22	HE	20	40	HE.20.40
NA07.83	- - - - Traumatic haemorrhage in brainstem	22	HE	20	40	HE.20.40
NA07.84	- - - - Traumatic haemorrhage in brainstem, primary	22	HE	20	40	HE.20.40
NA07.85	- - - - Traumatic haemorrhage in brainstem, secondary	22	HE	20	40	HE.20.40
NA07.86	- - - - Multiple traumatic haemorrhages	22	HE	20	40	HE.20.40
NA07.8Y	- - - - Other specified traumatic haemorrhage in brain tissue	22	HE	20	40	HE.20.40
NA07.8Z	- - - - Traumatic haemorrhage in brain tissue, unspecified	22	HE	20	40	HE.20.40
NA07.Y	- - - Other specified intracranial injury	22	HE	83	83	HE.83.83
NA07.Z	- - - Intracranial injury, unspecified	22	HE	83	83	HE.83.83
NA08	- - Crushing injury of head	22	HE	82	82	HE.82.82
NA08.0	- - - Crushing injury of brain	22	HE	20	40	HE.20.40
NA08.1	- - - Crushing injury of face	22	HE	82	82	HE.82.82
NA08.2	- - - Crushing injury of skull	22	HE	82	82	HE.82.82
NA08.3	- - - Crushed scalp	22	HE	82	82	HE.82.82
NA08.Y	- - - Other specified crushing injury of head	22	HE	82	82	HE.82.82
NA08.Z	- - - Crushing injury of head, unspecified	22	HE	82	82	HE.82.82
NA09	- - Traumatic amputation of part of head	22	HE	82	82	HE.82.82
NA09.0	- - - Avulsion of scalp	22	HE	82	82	HE.82.82
NA09.1	- - - Traumatic amputation of ear	22	HE	80	46
NA09.10	- - - - Traumatic amputation of ear, complete	22	HE	80	46	HE.80.46
NA09.11	- - - - Traumatic amputation of ear, partial	22	HE	80	46	HE.80.46
NA09.1Y	- - - - Other specified traumatic amputation of ear	22	HE	80	46	HE.80.46
NA09.1Z	- - - - Traumatic amputation of ear, unspecified	22	HE	80	46	HE.80.46
NA09.2	- - - Traumatic amputation of nose	22	HE	80	46
NA09.20	- - - - Traumatic amputation of nose, complete	22	HE	80	46	HE.80.46
NA09.21	- - - - Traumatic amputation of nose, partial	22	HE	80	46	HE.80.46
NA09.2Y	- - - - Other specified traumatic amputation of nose	22	HE	80	46	HE.80.46
NA09.2Z	- - - - Traumatic amputation of nose, unspecified	22	HE	80	46	HE.80.46
NA09.3	- - - Traumatic amputation of lip	22	HE	83	83
NA09.Y	- - - Other specified traumatic amputation of part of head	22	HE	83	83	HE.83.83
NA09.Z	- - - Traumatic amputation of part of head, unspecified	22	HE	83	83	HE.83.83
NA0A	- - Certain specified injuries of head	22	HE	83	83	HE.83.83
NA0A.0	- - - Complex wounds to the head	22	HE	83	83	HE.83.83
NA0A.00	- - - - Complex wounds to the head with retained external material	22	HE	83	83	HE.83.83
NA0A.01	- - - - Complex wounds to the head with intracranial haemorrhage	22	HE	83	83	HE.83.83
NA0A.02	- - - - Complex wounds to the head with through and through perforation	22	HE	83	83	HE.83.83
NA0A.03	- - - - Complex wounds to the head with avulsive loss of part of skull and cranial contents	22	HE	83	83	HE.83.83
NA0A.0Y	- - - - Other specified complex wounds to the head	22	HE	83	83	HE.83.83
NA0A.0Z	- - - - Complex wounds to the head, unspecified	22	HE	83	83	HE.83.83
NA0A.1	- - - Injury of muscle, fascia or tendon of head	22	HE	83	83
NA0A.10	- - - - Strain or sprain of muscle, fascia or tendon of head	22	HE	83	83
NA0A.11	- - - - Laceration of muscle, fascia or tendon of head	22	HE	83	83
NA0A.1Y	- - - - Other specified injury of muscle, fascia or tendon of head	22	HE	10	01-07
NA0A.1Z	- - - - Injury of muscle, fascia or tendon of head, unspecified	22	HE	10	01-07
NA0A.2	- - - Traumatic rupture of ear drum	22	HE	80	46
NA0A.3	- - - Multiple injuries of head	22	HE	83	83	HE.83.83
NA0A.Y	- - - Other specified injuries of head	22	HE	83	83	HE.83.83
NA0B	- - Injury of the auricle	22	HE	80	46
NA0C	- - Injury of middle or inner ear	22	HE	80	46	HE.80.46
NA0Z	- - Injuries to the head, unspecified	22	HE	83	83	HE.83.83
0	- Injuries to the neck	22	NE	83	83	NE.83.83
NA20	- - Superficial injury of neck	22	NE	60	25
NA20.0	- - - Abrasion of throat	22	NE	60	26	NE.60.26
NA20.1	- - - Contusion of throat	22	NE	60	24	NE.60.24
NA20.2	- - - Other or unspecified superficial injuries of throat	22	NE	83	83	NE.83.83
NA20.3	- - - Multiple superficial injuries of neck	22	NE	83	83	NE.83.83
NA20.Y	- - - Other specified superficial injury of neck	22	NE	83	83	NE.83.83
NA20.Z	- - - Superficial injury of neck, unspecified	22	NE	83	83	NE.83.83
NA21	- - Open wound of neck	22	NE	83	83	NE.83.83
NA21.0	- - - Laceration without foreign body of neck	22	NE	60	25
NA21.1	- - - Laceration with foreign body of neck	22	NE	60	25
NA21.2	- - - Puncture wound without foreign body of neck	22	NE	60	25	NE.60.25
NA21.3	- - - Puncture wound with foreign body of neck	22	NE	60	25	NE.60.25
NA21.4	- - - Open bite of neck	22	NE	60	25	NE.60.25
NA21.5	- - - Multiple open wounds of neck	22	NE	60	25	NE.60.25
NA21.Y	- - - Other specified open wound of neck	22	NE	60	25	NE.60.25
[truncated: 2,711 more rows]

## Sheet: SMDCS v1 to v2
SMDCS version 1 diagnosis	SMDCSv1	SMDCS2	ICD-9	ICD-10-CA
Other abdominal injury	AB.00.00	AB.90.00	843.8	S36.9
Abdomen laceration	AB.00.24	AB.60.25	873.0	S31.8
Abdomen abrasion	AB.00.25	AB.60.26	916.0	S31.8
Abdomen Neoplasm	AB.00.42	UO.96.76	159.0	D48
Abdominal pain / illness -Misc	AB.00.51	GI.04.83	789.0	R10.4
Liver contusion / injury	AB.01.23	AB.81.46	864.0	S36.1
Spleen contusion / injury	AB.02.23	AB.82.46	865.0	S36.0
Kidney Contusion	AB.03.23	AB.83.46	866.0	S37.0
Abdominal "stitch" / exercise induced diaphragmatic spasm	AB.10.08	AB.10.08	789.0	R10.4
Rectus Abdominus strain	AB.11.07	AB.11.07	847.2	M62.6
Diastasis Recti	AB.11.51	AB.11.09	847.2	M62.0
Abdominal wall strain	AB.12.07	AB.12.07	847.2	M62.6
Sports Hernia	AB.13.00	HI.18.07	553.9	K46
Ilioinguinal Nerve Entrapment	AB.20.51	HI.20.39	956.5	S34
Hernia - Inguinal and Femoral	AB.80.00	HI.80.00	843.8	K46
Other ankle injury	AN.00.00	AN.90.00	845.0	S96.9
Ankle contusion	AN.00.23	AN.90.24	824.0	S90.0
Ankle laceration	AN.00.24	AN.60.25	873.0	S91.0
Ankle abrasion	AN.00.25	AN.60.26	916.0	S91
Ankle neoplasm	AN.00.42		845.0	D48.0
Ankle extensor tendon rupture	AN.11.09	AN.11.09	845.0	S96
Ankle extensor tendinopathy	AN.11.26	AN.11.28	845.0	S96.8
Ankle extensor tenonsynovitis (including lace bite)	AN.11.27	AN.11.29	845.0	S99
Flexor hallucis longus tendinopathy	AN.12.26	AN.12.28	845.0	S96
Tibialis posterior tendon rupture	AN.13.09	AN.13.09	845.0	S96
Tibialis posterior tendinopathy	AN.13.26	AN.13.28	845.0	S96
Tibialis anterior tendinopathy	AN.14.26	AN.14.28	845.0	S96
Peroneus tendon rupture	AN.15.09	AN.15.09	845.0	S96
Peroneus tendon subluxation	AN.15.11	AN.15.11	845.0	S96
Peroneus tendinopathy	AN.15.26	AN.15.28	845.0	M76.7
Ankle reflex sympathetic dystrophy	AN.20.41	AN.20.43	956.5	M79.6
Ankle neuroma	AN.20.44	AN.20.41	956.5	G57.8
Tarsal tunnel syndrome	AN.21.51	AN.21.39	355.5	G57.5
Ankle fracture -Misc	AN.30.13	AN.30.13	824.8	S82
Medial Malleolus fracture	AN.32.13	AN.32.13	824.0	S82.5
Medial Malleolus avulsion fracture	AN.32.14	AN.32.14	824.0	S82.5
Medial Malleolus growth plate / physeal injury	AN.32.20	AN.32.20	824.0	S82.5
Medial Malleolus contusion	AN.32.23	AN.32.24	824.0	S90.0
Lateral Malleolus fracture	AN.33.13	AN.33.13	824.2	S82.6
Lateral Malleolus avulsion fracture	AN.33.14	AN.33.14	824.2	S82.6
Lateral Malleolus growth plate / physeal injury	AN.33.20	AN.33.20	824.2	S82.6
Lateral Malleolus contusion	AN.33.23	AN.33.24	824.2	S90.0
Talus fracture	AN.34.13	AN.34.13	825.2	S92.1
Talus osteochondral fracture	AN.34.17	AN.41.17	825.2	S92.1
Talus stress fracture	AN.34.18	AN.34.18	825.2	M84.3
Talar dome contusion	AN.34.23	AN.34.24	825.2	S90.0
Talus avascular necrosis	AN.34.34	AN.34.35	825.2	M87
Os Trigonum / Steida process syndrome	AN.34.51	AN.34.33	825.2	M79.6
Ankle functional instability	AN.40.12	AN.50.12	715.1	S96.9
Ankle degenerative/ostoearthritis	AN.40.32	AN.40.34	715.1	M19.9
Ankle sepsis	AN.40.38		715.1	M00
Anterior ankle impingement	AN.40.51	AN.42.30	715.1	S96.9
Posterior ankle impingement	AN.40.52	AN.43.30	715.1	S96.9
Deltoid ligament 1° sprain -acute	AN.51.01	AN.51.01	845.0	S93.4
Deltoid ligament 2° sprain -acute	AN.51.02	AN.51.02	845.0	S93.4
Deltoid ligament 3° sprain -acute	AN.51.03	AN.51.03	845.0	S93.4
Deltoid ligament 1° sprain -chronic	AN.51.04	AN.51.04	845.0	S93.4
Deltoid ligament 2° sprain -chronic	AN.51.05	AN.51.05	845.0	S93.4
Deltoid ligament 3° sprain -chronic	AN.51.06	AN.51.06	845.0	S93.4
Lateral ligament complex 1° sprain -acute	AN.52.01	AN.52.01	845.0	S93.4
Lateral ligament complex 2° sprain -acute	AN.52.02	AN.52.02	845.0	S93.4
Lateral ligament complex 3° sprain -acute	AN.52.03	AN.52.03	845.0	S93.4
Lateral ligament complex 1° sprain -chronic	AN.52.04	AN.52.04	845.0	S93.4
Lateral ligament complex 2° sprain -chronic	AN.52.05	AN.52.05	845.0	S93.4
Lateral ligament complex 3° sprain -chronic	AN.52.06	AN.52.06	845.0	S93.4
Anterior talofibular ligament 1° sprain -acute	AN.53.01	AN.53.01	845.0	S93.4
Anterior talofibular ligament 2° sprain -acute	AN.53.02	AN.53.02	845.0	S93.4
Anterior talofibular ligament 3° sprain -acute	AN.53.03	AN.53.03	845.0	S93.4
Anterior talofibular ligament 1° sprain -chronic	AN.53.04	AN.53.04	845.0	S93.4
Anterior talofibular ligament 2° sprain -chronic	AN.53.05	AN.53.05	845.0	S93.4
Anterior talofibular ligament 3° sprain -chronic	AN.53.06	AN.53.06	845.0	S93.4
Calcaneofibular ligament 1° sprain -acute	AN.54.01	AN.54.01	845.0	S93.4
Calcaneofibular ligament 2° sprain -acute	AN.54.02	AN.54.02	845.0	S93.4
Calcaneofibular ligament 3° sprain -acute	AN.54.03	AN.54.03	845.0	S93.4
Calcaneofibular ligament 1° sprain -chronic	AN.54.04	AN.54.04	845.0	S93.4
Calcaneofibular ligament 2° sprain -chronic	AN.54.05	AN.54.05	845.0	S93.4
Calcaneofibular ligament 3° sprain -chronic	AN.54.06	AN.54.06	845.0	S93.4
Posterior talofibular ligament 1° sprain -acute	AN.55.01	AN.55.01	845.0	S93.4
Posterior talofibular ligament 2° sprain -acute	AN.55.02	AN.55.02	845.0	S93.4
Posterior talofibular ligament 3° sprain -acute	AN.55.03	AN.55.03	845.0	S93.4
Posterior talofibular ligament 1° sprain -chronic	AN.55.04	AN.55.04	845.0	S93.4
Posterior talofibular ligament 2° sprain -chronic	AN.55.05	AN.55.05	845.0	S93.4
Posterior talofibular ligament 3° sprain -chronic	AN.55.06	AN.55.06	845.0	S93.4
Tibiofibular ligament syndesmosis (high ankle) 1° sprain -acute	AN.56.01	AN.56.01	845.0	S93.4
Tibiofibular ligament syndesmosis (high ankle) 2° sprain -acute	AN.56.02	AN.56.02	845.0	S93.4
Tibiofibular Diastasis	AN.56.51	AN.56.09	845.0	S93.4
Medial malleolus Bursitis	AN.61.29	AN.44.31	845.0	M70.8
Lateral malleolus Bursitis	AN.62.29	AN.45.31	845.0	M70.8
Other arm injury	AR.00.00	AR.90.00	840.8	M62
Upper Arm Contusion	AR.00.23	AR.90.24	923.0	S40.0
Upper arm laceration	AR.00.24	AR.60.25	873.0	S41.1
Upper arm abrasion	AR.00.25	AR.60.26	916.0	T14.1
Arm neoplasm	AR.00.42	UO.94.76	840.8	D48.0
Biceps brachii strain	AR.11.07	AR.11.07	841.8	S46.2
Distal biceps rupture	AR.11.09	AR.11.09	841.8	S46.2
Biceps brachii myositis ossificans	AR.11.51	AR.11.33	841.8	M61.0
Triceps strain	AR.12.07	AR.12.07	841.8	S46.3
Triceps rupture	AR.12.09	AR.12.09	841.8	S46.3
Radial nerve injury	AR.21.00	AR.21.39	955.3	S44.2
Humeral shaft fracture	AR.32.13	AR.32.13	812.2	S42.3
Humeral stress fracture	AR.32.18	AR.32.18	812.2	M84.3
Brodie's abscess of humerus	AR.32.35		812.2	M85.6
Other hematologic illness / disorder	BL.00.00	BL.00.83	289.9	R79
Hemotologic Neoplasm	BL.00.42	BL.01.76	208.0	C96
Iron deficiency anemia	BL.01.51	BL.01.77	281.9	D50
non-Iron deficiency anemia	BL.01.52	BL.02.77	281.9	D64
Vitamin B12 Deficiency	BL.01.53	BL.03.77	281.1	D51
Pre-latent iron deficiency	BL.02.51	BL.04.77	281.9	D50.9
Latent iron deficiency	BL.02.52	BL.05.77	281.9	D50.8
Platelet Disorder	BL.03.51	BL.01.78	287.9	D69.1
Clotting Disorder	BL.03.52	BL.02.78	287.9	D68.2
Splenomegaly	BL.04.51	BL.01.83	789.2	R16.1
Sickle cell trait / disorder	BL.05.51	BL.03.78	282.6	D57
Hodgkin's Lymphoma	BL.06.42	BL.02.76	202.8	C81
Non-Hodgkin's Lymphoma	BL.07.42	BL.03.76	202.8	C85.9
Other cardiovascular illness / disorder	CV.00.00	CV.01.83	429.2	I51.9
Sudden Cardiac Death	CV.01.51	CV.02.83	429.8	I46.1
Athletic Heart Syndrome	CV.02.51	CV.03.83	429.8	I51.7
Hypertrophic and other cardiomyopathy	CV.02.52	CV.01.79	425.4	I42.1
Myocarditis	CV.02.53	CV.01.74	422.0	I40
Pericarditis	CV.02.54	CV.02.74	420.0	I30
Arrythmia - Dysrythmia (General)	CV.03.51	CV.04.83	427.8	I49
Atral Fibrillation	CV.03.52		427.3	I48
Supraventicular tachycardia	CV.03.53		427.3	I47.1
Ventricular Dysrythmia	CV.03.54		427.8	I49.0
Autonomic Dysfunction (syncope)	CV.03.55	CV.05.83	780.2	G90.4
Aortic Valve disease	CV.04.51	CV.06.83	424.1	I35.9
Pulmonary Valve Disease	CV.04.52	CV.07.83	424.3	I37.9
Tricuspid Valve Disease	CV.04.53	CV.08.83	424.2	I07.9
Mitral Valve Disease	CV.04.54	CV.09.83	424.4	I05.9
Mitral Valve Prolapse	CV.04.55		424.4	I34.1
Angina Syndrome	CV.05.51	CV.02.79	413.0	I20
Infarction/Stenosis	CV.05.52	CV.07.78	410.0	I21
Hypertension	CV.05.53	CV.03.79	401.0	I10
Deep vein thrombosis	CV.05.54	CV.02.78	671.0	I80.2
Other dermatologic illness / disorder	DE.00.00	DE.00.83	709.8	R23.8
Skin Neoplasm	DE.00.42	DE.02.76	173.0	D48.5
Burn	DE.01.51	DE.01.73	949.0	T30
Blister	DE.01.52		919.8	L98
Callus, corn	DE.01.53	OO.60.27	700.0	L84
Skin ulcer	DE.02.51	DE.01.83	707.0	L98.4
Black heel (Talon noir)	DE.02.52	DE.02.83	700.0	R23
Tinea pedis (athlete's foot)	DE.03.51	DE.01.75	709.8	B35.3
Tinea cruris (jock itch)	DE.03.52		709.8	B35.6
Tinea corporis / capitis / Ringworm	DE.03.53		709.8	B35.4
Tinea versicolor	DE.03.54		709.8	B36.0
Scabies	DE.04.51	DE.02.75	133.0	B86
Pediculosis (lice)	DE.04.52		132.0	B85.2
Herpes simplex / genitalis	DE.05.51		054.9	A60.9
Herpes gladiatorum	DE.05.52	DE.03.75	054.0	B00
Molluscum contagiosum	DE.05.53	DE.04.75	078.0	B08.1
Warts (other than plantar)	DE.05.54	DE.05.75	686.8	B07
Plantar warts	DE.05.55		709.8	B07
Cellulitis	DE.06.51	DE.06.75	682.9	L03
Folliculitis	DE.06.52		686.0	L73.9
Boil, Abcess, Furuncle (bacterial)	DE.06.53	DE.07.75	686.0	L02
Impetigo / staphylococcal skin infection	DE.06.54	DE.08.75	694.9	L01
Methicillin Resistant Staphylococcus Aureus (MRSA)	DE.06.55	DE.09.75	686.9	U80.1
Acne vulgaris	DE.06.56	DE.03.74	686.0	L70.0
Eczema	DE.07.51	DE.02.74	701.8	L20
Contact dermatitis	DE.07.52	DE.01.74	692.8	L25.9
Allergic reaction - Hives	DE.07.53	DE.01.71	702.8	L50.0
Pityriasis Rosea	DE.07.54	DE.03.83	696.3	L42
Irregular mole / skin lesion	DE.07.55	DE.01.76	216.9	R23
Other elbow injury	EL.00.00	EL.90.00	841.9	S53.4
Elbow contusion	EL.00.23	EL.60.24	841.8	S50.0
Elbow laceration	EL.00.24	EL.60.25	873.0	S51.0
Elbow abrasion	EL.00.25	EL.60.26	916.0	T14.1
Elbow neoplasm	EL.00.42		841.8	D48.0
Lateral epicondyle contusion	EL.11.23	EL.34.24	726.3	S50.0
Lateral epicondyopathy (tennis elbow)	EL.11.26	EL.11.28	726.3	M77.1
Medial epicondyle contusion	EL.12.23	EL.33.24	726.3	S50.0
Medial epicondylopathy (golfers' elbow)	EL.12.26	EL.12.28	726.3	M77.0
Triceps tendinopathy	EL.13.26	EL.13.28	726.3	S46.3
Biceps tendinopathy	EL.14.26	EL.14.28	726.3	M75.2
Elbow reflex sympathetic dystrophy	EL.20.41	EL.20.43	955.7	M79.6
Elbow neuroma	EL.20.44	EL.20.41	955.7	G56.9
Ulnar nerve subluxation	EL.21.11	EL.21.39	955.2	S54.0
Entrapment neuropathy / javelin elbow	EL.21.51	EL.22.39	955.2	M79.6
Median nerve injury	EL.22.00	EL.23.39	955.1	S54.1
Radial nerve injury	EL.23.00	EL.24.39	955.3	S54.2
Posterior interosseous nerve entraptment	EL.24.51	EL.25.39	955.3	S54.8
Supracondylar humeral fracture	EL.32.13	EL.32.13	812.4	S42.4
Medial epicondyle avulsion fracture	EL.33.14	EL.33.14	812.4	S42.4
Medial epicondyle growth plate / physeal injury	EL.33.20	EL.33.20	812.4	S42.4
Lateral epicondyle avulsion fracture	EL.34.14	EL.34.14	812.4	S42.4
Lateral epicondyle growth plate / physeal injury	EL.34.20	EL.34.20	812.4	S42.4
Radial head fracture	EL.35.13	EL.35.13	813.0	S52.1
Coronoid fracture	EL.36.13	EL.36.13	813.0	S52.0
Olecranon avulsion fracture	EL.37.14	EL.37.14	813.0	S52.0
Elbow sprain -ill defined	EL.40.01	EL.50.01	841.8	S53.4
Elbow dislocation	EL.40.10	EL.50.10	832.0	S53.1
Elbow sepsis	EL.40.38	MS.05.75	841.8	M00
Humero-ulnar degenerative/osteoarthritis	EL.41.32	EL.41.34	715.1	M19.8
Humero-ulnar Impingement Syndrome	EL.41.51	EL.41.30	841.8	S53.4
Humero-radial degenerative arthritis	EL.42.32	EL.42.34	715.1	M19.8
Little league elbow / osetochondritis dissecans	EL.42.40	EL.42.37	841.8	M93.2
Radio-ulnar joint disorder	EL.43.00	EL.43.00	841.8	S53.4
Elbow Loose body	EL.43.51	EL.43.21	718.3	M24.0
Ulnar collateral ligament 1° sprain -acute	EL.51.01	EL.51.01	841.1	S53.4
Ulnar collateral ligament 2° sprain -acute	EL.51.02	EL.51.02	841.1	S53.4
Ulnar collateral ligament 3° sprain -acute	EL.51.03	EL.51.03	841.1	S53.4
Ulnar collateral ligament 1° sprain -chronic	EL.51.04	EL.51.04	841.1	S53.4
Ulnar collateral ligament 2° sprain -chronic	EL.51.05	EL.51.05	841.1	S53.4
Ulnar collateral ligament 3° sprain -chronic	EL.51.06	EL.51.06	841.1	S53.4
Annular ligament Injury	EL.52.01	EL.52.01	841.8	S53.4
Olecranon bursitis	EL.61.29	EL.41.31	841.8	M70.3
Septic olecranon bursitis	EL.61.38	MS.06.75	841.8	M71.1
Other endocrinologic illness / disorder	EN.00.00	EN.00.83	259.8	E34
Ovarian Cyst	EN.01.22	EN.01.76	259.8	N83.2
Pituitary Neoplasm	EN.01.42	EN.02.76	194.0	D44.3
Diabetes mellitus	EN.01.51		259.8	E14
Pituitary stress syndrome	EN.01.52	EN.01.82	259.8	E23.6
Short luteal Phase / Anovulation	EN.01.53	EN.02.82	259.8	N97.0
Amenorrhea / Oligomenorrhea	EN.01.54	EN.03.82	259.8	N91.2
Dysmenorrhea / Menorrhagia	EN.01.55	EN.04.82	259.8	N94.6
Delayed menarche	EN.01.56	EN.05.82	259.8	N91.0
Cushing's syndrome	EN.01.57	EN.06.82	259.8	E24
Obesity / overweight	EN.01.58	EN.01.79	259.8	E66
Anabolic Steroid Related	EN.01.59	EN.02.77	259.8	Y42.7
Hypercholesterolemia	EN.02.51	EN.03.77	272.4	E78.0
Hypoglycemia	EN.02.52	EN.01.77	251.2	E16.2
Hyperthyroid	EN.02.53	EN.07.82	246.0	E05
Hypothyroid	EN.02.54	EN.08.82	246.0	E03.9
Acromegaly	EN.02.55	EN.09.82	253.0	E22.0
Other environmental illness / disorder	EV.00.00	MO.00.73	995.8	Z58.8
Hypothermia	EV.01.51	TR.01.72	995.8	T68
Frostbite	EV.01.52	MO.01.73	995.8	T35.7
Hyperthermia / Heat illness (exhaustion, syncope, stroke)	EV.01.53	TR.02.72	995.8	X30
Heat cramps	EV.01.54	TR.03.72	995.8	T67.2
Sunburn	EV.01.55	MO.02.73	995.8	L55
Altitude / mountain sickness	EV.02.51	MO.01.72	995.8	T70.2
High Altitude Pulmonary or Cerebral Edema	EV.02.52	MO.02.72	959.0	T70.2
Nitrogen narcosis	EV.03.51	MO.03.72	995.8	X58
Decompression sickness	EV.03.52	MO.04.72	995.8	T70.3
Drowning	EV.03.53	MO.03.73	995.8	W74
Diving reflex / sudden death	EV.03.54	MO.04.73	995.8	W69
Other forearm injury	FA.00.00	FA.90.00	841.9	S59
Forearm Contusion	FA.00.23	FA.60.24	923.1	S50.1
Forearm laceration	FA.00.24	FA.60.25	873.0	S51
Forearm abrasion	FA.00.25	FA.60.26	916.0	T14.1
Neoplasm of forearm	FA.00.42		841.9	D48.0
Forearm flexor muscle strain	FA.11.07	FA.11.07	841.8	S56
Forearm extensor muscle strain	FA.12.07	FA.12.07	841.8	S56
Brachioradialis strain	FA.13.07	FA.13.07	841.8	S56
Forearm reflex sympathetic dystrophy	FA.20.41	FA.20.43	841.8	M79.6
Radius fracture (including Colles')	FA.32.13	FA.32.13	813.4	S52.5
Radius greenstick fracture	FA.32.19	FA.32.19	813.4	S52.3
Brodie's abscess of Radius	FA.32.35		813.4	M85.6
Ulnar fracture	FA.33.13	FA.33.13	813.4	S52.2
Forearm exertional compartment syndrome	FA.81.36	FA.10.36	841.9	S59.8
Other fluid and electrolyte illness / disorder	FE.00.00	MO.00.77	796.9	E87
Hyponatremia	FE.01.51	MO.05.72	796.9	E87.1
Hypernatremia	FE.01.52	MO.06.72	796.9	E87.0
Dehydration	FE.01.53	MO.07.72	796.9	E87
Other foot injury	FO.00.00	FO.90.00	845.1	S99
Foot contusion	FO.00.23	FO.60.24	845.1	S90.3
Foot laceration	FO.00.24	FO.60.25	873.0	S91
Foot abrasion	FO.00.25	FO.60.26	916.0	T14.1
Foot sepsis	FO.00.38	MS.01.75	845.1	A41
Foot neoplasm	FO.00.42		845.1	D48.0
Extensor digitorum brevis strain	FO.11.07	FO.11.07	845.1	S86.2
Extensor digitorum brevis contusion	FO.11.23	FO.11.24	845.1	S90.3
Intrinsic plantar muscle strain	FO.12.07	FO.12.07	845.1	S96
Morton's neuroma / interdigital neuroma	FO.21.44	FO.21.41	956.5	S94
Plantar nerve injury	FO.22.51	FO.22.39	355.6	G57.6
Calcaneal fracture	FO.31.13	FO.31.13	825.0	S92.0
Calcaneal stress fracture	FO.31.18	FO.31.18	825.0	M84.3
Calcaneal apohysitis/ Sever's disease	FO.31.20	FO.31.20	825.0	M92.6
Heel spur	FO.31.37	FO.31.33	825.0	S99
Calcaneal osteomyelitis	FO.31.39		730.0	S99
Pump bumps	FO.31.51	FO.31.32	845.1	S99
Cuboid fracture	FO.32.13	FO.32.13	825.2	S92
Cuboid stress fracture	FO.32.18	FO.32.18	825.2	M84.3
Navicular fracture	FO.33.13	FO.33.13	825.2	S92
Navicular fracture- non-union	FO.33.15	FO.33.15	825.2	S92
Navicular stress fracture	FO.33.18	FO.33.18	825.2	M84.3
Navicular avascular necrosis	FO.33.34	FO.33.35	825.2	M87
Osteochondritis / Kohler's disease	FO.33.40	FO.46.37	825.2	M93.2
Accessory navicular	FO.33.51	FO.33.23	825.2	S99
Cuneiform fracture	FO.34.13	FO.34.13	825.2	S92
Cuneiform stress fracture	FO.34.18	FO.34.18	825.2	M84.3
First metatarsal fracture	FO.35.13	FO.35.13	825.2	S92.3
Metatarsal fracture (2-4)	FO.36.13	FO.36.13	825.2	S92.3
Metatarsal stress fracture	FO.36.18	FO.36.18	825.2	M84.3
Freiberg's infraction	FO.36.34	FO.36.35	825.2	M92.7
5th metatarsal fracture/ Jones' fracture	FO.37.13	FO.37.13	825.2	S92.3
Styloid process avulsion fracture	FO.37.14	FO.37.14	825.2	S92.3
Sesmoid fracture	FO.38.13	FO.38.13	825.2	S92.9
Sesmoid stress fracture	FO.38.18	FO.38.18	825.2	M84.3
Sesamoiditis	FO.38.31	FO.38.33	825.2	S99
Bipartite sesmoids	FO.38.51	FO.38.42	825.2	S99
Phalyngeal fracture- toes	FO.39.13	FO.39.13	826.0	S92.5
Subtalar dislocation	FO.41.10	FO.51.10	845.1	S93.3
Cuboid subluxation	FO.41.11	FO.52.11	845.1	S99
Tarsal Coalition	FO.41.43	FO.41.30	845.1	S99
Hyperpronation / pes planus	FO.41.51	FO.91.42	734.0	S99
Excessive supination / pes cavus	FO.41.52	FO.92.42	845.1	S99
Sinus Tarsi Syndrome	FO.41.53	FO.93.42	845.1	S99
Tarsal-metatarsal hypomobility	FO.42.43	FO.42.30	845.1	S99
First MTP joint dislocation	FO.43.10	FO.53.10	838.0	S93.1
Turf toe	FO.43.31	FO.44.30	845.1	S99
Metatarsophalangeal joint osteoarthritis	FO.43.32	FO.45.34	715.1	M19.8
Hallux rigidus	FO.43.43	FO.43.30	845.1	M20.2
Hallux valgus / bunion	FO.43.52	FO.95.42	845.1	M20.1
2nd, 3, 4, 5th MTP joint dislocation	FO.44.10	FO.54.10	838.0	S93.1
5th MTP bunionette	FO.44.51	FO.96.42	845.1	S99
Midfoot sprain	FO.45.01	FO.55.01	845.1	S93.6
Lisfranc injury	FO.45.03	FO.56.03	845.1	S99
Plantar fasciitis	FO.51.31	FO.13.33	845.1	S99
Metatarsalgia	FO.52.51	FO.90.42	845.1	S99
Subungal hematoma	FO.80.51	FO.80.24	842.1	S99
Lace syndrome	FO.81.31	FO.81.33	845.1	S99
Fat pad contusion	FO.82.23	FO.42.24	845.1	S90.3
Fat pad Syndrome	FO.82.51	FO.94.42	845.1	S99
Foot blister	FO.83.45	FO.83.27	912.2	L98
Great toe blister	FO.84.45	FO.84.27	912.2	L98
Other toe blister	FO.85.45	FO.85.27	912.2	L98
Other gastrointestinal illness / disorder	GI.00.00	GI.00.83	558.9	K52
Gastrointestinal Neoplasm	GI.00.42	GI.01.76	159.0	D37
Irritable Bowel Syndrome	GI.00.51	GI.03.77	564.1	K58
Allergy Syndrome	GI.00.52	GI.07.71	564.1	T78.4
Stitch	GI.00.53	GI.09.83	536.0	R10.1
Gastroesophageal Reflux (GERD)	GI.01.51	GI.01.83	530.0	K21
Gastritis	GI.01.52	GI.03.74	530.0	K29.7
Stomach Ulcer	GI.02.51	GI.02.83	536.8	K25
Gall Stones	GI.03.51	GI.05.83	574.0	K80
Hepatitis	GI.03.52	GI.07.75	573.0	B17.9
Pancreatic Disease	GI.04.51	GI.06.83	577.0	K86.9
Traveller’s Diarrhea	GI.05.38	GI.01.75	787.9	A09.0
Duodenal Ulcer	GI.05.51	GI.06.75	532.0	K26
Celiac Disease	GI.05.52	GI.01.77	579.0	K90.0
Crohn’s Disease	GI.05.53	GI.04.77	558.9	K50.9
Malabsorbtion Syndrome	GI.05.54	GI.02.77	579.0	K90
Runner’s Diarrhea	GI.06.38	GI.02.75	787.9	K59.1
Other Colon Infection	GI.06.51	GI.03.75	558.9	S36.5
Appendicitis	GI.06.52	GI.04.75	541.0	K37
Ulcerative Colitis	GI.06.53	GI.07.83	558.9	K51
Superior Mesenteric Disease	GI.06.54	GI.03.83	558.9	I77
Gastroenteritis	GI.07.38	GI.05.75	558.0	A09.9
Hemorrhoids	GI.07.51	GI.01.78	455.0	I84.5
Anal Fissure	GI.07.52	GI.08.83	565.0	K60.2
Other GU illness / disorder	GU.00.00	GU.00.83	599.9	N39
Genitourinary Neoplasm	GU.00.42	GU.01.76	179.0	D41.9
Myoglobinuria (Rhabdomyolysis)	GU.00.51	GU.02.72	791.3	R82.1
Pyelonephritis	GU.01.38	GU.01.75	590.8	N11.0
Exercise Induced Hematuria	GU.01.51	GU.01.72	599.7	R31
Renal Stone	GU.01.52	GU.02.83	788.0	N20.0
Athletic Pseudonephritis	GU.01.53	GU.05.83	590.9	N06.9
Renal Failure	GU.01.54	GU.07.83	593.0	N17.9
Cystitis	GU.03.38	GU.03.75	595.0	N30
Sexually Transmitted Disease	GU.04.38	GU.04.75	099.0	A64
Testicle Neoplasm	GU.05.42	GU.02.76	186.0	D40.1
Epididymitis	GU.05.51	GU.05.75	604.0	N45
Testicle Torsion	GU.05.52	GU.03.83	608.2	N44
Ovary Neoplasm	GU.06.42	GU.03.76	183.0	D39.1
Polycyctic Ovaries	GU.06.51	GU.01.83	753.0	E28.2
Ovarian Failure	GU.06.52	GU.04.83	256.0	E28.3
Pregnancy	GU.06.53	GU.06.83	v22.2	Z32.1
Vaginal Discharge	GU.06.54	GU.08.83	616.1	N89
Other hand injury	HA.00.00	HA.90.00	842.1	S69
Hand contusion	HA.00.23	HA.60.24	923.2	S60.2
Hand laceration	HA.00.24	HA.60.25	873.0	S61
Hand abrasion	HA.00.25	HA.60.26	916.0	T14.1
Hand neoplasm	HA.00.42		842.1	D48.0
Extensor expansion tendon tear/rupture	HA.11.09	HA.11.09	842.1	S66.9
Extensor expansion tendon laceration	HA.11.24	HA.11.25	883.0	S66
Flexor digitorum superficialus tear/rupture	HA.12.09	HA.12.09	842.1	S66.1
Trigger finger	HA.12.51	HA.12.28	842.1	M65.3
Flexor digitorum profundus tear/rupture	HA.13.09	HA.13.09	842.1	S66.1
Dupuytren's contacture	HA.14.51	HA.14.28	842.1	M72.0
Intrinsic muscle strain	HA.15.07	HA.15.07	842.1	S66
Hand reflex sympathetic dystrophy	HA.20.41	HA.20.43	842.1	M79.6
First metacarpal fracture	HA.32.13	HA.32.13	815.0	S62.8
First metacarpal fracture/dislocation (Bennett's)	HA.32.16	HA.32.16	815.0	S62.8
Second metacarpal fracture	HA.33.13	HA.33.13	815.0	S62.8
Other metacarpal fracture	HA.34.13	HA.34.13	815.0	S62.8
Thumb phalanx fracture	HA.35.13	HA.35.13	815.0	S62.8
Proximal phalyngeal fracture of fingers	HA.36.13	HA.36.13	815.0	S62.8
Middle phalyngeal fracture of fingers	HA.37.13	HA.37.13	815.0	S62.8
Distal phalyngeal fracture of fingers	HA.38.13	HA.38.13	815.0	S62.8
First metacarpophalyngeal joint dislocation	HA.41.10	HA.52.10	834.0	S63
Finger metacarpophalyngeal joint dislocation	HA.42.10	HA.51.10	834.0	S63
Thumb interphalyngeal joint dislocation	HA.43.10	HA.54.10	834.0	S63
Finger distal interphalyngeal joint dislocation	HA.44.10	HA.56.10	834.0	S63
Finger proximal interphalyngeal joint dislocation	HA.45.10	HA.55.10	834.0	S63
Ulnar collateral ligament 1° sprain -acute (skier's thumb)	HA.51.01	HA.51.01	842.1	S63
Ulnar collateral ligament 2° sprain -acute (skier's thumb)	HA.51.02	HA.51.02	842.1	S63
Ulnar collateral ligament 3° sprain -acute (skier's thumb)	HA.51.03	HA.51.03	842.1	S63
Ulnar collateral ligament 1° sprain -chronic	HA.51.04	HA.51.04	842.1	S63
Ulnar collateral ligament 2° sprain -chronic	HA.51.05	HA.51.05	842.1	S63
Ulnar collateral ligament 3° sprain -chronic	HA.51.06	HA.51.06	842.1	S63
Other metacarpophalangeal sprain	HA.52.01	HA.53.01	842.1	S63
Finger Proximal interphalangeal joint sprain	HA.53.01	HA.55.01	842.1	S63
Finger Distal interphalangeal joint sprain	HA.54.01	HA.56.01	842.1	S63
Subungal hematoma	HA.80.51	HA.62.24	842.1	L60.8
Nail avulsion	HA.80.52	HA.62.09	842.1	L60.8
Systemic disease of nail	HA.80.53	DE.04.83	842.1	L60.8
Hand blister	HA.81.45	HA.60.27	919.2	L98
Finger blister	HA.82.45	HA.61.27	919.2	L98
Palm infection	HA.90.38	MS.07.75	842.1	S69.8
Other injury to head	HE.00.00	HE.90.00	784.9	S09
Head Laceration	HE.00.24	HE.60.25	873.0	S01
Head neoplasm	HE.00.42	UO.91.76	195.0	D48.7
Scalp laceration	HE.01.24	HE.61.25	873.0	S01.0
Scalp abrasion	HE.01.25	HE.61.26	910.0	S01.0
Facial contusion	HE.02.23	HE.60.24	910.0	S09.9
Facial laceration	HE.02.24	HE.62.25	873.4	S01.9
Facial abrasion	HE.02.25	HE.62.26	910.0	T14.1
Other eye injury	HE.03.00	HE.80.00	371.0	H57
Corneal abrasion	HE.03.25	HE.80.26	371.8	S05.0
Detached retina	HE.03.51	HE.81.46	361.0	H33
Lens dislocation/subluxation	HE.03.52	HE.82.46	364.9	H27.1
Stye	HE.03.53	OP.01.75	374.8	H01.9
Conjunctivitis	HE.03.54	OP.02.75	372.0	H10
Other Ear Injury	HE.04.00	HE.91.00	959.0	H93.9
Otitis media	HE.04.38	OT.01.75	382.9	H66.9
Otitis externa = swimmer's ear	HE.04.51	OT.02.75	380.2	H60
Cauliflower ear	HE.04.52	HE.61.24	738.7	M95.1
Tinnitus / barotrauma	HE.04.53	HE.83.46	384.8	H93.1
Traumatic perforated ear drum	HE.04.54	HE.84.46	384.8	H72
Dizziness/ Vertigo	HE.04.55	OT.01.83	384.8	H81.9
Labyrinthitis	HE.04.56	OT.02.83	379.5	H83.0
Nasal fracture	HE.05.13	HE.35.13	802.0	S02.2
Nasal contusion	HE.05.23	HE.32.24	920.0	S00.3
Epistaxis	HE.05.51	HE.71.45	784.7	S09.8
Sinusitis	HE.05.52	HE.07.75	473.9	J01
Chronic rhinitis	HE.05.53	RE.04.83	784.9	J31.0
Mouth /throat disorder	HE.06.00	HE.92.00	528.9	R07.0
Tongue laceration	HE.06.24	HE.63.25	529.9	S00.5
Buccal membrane disorder	HE.06.51		528.9	S00.5
Other dental injury	HE.07.00	HE.93.00	521.9	S09.8
Teeth fracture	HE.07.13	HE.32.13	521.9	S02.5
Concussion	HE.21.51	HE.21.40	851.0	S06.0
Post concussion syndrome	HE.21.52	HE.22.40	851.0	F07.2
Structural brain injury	HE.21.53	HE.24.40	851.0	S06.3
Subdural / epidural hematoma	HE.21.54	HE.23.40	349.8	S06
Facial fracture	HE.30.13	HE.33.13	802.0	S02
Skull fracture	HE.32.13	HE.34.13	800.0	S02
TMJ disorder	HE.51.51	HE.51.30	524.6	K10.9
Other hip injury	HI.00.00	HI.90.00	959.6	S79.9
Hip Contusion	HI.00.23	HI.60.24	924.0	S70.0
Hip laceration	HI.00.24	HI.60.25	873.0	S71.0
Hip abrasion	HI.00.25	HI.60.26	916.0	S71.0
Hip neoplasm	HI.00.42		843.8	D48.0
Testicular Contusion	HI.01.23	HI.80.46	922.4	S30.2
Iliopsoas strain	HI.11.07	HI.11.07	843.8	S76.0
Gluteus maximius strain	HI.12.07	HI.12.07	843.8	S39.0
Gluteus maximius tear	HI.12.09	HI.12.09	843.8	S73.1
Gluteus medius strain	HI.13.07	HI.13.07	843.8	S73.1
Gluteus medius tear	HI.13.09	HI.13.09	843.8	S73.1
Lateral rotator strain	HI.14.07	HI.14.07	843.8	S73.1
Medial rotator strain	HI.15.07	HI.15.07	843.8	S73.1
Hip reflex sympathetic dystrophy	HI.20.41	HI.20.43	956.5	M79.6
Hip neuroma	HI.20.44	HI.20.41	956.5	G57.9
Piriformis Syndrome	HI.20.51	HI.20.42	956.5	G57.9
Meralgia paresthetica	HI.21.51	HI.21.42	956.5	G57.1
Obturator nerve entrapment	HI.22.51	HI.22.39	956.5	G57.9
ASIS apophysitis / avulsion	HI.32.20	HI.32.20	732.6	S79
AIIS apophysitis / avulsion	HI.33.20	HI.34.20	732.6	S79
Femoral neck / head fracture	HI.34.13	HI.34.13	820.0	S72.0
Femoral neck stress fracture	HI.34.18	HI.34.18	820.0	M84.3
Slipped capital femoral epiphysis	HI.35.20	HI.35.20	732.2	M93.0
Legg-Perthes	HI.35.34	HI.35.35	732.1	M91.1
Intertrochanteric fracture	HI.36.13	HI.36.13	820.2	S72.0
Hip degenerative/osteoarthritis	HI.40.32	HI.40.34	715.1	M16.9
Hip sepsis	HI.40.38		843.9	M00
Hip chondromalacia	HI.40.51	HI.40.21	715.1	M93.9
Acetabular fracture	HI.41.13	HI.37.13	808.0	S32.4
Hip capsulitis	HI.42.31	HI.43.30	843.9	S79
Hip loose body	HI.43.51	HI.44.30	843.9	M24.0
Hip labral tear	HI.45.09	HI.45.21	843.9	S79.9
Greater trochanteric bursitis / snapping hip syndrome	HI.61.29	HI.41.31	843.8	M70.6
Iliopsoas bursitis	HI.62.29	HI.42.31	843.8	M70.7
Hip arterial disorder	HI.71.00	HI.71.45	843.8	S75
Hip venous disorder	HI.72.00	HI.72.45	843.8	S75
Hip femoral acetabular impingement	HI.80.51	HI.40.30	843.8	S79
Other infectious illness / disorder	ID.00.00	MO.00.75	136.8	B99
Non-specific viral Illness	ID.01.51	MO.01.75	491.9	B34
Influenza	ID.01.52	MO.02.75	487.1	J11
Mononucleosis (EBV) / CMV	ID.01.53	MO.03.75	136.8	B27.1
Shingles (herpes zoster) - non trunk	ID.01.54	MO.04.75	053.9	B02
Lymphadenitis / lymphangitis	ID.01.55	MO.05.75	136.9	I89.1
Post Viral Fatigue	ID.01.56	MO.06.75	780.7	G93.3
HIV related	ID.02.51	MO.08.75	042.0	B24
Other knee injury	KN.00.00	KN.90.00	844.9	S83.6
Knee contusion	KN.00.23	KN.60.24	924.1	S80.0
Knee laceration	KN.00.24	KN.60.25	873.0	S81.0
Knee abrasion	KN.00.25	KN.60.26	916.0	T14.1
Other rheumatologic condition of knee	KN.00.33		844.8	M79.0
Neoplasm-knee	KN.00.42		844.8	D48.0
Biceps Femoris tendinopathy	KN.11.26	KN.11.28	844.8	M76.9
Pes anserine tendinopathy	KN.12.26	KN.12.28	844.8	M76.9
Iliotibial band friction syndrome	KN.13.31	KN.13.28	844.8	M76.3
Patellar tendon tear/rupture	KN.14.09	KN.14.09	844.8	S76.1
Patellar tendinopathy	KN.14.26	KN.14.28	844.8	M76.5
Patellar tendon cystic degeneration	KN.14.51	KN.14.33	844.8	S76.1
Quadriceps tendon tear/rupture	KN.15.09	KN.15.09	844.8	S76.1
Quadriceps tendinopathy	KN.15.26	KN.15.28	844.8	M76.5
Popliteus tendinopathy	KN.16.26	KN.16.28	844.8	M76.9
Knee reflex sympathetic dystrophy	KN.20.41	KN.20.43	956.5	M79.6
Saphenous neuroma	KN.21.44	KN.21.41	956.5	G57.9
Intrarticular fracture of femur	KN.32.13	KN.32.13	821.2	S72.0
Tibial plateau fracture	KN.33.13	KN.33.13	823.0	S82.1
Tibial spine avulsion	KN.33.14	KN.33.14	823.0	S82.1
Osgood-Schlatter's Disease	KN.33.20	KN.33.20	823.0	M92.5
Fibular head fracture	KN.34.13	KN.34.13	823.0	S82.4
Patellar fracture	KN.35.13	KN.35.13	822.0	S82.0
Patellar avulsion fracture	KN.35.14	KN.35.14	822.0	S82.0
Patellar osteochondral fracture	KN.35.17	KN.45.17	822.0	S82.0
Sinding-Larson-Johanson Syndrome	KN.35.20	KN.35.20	732.8	M92.4
Bipartite or multipartite patella	KN.35.51	KN.35.42	844.8	M22.8
Patella alta	KN.35.52	KN.36.42	844.8	M22.8
Patella infera	KN.35.53	KN.37.42	844.8	M22.8
Knee sepsis	KN.40.38		844.8	M00
Knee synovitis	KN.41.28	KN.40.30	844.8	M65
Knee generalized osteoarthritis	KN.41.32	KN.40.34	844.8	M17
Arthrofibrosis	KN.41.43	KN.41.30	844.8	M17
Baker's Cyst	KN.41.51	KN.41.23	844.8	M71.2
Plica Syndrome	KN.41.52		844.8	M65
Fat pad syndrome	KN.41.53	KN.47.30	844.8	M79.4
Patellofemoral dislocation	KN.42.10	KN.55.10	836.3	S83.0
Patellofemoral subluxation	KN.42.11	KN.55.11	836.3	M22.8
Patellofemoral functional instability	KN.42.12	KN.55.12	836.3	M22.8
Patellofemoral osteoarthritis	KN.42.32	KN.42.34	715.1	M17
Patellofemoral osteochondritis dissecans (OCD)	KN.42.40	KN.42.37	715.1	M93.2
Patellofemoral pain syndrome	KN.42.51	KN.42.42	715.1	M22.4
Lateral hyperpressure syndrome	KN.42.52	KN.42.38	715.1	M22.8
Post-traumatic patellofemoral pain	KN.42.53	KN.42.33	715.1	M22.8
Patellofemoral chondromalacia - Grade I	KN.42.54	KN.42.21	717.7	M22.4
Patellofemoral chondromalacia - Grade II	KN.42.55		717.7	M22.4
Patellofemoral chondromalacia - Grade III	KN.42.56		717.7	M22.4
Patellofemoral chondromalacia - Grade IV	KN.42.57		717.7	M22.4
Tibial-femoral dislocation	KN.43.10	KN.56.10	836.5	S83.1
Tibial-femoral Functional Instability	KN.43.12	KN.56.12	836.5	S83.4
Lateral compartment osteoarthritis	KN.43.32	KN.43.34	715.1	M17
Femoral osteochondritis dissecans (OCD)	KN.43.40	KN.43.37	732.4	M93.2
Medial compartment osteoarthritis	KN.43.51		715.1	M17
Femoral osteonecrosis	KN.43.53	KN.33.35	732.4	M87
Proximal tibio-fibular dislocation	KN.44.10	KN.57.10	836.5	S83
Proximal tibio-fibular subluxation	KN.44.11	KN.57.11	836.5	S83.4
Proximal tibio-fibular degenerative arthritis	KN.44.32	KN.44.34	715.1	M17
Medial meniscus / meniscal tear	KN.45.09	KN.45.21	717.3	S83.2
Medial meniscus / meniscal cyst	KN.45.51		717.3	S83.2
Medial discoid meniscus	KN.45.52		717.3	M23.1
Medial meniscus / meniscal repair failure	KN.45.53		717.3	S83.2
Lateral meniscus / meniscal tear	KN.46.09	KN.46.21	717.4	S83.2
Lateral meniscus / meniscal cyst	KN.46.51		717.4	S83.2
Lateral discoid meniscus	KN.46.52		717.4	M23.1
Lateral meniscal repair failure	KN.46.53		717.4	S83.2
Medial collateral ligament 1° sprain- acute	KN.51.01	KN.51.01	844.1	S83
Medial collateral ligament 2° sprain- acute	KN.51.02	KN.51.02	844.1	S83
Medial collateral ligament 3° sprain- acute	KN.51.03	KN.51.03	844.1	S83
Medial collateral ligament 1° sprain- chronic	KN.51.04	KN.51.04	844.1	S83
Medial collateral ligament 2° sprain- chronic	KN.51.05	KN.51.05	844.1	S83
Medial collateral ligament 3° sprain- chronic	KN.51.06	KN.51.06	844.1	S83
Pelligrini-Steida Syndrome	KN.51.51	KN.50.33	844.1	M61.5
Lateral collateral ligament 1° sprain- acute	KN.52.01	KN.52.01	844.0	S83
Lateral collateral ligament 2° sprain- acute	KN.52.02	KN.52.02	844.0	S83
Lateral collateral ligament 3° sprain- acute	KN.52.03	KN.52.03	844.0	S83
Lateral collateral ligament 1° sprain- chronic	KN.52.04	KN.52.04	844.0	S83
Lateral collateral ligament 2° sprain- chronic	KN.52.05	KN.52.05	844.0	S83
Lateral collateral ligament 3° sprain- chronic	KN.52.06	KN.52.06	844.0	S83
Anterior cruciate ligament partial tear- acute	KN.53.02	KN.53.02	844.2	S83.5
Anterior cruciate ligament complete tear- acute	KN.53.03	KN.53.03	844.2	S83.5
Anterior cruciate ligament partial tear- chronic	KN.53.05	KN.53.05	844.2	S83.5
Anterior cruciate ligament complete tear- chronic	KN.53.06	KN.53.06	844.2	S83.5
Anterior cruciate ligament graft rupture	KN.53.09	KN.53.09	844.2	S83.5
Anterior cruciate ligament graft failure	KN.53.51		844.2	S83.5
Posterior cruciate ligament partial tear- acute	KN.54.02	KN.54.02	844.2	S83.5
Posterior cruciate ligament complete tear- acute	KN.54.03	KN.54.03	844.2	S83.5
Posterior cruciate ligament partial tear- chronic	KN.54.05	KN.54.05	844.2	S83.5
Posterior cruciate ligament complete tear- chronic	KN.54.06	KN.54.06	844.2	S83.5
Prepatellar bursitis	KN.61.29		844.8	M70.5
Prepatellar septic bursitis	KN.61.38		844.8	M70.5
Superficial infrapatellar bursitis	KN.62.29		844.8	M70.5
Deep infrapatellar bursitis	KN.63.29	KN.41.31	844.8	M70.5
Medial collateral ligament bursitis	KN.64.29		844.8	M70.5
Pes anserine bursitis	KN.65.29		844.8	M70.5
Loose body of knee	KN.66.51	KN.40.21	844.8	M23.4
Other leg injury	LE.00.00	LE.90.00	844.9	S86.9
Leg contusion	LE.00.23	LE.60.24	924.1	S80.1
Leg laceration	LE.00.24	LE.60.25	873.0	S81
Leg abrasion	LE.00.25	LE.60.26	916.0	S81
Leg neoplasm	LE.00.42		844.8	D48.0
Other leg muscle strain	LE.10.07	LE.10.07	844.8	S86
Gastrocnemius strain	LE.11.07	LE.11.07	844.8	S86.1
Gastrocnemius spasm	LE.11.08	LE.11.08	844.8	R25.2
Gastrocemius Tear/Rupture	LE.11.09	LE.11.09	844.8	S86.1
Gastrocnemius cyst	LE.11.51	LE.11.22	844.8	M62
Soleus strain	LE.12.07	LE.12.07	844.8	S86.1
Soleus spasm	LE.12.08	LE.12.08	844.8	R25.2
Tibialis posterior strain	LE.13.07	LE.13.07	844.8	S86.1
Tibialis anterior strain	LE.14.07	LE.14.07	844.8	S86.2
Tibialis anterior tendon rupture	LE.14.09	LE.14.09	844.8	S86.2
Peroneus strain	LE.15.07	LE.15.07	844.8	S86.3
Achilles tendon rupture	LE.16.09	LE.16.09	844.8	S86.0
Achilles tendinopathy	LE.16.26	LE.16.28	844.8	M76.6
Achilles tenosynovitis	LE.16.27	LE.16.29	844.8	S86.0
Achilles tendon cystic degeneration	LE.16.51	LE.16.33	844.8	S86.0
Achilles enthesopathy	LE.16.52		844.8	M76.6
Leg reflex sympathetic dystrophy	LE.20.41	LE.20.43	956.3	M79.6
Common peroneal nerve injury	LE.21.51	LE.21.39	956.3	S84.1
Superficial peroneal nerve injury/Entrapment	LE.22.51	LE.22.39	956.3	S84.1
Deep peroneal nerve injury	LE.23.51	LE.23.39	956.3	S84.1
Sural nerve entrapment	LE.24.51	LE.24.39	956.3	S84.8
Tibial fracture	LE.32.13	LE.32.13	823.2	S82.2
Tibial fracture- non-union	LE.32.15	LE.32.15	823.2	M84.1
Tibial stress fracture	LE.32.18	LE.32.18	823.2	M84.3
Tibial greenstick fracture	LE.32.19	LE.32.19	823.2	S82.2
Tibial periostitis	LE.32.30	LE.32.32	823.2	S86
Brodie's abscess of tibia	LE.32.35		823.2	M85.6
Tibial exostosis	LE.32.37	MS.02.83	823.2	M89
Tibial osteomyelitis	LE.32.39		823.2	M86
Medial tibial stress syndrome	LE.32.51	LE.32.42	823.2	M84.3
Fibular fracture	LE.33.13	LE.33.13	823.2	S82.9
Fibular stress fracture	LE.33.18	LE.33.18	823.2	M84.3
Fibular greenstick fracture	LE.33.19	LE.33.19	823.2	S82.9
Fibular periostitis	LE.33.30	LE.33.32	823.2	S86
Brodie's abscess of fibula	LE.33.35		823.2	M85.6
Fibular osteomyelitis	LE.33.39	MS.04.75	823.2	M86
Popliteal artery entrapment	LE.71.51	LE.71.45	904.4	S85.0
Leg thrombosis/atherosclerosis	LE.71.52	CV.03.78	904.4	I82.8
Varicose veins - leg	LE.72.51	CV.04.78	904.4	I83
Leg deep vein thrombosis	LE.72.52	CV.05.78	904.4	I82.8
Leg venous insufficiency	LE.72.53	CV.06.78	904.4	I87.2
Anterior exertional compartment syndrome	LE.81.36	LE.10.36	844.8	S89.8
Lateral exertional compartment syndrome	LE.82.36	LE.11.36	844.8	S89.8
Superficial posterior exertional compartment syndrome	LE.83.36	LE.17.36	844.8	S89.8
Deep posterior exertional compartment syndrome	LE.84.36	LE.13.36	844.8	S89.8
Acute compartment syndrome	LE.84.51	LE.12.36	844.8	S89.8
Other Lumbar injury	LP.00.00	LS.90.00	847.2	S33.7
Pelvis/Low Back Contusion	LP.00.23	LS.90.24	922.3	S30.0
Low back laceraton	LP.00.24	LS.60.25	873.0	S31.0
Low back abrasion	LP.00.25	LS.60.26	916.0	S31.0
Lumbar neoplasm	LP.00.42	UO.97.76	847.2	D48.0
Non-specific low back pain / mechanical pain	LP.00.51	LS.90.42	847.2	S33.5
Paralumbar muscle strain	LP.13.07	LS.13.07	847.2	S39.0
Lumbar reflex sympathetic dystrophy	LP.20.41	LS.20.43	956.5	M79.6
Lumbar neuroma	LP.20.44	LS.20.41	956.5	S34.2
Lumbar spinal cord compression/transection	LP.21.10	LS.22.40	956.5	S34.0
Lumbar spinal contusion/concussion	LP.21.23	LS.21.40	956.5	S34.0
Sciatica	LP.21.51	LS.21.39	956.5	M51.1
Lumbar nerve root impingement	LP.21.52	LS.22.39	956.5	S34.2
Pudendal nerve injury	LP.22.00	LS.23.39	956.5	S34.8
Perineal nerve injury	LP.23.00	LS.24.39	956.5	S34.8
Lumbar spine fracture	LP.31.13	LS.31.13	724.8	S32.0
Pars stress fracture/ reaction	LP.31.18	LS.31.18	724.8	M84.3
Spondylolysis	LP.31.51	LS.32.18	724.8	M43.0
Spodylolisthesis	LP.31.52	LS.33.18	724.8	M43.1
Kissing spine	LP.31.53	LS.31.33	724.8	M19.9
Spinal stenosis	LP.31.55	LS.31.00	724.8	M19.9
Sacrum / coccyx fracture	LP.32.13	LS.32.13	724.6	S32.1
coccydynia	LP.32.51	LS.32.33	724.8	M53.3
Ilium fracture	LP.33.13	HI.33.13	724.8	S32.3
ASIS avulsion fracture	LP.33.14	HI.33.14	724.8	S32.8
Ilium growth plate / physeal injury	LP.33.20	HI.33.20	724.8	S32.3
Hip Pointer (Iliac Crest Contusion)	LP.33.23	HI.33.24	724.8	S30.0
Ischium fracture	LP.34.13	TH.34.13	724.8	S32.8
Ischium avulsion fracture	LP.34.14	TH.34.14	724.8	S32.8
Ischium growth plate / physeal injury	LP.34.20	TH.34.20	724.8	S32.8
Ischial bursitis	LP.34.29	TH.44.31	727.3	S79
Pubic Fracture	LP.35.13	HI.35.13	808.2	S32.5
Pubic stress fracture	LP.35.18	HI.35.18	724.8	M84.3
Osteitis Pubis	LP.35.51	HI.35.32	724.8	M89
Lumbar facet osteoarthritis	LP.41.32	LS.41.34	715.1	M19.9
Facet syndrome	LP.41.51	LS.41.30	724.8	S33.5
Lumbar degenerative disc disease	LP.42.51	LS.42.42	722.5	M51.3
Lumbar disc herniation	LP.42.52	LS.42.33	722.1	M51.1
Sacroiliac asymmetry/dysfunction	LP.43.51	LS.43.30	846.1	S33.6
Symphysis Pubis Diastasis	LP.44.51	HI.54.09	848.8	M89
Non-Specific Injury	MS.00.00	OO.90.00	781.9	T14
Non-Specific Cramps	MS.00.08	MS.01.72	845.1	R25.2
Contusion	MS.00.23	OO.60.24	845.1	T14
Skin laceration - other	MS.00.24	OO.60.25	873.0	T14.1
Skin abrasion	MS.00.25	OO.60.26	916.0	T14.1
Multiple trauma (major)	MS.00.51	OO.91.00	781.9	T14.9
Multiple MSK injuries	MS.00.52	OO.92.00	781.9	T14.9
Other neck injury	NE.00.00	NE.90.00	723.8	S19.9
Neck / throat contusion	NE.00.23	NE.90.24	920.0	S10.0
Neck laceration	NE.00.24	NE.60.25	873.0	S11
Neck abrasion	NE.00.25	NE.60.26	916.0	S11
Neck Neoplasm	NE.00.42	UO.92.76	195.0	D48.7
Cervical strain / whiplash	NE.10.07	NE.10.07	723.8	S16
Torticolis / spasm	NE.10.08	NE.10.08	723.8	R25.2
Trapezius strain	NE.11.07	NE.11.07	723.8	S16
Trapezius trigger points	NE.11.51	NE.11.08	723.8	S16
Suboccipital muscle strain	NE.12.07	NE.12.07	723.8	S16
Neck radiculopathy	NE.20.51	NE.20.42	723.8	S14
Cervical spinal cord compression/transection	NE.21.10	NE.22.40	952.0	S14.0
Cervical spinal contusion/concussion	NE.21.23	NE.21.40	952.0	S14.0
Brachial plexus syndrome (Stinger)	NE.21.51	NE.21.39	353.0	S14.3
11th cranial nerve injury	NE.22.51	NE.22.39	353.0	S04
Cervical spine fracture	NE.31.13	NE.31.13	723.8	S12
Cervical spinal stenosis	NE.31.53	NE.31.33	723.0	M19.8
Cervical facet osteoarthritis	NE.41.32	NE.41.34	715.1	M19.8
Cervical facet syndrome	NE.41.51	NE.41.30	723.8	M19.8
Cervical degenerative disc disease	NE.42.51	NE.42.30	722.4	M19.8
Cervical disc herniation	NE.42.52	NE.42.33	722.0	M50
Thoracic Outlet Syndrome	NE.70.51	NE.70.45	723.8	M19.8
Other nervous system illness / disorder	NS.00.00	NS.00.83	349.9	G98
Neurologic Neoplasm	NS.00.42	NS.00.76	195.0	D43.7
Peripheral neuropathy	NS.01.51	NS.01.83	349.8	G99.8
Headache	NS.01.52	NS.03.83	784.0	R51
Migraine	NS.01.53	NS.05.83	346.0	G43
Multiple sclerosis	NS.01.54	NS.02.83	349.8	G35
Convulsive disorder / epilepsy	NS.01.55	NS.06.83	345.0	G40
Vertigo / Menier's disease	NS.01.56	NS.07.83	780.4	H81.3
Polyneuritis / Guillan-Barre Syndrome	NS.01.57	NS.08.83	349.8	G61.0
Post-polio Syndrome	NS.01.58	NS.09.83	349.8	G14
Stroke	NS.22.52	NS.01.78	349.8	I64
Meningitis	NS.23.38	NS.01.75	322.9	G03.9
Idiopathic brachial neuritis	NS.24.51	NS.01.74	955.7	M79.2
Other psychiatric illness / disorder	PS.00.00	PS.00.83	349.9	Z03.2
Depression /bipolar disorder	PS.00.51	PS.01.83	349.8	F31.3
Anxiety	PS.00.52	PS.02.83	300.9	F41.9
Anorexia nervosa / bulemia	PS.00.53	PS.01.77	783.9	F50.0
Insomnia, jet lag and sleep disturbance	PS.00.54	PS.03.83	349.8	G47.0
Attention deficit hyperactivity disorder	PS.00.55	PS.01.80	314.0	F90.0
Overtraining syndrome	PS.01.51	PS.04.83	780.7	R53
Burn-out, fatigue syndrome	PS.02.52	PS.06.83	780.7	R53
Other respiratory illness / disorder	RE.00.00	RE.00.83	519.9	J98
Respiratory neoplasm	RE.00.42	RE.01.76	162.0	D38.6
Upper Respiratory Tract Infection - Viral	RE.01.38	RE.01.75	465.9	J06.9
Tonsilitis	RE.02.38	RE.02.75	463.0	J03
Quinsy (Peritonsillar Abscess)	RE.03.38	RE.03.75	786.9	J36
Pharyngitis	RE.04.38	RE.04.75	462.0	J02.9
Bronchitis / lower respiratory tract infection	RE.05.38	RE.05.75	490.0	J20
Exercise Induced Asthma (EIA/EIB)	RE.05.51	RE.01.74	493.9	J45.1
Asthma	RE.05.52	RE.02.74	493.1	J45
Pneumothorax - Spontaneous	RE.06.52	RE.01.83	512.0	J93
Cystic fibrosis	RE.06.53	RE.02.83	786.9	E84
COPD- Chronic Obstrucitve Pulmonary Disease	RE.06.54	RE.03.83	786.9	J44.9
Pneumonia	RE.06.55	RE.06.75	481.0	J18
Other Rheumatic illness / disorder	RM.00.00	MS.01.74	716.8	M36.8
Osteoporosis	RM.01.51	MS.01.79	733.0	M81.9
Gout	RM.02.51	MS.02.74	716.8	M10
Pseudogout / Chondrocalcinosis	RM.02.52	MS.03.74	716.8	M11.2
Regional Pain Syndrome	RM.03.51	MS.01.83	716.8	R52
McArdle's Syndrome	RM.04.51	MS.04.77	716.8	E74.0
Ankylosing spondylitis	RM.05.51	MS.04.74	720.0	M45
Reiter's Syndrome	RM.05.52	MS.05.74	714.8	M02.3
Seropositive Spondyloarthropathies	RM.05.53		710.8	M03
Other Seronegative Spondarthropathies	RM.05.54	MS.06.74	710.8	M12.8
Rheumatoid Arthritis	RM.05.55	MS.07.74	714.0	M05
Lupus	RM.05.56	MS.08.74	695.4	M32.9
Marfan Syndrome	RM.05.57	MS.01.82	759.8	Q87.4
Ehlers-Danlos Syndrome	RM.05.58	MS.03.82	729.9	Q79.6
Sjogren's Syndrome	RM.05.59	MS.04.82	710.2	M36.8
Fibromyalgia	RM.06.51	MS.00.82	729.0	M79.7
Myositis	RM.07.51	MS.09.74	729.0	M60
Other shoulder injury	SH.00.00	SH.90.00	840.9	S46.8
Shoulder Contusion	SH.00.23	SH.60.24	923.0	S40.0
Shoulder laceration	SH.00.24	SH.60.25	873.0	S41.0
Shoulder abrasion	SH.00.25	SH.60.26	916.0	S41.0
Shoulder neoplasm	SH.00.42	UO.93.76	840.9	D48.0
Deltoid strain	SH.11.07	SH.11.07	840.8	S46.0
Rotator cuff strain	SH.12.07	SH.12.07	840.4	M75.1
Rotator cuff tear	SH.12.09	SH.12.09	726.1	M75.1
Rotator cuff tendinopathy	SH.12.26	SH.12.28	840.6	M75.1
Long head of biceps rupture	SH.13.09	SH.14.09	840.8	M75.2
Long head of biceps tendinitis	SH.13.26	SH.13.28	840.8	M75.2
Pectoralis strain	SH.15.07	SH.13.07	840.8	S46.8
Pectoralis tear / rupture	SH.15.09	SH.13.09	840.8	S46.8
Rhomboid strain	SH.16.07	SH.14.07	840.8	S46.8
Shoulder reflex sympathetic dystrophy	SH.20.41	SH.20.43	955.9	M79.6
Mononeuropathies of upper limb	SH.20.44	SH.20.41	955.9	G56.9
Axillary nerve Injury - Isolated	SH.21.51	SH.21.39	955.0	S44.3
Axillary nerve Injury - With fracture or dislocation	SH.21.52	SH.25.39	955.0	S44.3
Mononeuropathies of upper limb	SH.22.51	SH.22.39	955.7	G56.9
Mononeuropathies of upper limb	SH.23.51	SH.23.39	955.7	G56.9
Mononeuropathies of upper limb	SH.24.51	SH.24.39	955.7	G56.9
Clavicular fracture	SH.32.13	SH.32.13	810.0	S42.0
Scapular fracture	SH.33.13	SH.33.13	811.0	S42.1
Os acromiale -symptomatic	SH.33.51	SH.33.32	811.0	M25.5
Humeral neck fracture	SH.34.13	SH.34.13	812.0	S42.2
Humeral proximal growth plate / physeal injury	SH.34.20	SH.34.20	812.0	S42
Hill-Sachs Lesion	SH.34.51	SH.34.21	812.2	S42.2
Shoulder degenerative/osteoarthritis	SH.40.32	SH.40.34	715.1	M19.9
Shoulder Rheumatoid Arthritis	SH.40.33		716.6	M06.9
Shoulder sepsis	SH.40.38		716.6	M00
Adhesive capsulitis / frozen shoulder	SH.40.51	SH.40.30	726.0	M75.0
Chondromalacia	SH.40.52	SH.40.21	715.1	M94.2
Sternoclavicular joint 1° sprain -acute	SH.41.01	SH.51.01	840.8	S43.6
Sternoclavicular joint 2° sprain -acute	SH.41.02	SH.51.02	840.8	S43.6
Sternoclavicular joint 3° sprain -acute	SH.41.03	SH.51.03	840.8	S43.6
Sternoclavicular joint 1° sprain -chronic	SH.41.04	SH.51.04	840.8	S43.6
Sternoclavicular joint 2° sprain -chronic	SH.41.05	SH.51.05	840.8	S43.6
Sternoclavicular joint 3° sprain -chronic	SH.41.06	SH.51.06	840.8	S43.6
Acromioclavicular 1° sprain -acute	SH.42.01	SH.52.01	840.0	S43.5
Acromioclavicular 2° sprain -acute	SH.42.02	SH.52.02	840.0	S43.5
Acromioclavicular 3° sprain -acute	SH.42.03	SH.52.03	840.0	S43.5
Acromioclavicular 1° sprain -chronic	SH.42.04	SH.52.04	840.0	S43.5
Acromioclavicular 2° sprain -chronic	SH.42.05	SH.52.05	840.0	S43.5
Acromioclavicular 3° sprain -chronic	SH.42.06	SH.52.06	840.0	S43.5
Acromioclavicular 4° to 6° (Type IV-VI) sprain -acute	SH.42.10	SH.52.10	840.0	S43.5
Acromioclavicular 4° to 6° (Type IV-VI) sprain -chronic	SH.42.12	SH.52.12	840.0	S43.5
Acromioclavicular degnerative arthritis	SH.42.32	SH.42.34	840.0	M19.9
Distal clavicular osteolysis	SH.42.53	SH.32.33	840.0	M89.5
Anterior dislocation (initial)	SH.43.10	SH.53.10	831.0	S43.0
Anterior subluxation (initial)	SH.43.11	SH.53.11	831.0	S43
Anterior recurrent dislocation/instability	SH.43.12	SH.53.12	831.0	S43.0
Posterior dislocation (initial)	SH.44.10	SH.54.10	831.0	S43.0
Posterior subluxation	SH.44.11	SH.54.11	831.0	S43
Posterior recurrent dislocation/instability	SH.44.12	SH.54.12	831.0	S43.0
Multi-directional instability (multidirectional)	SH.45.12	SH.56.12	831.0	S43
Multi-directional laxity (multidirectional)	SH.45.51	SH.55.12	831.0	S43
Glenoid labrum tear	SH.46.09	SH.46.21	718.0	S43.3
Bankart lesion	SH.46.51	SH.44.17	718.0	S43.3
SLAP lesion	SH.46.52	SH.47.21	718.0	S46.0
Acute subacromial bursitis - calcific	SH.61.29	SH.41.33	840.9	M75.3
Impingement syndrome/subacromial bursitis	SH.61.52	SH.41.30	726.1	M75.4
Scapulothoracic dysfunction	SH.61.53	SH.90.42	840.9	S46.8
Axillary artery thrombosis	SH.71.51	CV.06.78	903.0	I74.2
Cephalic venous thrombosis	SH.72.51	CV.07.78	900.9	I82
Cephalic venous insufficiency	SH.72.52	CV.01.78	900.9	I87.2
Other thigh injury	TH.00.00	TH.90.00	843.9	M62
Thigh laceration	TH.00.24	TH.60.25	873.0	S71.1
Thigh abrasion	TH.00.25	TH.60.26	916.0	S71.1
Thigh neoplasm	TH.00.42		843.8	D48.0
Quadriceps strain	TH.11.07	TH.11.07	843.8	S76.1
Quadriceps spasm	TH.11.08	TH.11.08	843.8	R25.2
Quadriceps tear/rupture	TH.11.09	TH.11.09	843.8	S76.1
Quadriceps contusion	TH.11.23	TH.11.24	843.8	S70.1
Quadriceps myositis ossificans	TH.11.51	TH.11.33	843.8	M61.0
Hamstring strain	TH.12.07	TH.12.07	843.8	S76.3
Hamstring spasm	TH.12.08	TH.12.08	843.8	R25.2
Hamstring tear/rupture	TH.12.09	TH.12.09	843.8	S76.3
Hamstring contusion	TH.12.23	TH.12.24	843.8	S70.1
Hamstring myositis ossificans	TH.12.51	TH.12.33	843.8	M61.0
Adductor strain	TH.13.07	TH.13.07	843.8	S76.2
Adductor spasm	TH.13.08	TH.13.08	843.8	R25.2
Adductor tear/rupture	TH.13.09	TH.13.09	843.8	S76.2
Adductor contusion	TH.13.23	TH.13.24	843.8	S70.1
Adductor myositis ossificans	TH.13.51	TH.13.33	843.8	M61.0
Sartorius strain	TH.14.07	TH.14.07	843.8	S76.4
Tensor Fascia Lata strain	TH.15.07	HI.16.07	843.8	S76.4
Tensor Fascia Lata spasm	TH.15.08	HI.16.08	843.8	R25.2
Tensor Fascia Lata tear/rupture	TH.15.09	HI.16.09	843.8	S76.4
Tensor Fascia Lata contusion	TH.15.23	HI.16.24	843.8	S70.1
Femoral fracture	TH.32.13	TH.32.13	821.0	S72.3
Femoral avulsion fracture	TH.32.14	TH.32.14	821.0	S72.3
Femoral fracture -non-union	TH.32.15	TH.32.15	821.0	S72.3
Femoral osteochondral fracture	TH.32.17	TH.42.17	821.0	S72.4
Femoral stress fracture	TH.32.18	TH.32.18	821.0	M84.3
Femoral greenstick fracture	TH.32.19	TH.32.19	821.0	S72.3
Femoral growth plate / physeal injury	TH.32.20	TH.32.20	821.0	S72.8
Femoral periostitis	TH.32.30	TH.32.32	730.3	M62
Brodie's abscess of Femur	TH.32.35	MS.03.75	821.0	M85.6
Femoral exostosis	TH.32.37	TH.33.32	821.0	M85.6
Femoral osteomyelitis	TH.32.39	MS.02.75	730.0	M62
Thigh exertional compartment syndrome	TH.80.36	TH.11.36	730.0	M62
Thigh acute compartment syndrome	TH.80.51	TH.10.36	730.0	M62
Other thoracic injury	TR.00.00	CH.90.00	847.1	S29.9
Thoracic contusion	TR.00.23	CH.60.24	922.1	S20.2
Chest laceration	TR.00.24	CH.60.25	873.0	S21.1
Chest abrasion	TR.00.25	CH.60.26	916.0	S21.1
Thoracic neoplasm	TR.00.42	UO.95.76	847.1	D48.0
Pnuemothorax - Traumatic	TR.00.51	CH.80.46	512.0	S27.0
Intercostal muscle strain	TR.11.07	CH.11.07	847.1	S29.0
Serratus anterior strain	TR.12.07	CH.12.07	847.1	S29.0
Latissimus dorsi strain	TR.13.07	CH.13.07	847.1	S29.0
Parathoracic muscle strain	TR.14.07	TS.11.07	847.1	S29.0
Thoracic reflex sympathetic dystrophy	TR.20.41	TS.20.43	956.5	M79.2
Other mononeuropathies	TR.20.44	TS.20.41	956.5	G58
Thoracic spinal cord compression/transection	TR.21.10	TS.22.40	956.5	S24.0
Thoracic spinal contusion/concussion	TR.21.23	TS.21.40	956.5	S24.0
Herpes Zoster / Shingles	TR.21.51	NS.02.75	956.5	B02
Thoracic Spine fracture	TR.31.13	TS.31.13	805.2	S22.0
Scheurmann's disease	TR.31.20	TS.31.20	847.1	M40
Kyphosis	TR.31.52		737.1	M40
Scoliosis	TR.31.53	TS.31.38	737.1	M41
Rib anterior displacement/subluxation	TR.32.11	CH.51.11	847.1	S29.9
Rib fracture	TR.32.13	CH.32.13	847.1	S22.3
Rib stress fracture	TR.32.18	CH.32.18	847.1	M84.3
Rib contusion	TR.32.23	CH.32.24	847.1	S20.2
Sternum / xyphoid fracture	TR.33.13	CH.33.13	847.1	S22.2
Thoracic facet syndrome	TR.41.51	TS.41.30	722.5	M54
Thoracic degenerative disc disease	TR.42.51	TS.52.42	722.5	M19.9
Thoracic disc herniation	TR.42.52	TS.52.33	722.1	M51.9
Costovertebral dysfunction	TR.43.51	TS.43.30	722.1	S29
Rib cartilage Injury / costochondritis	TR.44.31	CH.44.30	847.1	S29.9
Postural Dysfunction	TR.80.51	TS.10.42	737.2	M43.8
Other wrist injury	WR.00.00	WR.90.00	842.0	M62
Wrist contusion	WR.00.23	WR.60.24	923.2	S60.2
Wrist laceration	WR.00.24	WR.60.25	873.0	S61
Wrist abrasion	WR.00.25	WR.60.26	916.0	S61
Wrist neoplasm	WR.00.42		842.0	D48.0
Wrist extensor tendinopathy	WR.11.26	WR.11.28	842.0	S66
Wrist extensor tenosynovitis	WR.11.27	WR.11.29	842.0	M65
Wirst flexor tendinopathy	WR.12.26	WR.12.28	842.0	S66
Wrist flexor tenosynovitis	WR.12.27	WR.12.29	842.0	M65
DeQuervain's Disease	WR.13.51	WR.13.28	842.0	M65
Extensor Carpi Ulnaris Subluxation	WR.14.11	WR.14.28	833.0	S66.3
Wrist reflex sympathetic dystrophy	WR.20.41	WR.20.43	955.9	M79.6
Mononeuropathies of upper limb	WR.20.44	WR.20.41	955.9	G56.9
Carpal tunnel syndrome	WR.21.51	WR.21.39	354.0	G56.0
Ulnar nerve entrapment (Tunnel of Guyon)	WR.22.52	WR.22.39	354.2	S64.0
Scaphoid fracture	WR.32.13	WR.32.13	814.0	S62.0
Scaphoid fracture-non-union	WR.32.15	WR.32.15	814.0	S62.0
Scaphoid avascular necrosis	WR.32.34	WR.32.35	814.0	M87
Lunate fracture	WR.33.13	WR.33.13	814.0	S62.1
Kienboch's disease	WR.33.34	WR.33.35	814.0	M93.1
Triquetrium fracture	WR.34.13	WR.34.13	814.0	S62.1
Pisiform fracture	WR.35.13	WR.35.13	814.0	S62.1
Trapezium fracture	WR.36.13	WR.36.13	814.0	S62.1
Trapezoid fracture	WR.37.13	WR.37.13	814.0	S62.1
Capitate fracture	WR.38.13	WR.38.13	814.0	S62.1
Hamate fracture	WR.39.13	WR.39.13	814.0	S62.1
Hook of hamate fracture	WR.39.14	WR.39.14	814.0	S62.1
Wrist sprain	WR.40.01	WR.50.01	842.0	S63.5
Wrist degenerative/osteoarthritis	WR.40.32	WR.40.34	715.1	M19.9
Wrist sepsis	WR.40.38		842.0	M00
Distal radio-ulnar joint dislocation	WR.41.10	WR.51.10	833.0	S63
Distal radio-ulnar joint instablility	WR.41.12	WR.51.12	833.0	S63
Scapholunate dissociation	WR.42.10	WR.52.10	833.0	S63
Scapholunate instability	WR.43.12	WR.52.12	833.0	S63
Lunate dislocation	WR.44.10	WR.53.10	833.0	S63
Scapholunate DISI/VISI	WR.45.11	WR.54.11	833.0	S63
Pisotriquetral joint injury	WR.46.00	WR.55.01	833.0	S63
Mid-carpal instability	WR.47.12	WR.56.12	833.0	S63
Triangular fibrocartillage complex tear	WR.48.09	WR.48.21	718.8	S63
Wrist capsulitis	WR.49.31	WR.40.30	842.0	S69.8
Wrist impingement	WR.80.51	WR.40.33	842.0	S69.8
Dorsal wrist ganglion	WR.81.51	WR.41.30	842.0	M67.4
Volar wrist ganglion	WR.82.51	WR.42.30	842.0	M67.4
